# Supplementary material
Source: publisher figshare collection journal article supplement (https://gsajournals.figshare.com/ndownloader/files/13248599)
Supplement: Supplementary file 1 [file 13248599]

## Sheet: Table S1
Table S1. Number of generations of mutation accumulation undergone by each line at the time of assay for life-history traits (LH) and of whole genome sequencing (WGS), mean genome-wide coverage for that line, and whether than line was included in Chain et al (2017). Non-MA lines come from a population without discrete generations and thus generation number is unknown. '-' indicates that line not …
Treatment	Line	Generation - LH	Generation - WGS	Coverage - WGS	Chain et al 2017
Metal-free control	C001	-	88	23.5	Included
Metal-free control	C002	135	85	9.1	Included
Metal-free control	C003	129	80	15.2	Included
Metal-free control	C006	128	78	13.7	Included
Metal-free control	C007	-	83	13	Included
Metal-free control	C008	-	80	12	Included
Metal-free control	C012	128	86	13.1	Included
Metal-free control	C013	137	85	14.1	Included
Metal-free control	C014	-	77	14.7	Included
Metal-free control	C016	-	79	14.4	Included
Metal-free control	C017	-	86	14.6	Included
Metal-free control	C018	125	79	11.9	Included
Metal-free control	C020	-	81	10.5	Included
Metal-free control	C021	-	88	12.1	Included
Metal-free control	C023	-	79	10.3	-
Metal-free control	C024	120	73	10.9	Included
Metal-free control	C025	-	87	10.9	Included
Metal-free control	C027	99	76	12.6	-
Metal-free control	C034	-	80	10.5	Included
Metal-free control	C035	-	88	22.2	Included
Metal-free control	C036	-	83	13.5	Included
Metal-free control	C037	132	87	12.3	Included
Metal-free control	C038	134	84	12.5	Included
Metal-free control	C039	-	85	10.3	Included
Metal-free control	C040	-	80	10.9	Included
Metal-free control	C043	-	89	11.8	-
Metal-free control	C044	-	72	11	Included
Metal-free control	C049	-	86	11.1	-
Nickel	C151	-	104	15.5	Included
Nickel	C155	-	143	10.9	Included
Nickel	C167	-	130	11.8	Included
Nickel	C170	-	113	15.9	Included
Nickel	C171	-	139	11.5	Included
Nickel	C178	-	133	15.3	Included
Nickel	C181	-	133	11.6	Included
Nickel	C182	-	128	9.1	Included
Nickel	C187	-	142	9.2	Included
Copper	C251	139	121	11.8	Included
Copper	C254	141	123	12.2	Included
Copper	C256	138	117	13	Included
Copper	C274	134	-	-	-
Copper	C280	-	107	13.5	Included
Copper	C281	138	121	9	Included
Copper	C282	137	-	-	-
Copper	C284	139	121	9.4	Included
Copper	C291	128	112	12.3	Included
Copper	C299	132	114	10.8	Included
Copper	C300	131	113	12.5	Included
Nickel-Copper	C352	127	110	10.4	Included
Nickel-Copper	C355	134	118	10.3	Included
Nickel-Copper	C358	130	-	-	-
Nickel-Copper	C364	-	117	12.1	Included
Nickel-Copper	C372	138	121	12.3	Included
Nickel-Copper	C374	134	115	12.7	Included
Nickel-Copper	C376	134	116	11.1	Included
Nickel-Copper	C378	136	117	10.2	Included
Nickel-Copper	C380	125	110	12	Included
Nickel-Copper	C391	134	116	10.7	Included
Nickel-Copper	C399	130	-	-	-
Non-MA	CC13	Unknown	-	-	-
Non-MA	CC14	Unknown	-	-	-
Non-MA	CC15	Unknown	-	-	-
Non-MA	CC16	Unknown	-	-	-
Non-MA	CC17	Unknown	-	-	-
Non-MA	CC19	Unknown	-	-	-
Non-MA	CC20	Unknown	-	-	-
Non-MA	CC21	Unknown	-	-	-
Non-MA	CC22	Unknown	-	-	-
Non-MA	CC23	Unknown	-	-	-

## Sheet: Table S2
Table S2. Pairwise correlation coefficients among the ten life-history traits assayed; age at release of the first four clutches (C#_AGE), number of offspring for the first four clutches (C#_COUNT), size at release of the first clutch (SIZE) and longevity (LONGEVITY). Correlations performed using per-line mean trait values.Values in bold are significantly different from zero at P = 0.05 after app…
	C1_AGE	C2_AGE	C3_AGE	C4_AGE	C1_COUNT	C2_COUNT	C3_COUNT	C4_COUNT	SIZE
C2_AGE	0.82
C3_AGE	0.71	0.96
C4_AGE	0.56	0.9	0.94
C1_COUNT	-0.18	-0.27	-0.29	-0.36
C2_COUNT	-0.34	-0.43	-0.38	-0.48	0.79
C3_COUNT	-0.27	-0.46	-0.45	-0.54	0.6	0.62
C4_COUNT	-0.15	-0.47	-0.5	-0.61	0.66	0.74	0.77
SIZE	-0.5	-0.53	-0.44	-0.39	0.57	0.64	0.6	0.63
LONGEVITY	0.3	-0.03	-0.12	-0.27	0.5	0.39	0.48	0.66	0.25

## Sheet: Table S3
Table S3. Details of validations performed to asses false-positive rates of our bioinformatic pathway. SNM = single nucleotide mutation, LOH = loss of heterozygosity event.
#	Type	Line	Scaffold	bp	Length (bp)	Ancestral State	Putative Mutant	Primer (f)	Primer (r)	Amplicon (bp)	Actual Mutant	Validated?
1	SNM	C003	1	3535008	-	GG	GA	GAGAGACGCACTAGACACGG	CCTTCCGGATAGATACCCACG	150	GA	Yes
2	SNM	C007	82	525787	-	CC	TC	GGAAGTTGTCTGGATGCCAC	CCGAGGATATTGTGCGACAG	385	TC	Yes
3	SNM	C014	3	3139058	-	CC	GC	GAGTGGACGGCAGAGAGAAC	TCGGGCTATTTTACCCAGAA	408	GC	Yes
4	SNM	C018	1	1913702	-	GG	GA	TGACGACTCATCTCCAACCA	TGGTTGATGTGCTGGTGTTT	250	GA	Yes
5	SNM	C025	40	198251	-	AA	AG	TGTCATTGGGGTATTGCTGA	TACTGGAGACCGGTGGAGAC	247	AG	Yes
6	SNM	C034	28	595217	-	AA	AC	CCGAGTCACGAACAAATCAG	CTGCAAAGCATTCTGGGAGT	152	AC	Yes
7	SNM	C034	35	150941	-	TT	TC	GTGTGGGAACCTGCATTGTA	ATCCCTCCCGATCTGAGACT	244	TC	Yes
8	SNM	C035	80	16734	-	CC	CT	GCTCTTTGAGGAGCGTTGAG	TCAACTTGCGTTTGATCCTG	192	CT	Yes
9	SNM	C039	13	1716997	-	CC	TC	TATTTGCGGGCTGTTGACTG	CTCAGGGAACGATCAGGAGG	236	TC	Yes
10	SNM	C040	12	610351	-	AA	GA	TCAGCGAAGAAGAACTCGGA	TGCTACCCATTTGCCAGGTA	219	GA	Yes
11	SNM	C151	33	538402	-	AA	AT	TTCCTACAGGAACCCATTGC	ATCCAGATCCTGACGCAGTT	249	AT	Yes
12	SNM	C151	153	154957	-	GG	GT	GAAAAGGTTGTGTTTTTGTGGA	ATGGCTCCGGAAAGTACCAC	187	GT	Yes
13	SNM	C167	33	31186	-	GG	AG	CTTATTTCGGGCGTCATCAT	ATCGTCATGGATTTGCTTCC	238	AG	Yes
14	SNM	C170	25	243043	-	AA	AG	CTTTGCATCAGCAGTCCTTTT	gtCCCATAAGCGGAAACGTA	208	AG	Yes
15	SNM	C178	41	507767	-	GG	GA	GTAGACACGGGGGTGACTGT	CTCTGTGGTCCCTTCCTCAA	246	AA	False positive
16	SNM	C197	1	2751893	-	GG	GA	CTAACTGATTGGGCGGTTTG	GGGCGGTTGGAGATACACTA	215	GA	Yes
17	SNM	C251	14	440331	-	GG	GA	TGCAAGATGAGCAATAACAGG	GATGCCCGACTTTGGAGTTA	155	GA	Yes
18	SNM	C254	50	166007	-	AA	AC	CATCAAGTCGCCGTTTTTCT	GCTCTGAAAGGGTACGGTATG	215	AC	Yes
19	SNM	C280	812	5354	-	GG	AG	ATTGGCCACGAACGAAATAG	AGCCCATAGCCAAGAACACA	182	AG	Yes
20	SNM	C299	8	1061067	-	AA	CA	GGGAGGACTGCTGACTAACG	GATTGCGTTATCGGTCCAAC	229	CA	Yes
21	SNM	C300	6	2382610	-	CC	CA	GCAAAGTTAGGAAAGCAGCA	TGATGGGCCATACGACACTA	191	CA	Yes
22	SNM	C355	31	665916	-	AA	AG	GAACAGGAGGGGGAATGAAT	CCCACCATCCCAAAATCTAT	210	AG	Yes
23	SNM	C364	4	1768476	-	AA	AG	TGAAACCTCACGTCCGATGA	TGCTTCAAGGTTGCTGGAAC	177	AG	Yes
24	SNM	C364	152	56530	-	CC	TC	TCTTTACCACCCTTCACGCA	CGGATAGGCGCGAAAACTTA	225	TC	Yes
25	SNM	C372	111	39521	-	CC	AC	ACGTGAATGTCGCTGTTGAG	GTGGCACTACAAGTTCCTGC	216	AC	Yes
26	SNM	C374	215	129518	-	CC	CA	TGTGAATGAACGAGAAGACACA	GGACAGCCGCCTTATCGA	300	CA	Yes
27	SNM	C013	1	1078013	-	TC	TA	CCTCAAACAGACACGGGATT	TTGCTGTTGCTTTTCACCAG	247	TC	False positive
28	SNM	C013	64	463976	-	GC	GT	TTCGGACAGCCTTCAGAGAG	TTTTGCGGGTAGTTCTGTGC	237	GC	False positive
29	SNM	C018	136	9998	-	AC	CG	GATTCAGCGTAATCGGCAGT	TGATGCACCAATTGAAGTACG	202	AC	False positive
30	INDEL	C036	182	129116 - 129118	-1	TC;TC	TC;T	TGTGTAACATTTTGTGGGGAGG	TGTCATGTGAATCAATGGAATGG	296	TC;T	Yes
31	INDEL	C037	5	76129 - 76131	-1	AC;AC	AC;A	ACGTACCTTGTAACCTCCGG	CAGTTCATCCCACCGTTTCC	206	AC;A	Yes
32	INDEL	C280	34	588315 - 588317	-1	TC;TC	TC;T	ACCCGGTCAGATTCATTGTC	TGACGTCGTCGATTACCAAA	153	TC;T	Yes
33	INDEL	C280	44	715970 - 715976	-5	AGGTGC;AGGTGC	AGGTGC;A	TCTTTAGAATAAATCGTGAAACACTG	CGACTGCGATTTTGAATGTC	175	AGGTGC;A	Yes
34	INDEL	C391	78	278765 - 278767	-1	GA;GA	GA;G	ATACAATTGGGGAGAGCGGG	TTGAAGGTGAACATCCCCGT	179	GA;G	Yes
35	LOH	C002	173	171200 - 172728	1528	Multiple Het	All Hom	TCTGATGGGCTGGAAACTGA	CGCCCAGCCGAATGATTTAT	575	All Hom	Yes
36	LOH	C008	11	913054 - 913219	165	Multiple Het	All Hom	GGAAGAGTCGGTTGGTGTCA	TGAATCCAGTTTCTCAAGGTCG	365	Multiple Het	False positive
37	LOH	C023	81	213795 - 214323	528	Multiple Het	All Hom	ATGCCCCATTTGGTCCCC	GACGAACCGGTGATCCATCA	425	All Hom	Yes
38	LOH	C023	87	26642 - 26750	108	Multiple Het	All Hom	TGTCATTCAAAGTTCAAACGAGT	CGGCGATCAAGTTTATGGCA	440	Multiple Het	False positive
39	LOH	C039	10	941423 - 941566	143	Multiple Het	All Hom	TGAGGATGAAATCGTTGGTGG	TGCCGGATATCAAACCAAGG	469	Multiple Het	False positive
40	LOH	C040	327	2326 - 52256	49930	Multiple Het	All Hom	TCAATGCTGAAGTTCGCCG	AAACAAGCAGACAGTCACCG	402	All Hom	Yes
41	LOH	C044	26	667571 - 667697	126	Multiple Het	All Hom	CCTCCCGCCTATAACACACT	CGAGGTACCTGGAAATTGGC	377	Multiple Het	False positive
42	LOH	C049	3	2850295 - 2866760	16465	Multiple Het	All Hom	GACCGACCAACATGCAGATC	CAGAGCTTTCATCGTCACCG	729	All Hom	Yes
43	LOH	C155	10	1855338 - 1855466	128	Multiple Het	All Hom	TCACGCCTCTGATGGATGAA	CGCTTTTACTGGATCGGGTG	555	Multiple Het	False positive
44	LOH	C178	154	213052 - 213163	111	Multiple Het	All Hom	TCTGCTCGTTGATATTTTCGCA	AGAGGAAAGTTGGAGTTGGCT	464	All Hom	Yes
45	LOH	C181	88	270257 - 270381	124	Multiple Het	All Hom	GAATTACAGCGGGTGGTCAA	ACCAATGACCGGACCAGTTC	357	Multiple Het	False positive
46	LOH	C181	128	228746 - 228870	124	Multiple Het	All Hom	GGCCAGCAAAGATTGTGCTA	CTCATTTGTTGCGTGAAGGC	462	Multiple Het	False positive
47	LOH	C187	20	215657 - 585670	370013	Multiple Het	All Hom	AGCAGTTTGGATGTGGAGGA	GTAACTGGCTCCGTTTCACC	509	All Hom	Yes
48	LOH	C187	91	136854 - 137048	194	Multiple Het	All Hom	TCGACTTGATTGGCCAATTGT	GCCAGCGAGTAATACGTGTT	360	Multiple Het	False positive
49	LOH	C281	37	956963 - 957125	162	Multiple Het	All Hom	CCTCGATGATGGTTTGCGAG	ATTACCGTGAAAGAAGCCGC	331	Multiple Het	False positive
50	LOH	C291	133	12141 - 309550	297409	Multiple Het	All Hom	CAGAACCTGGACTATTGCGG	GACACTTGGCCTCTGTTGC	714	All Hom	Yes
51	LOH	C291	1867	806 - 4887	4081	Multiple Het	All Hom	TTTTACCCCTGCTGCAACAC	CCGTGCCAAAGTAAGAGCTC	473	All Hom	Yes
52	LOH	C367	35	218445 - 218653	208	Multiple Het	All Hom	CGTCGTGGTCATTGTGAGTC	ACGTGCAACAAGGTCATTCC	484	All Hom	Yes
53	LOH	C374	10	1388056 - 1398620	10564	Multiple Het	All Hom	CAGAGTGCCTTTGGTCATCC	GCCACCAACTCACTTCGTTA	480	Multiple Het	False positive
54	LOH	C376	85	6899 - 542660	535761	Multiple Het	All Hom	CGTCCGCGTCTTAGAAGTTG	TTCAAGTGGTGGTTTGGTGG	430	All Hom	Yes
55	LOH	C376	406	14247 - 15139	892	Multiple Het	All Hom	TCCATACCTGCAACCCGAG	CATTAAGGCAGGTTCACGCA	479	All Hom	Yes
56	LOH	C376	684	13679 - 16351	2672	Multiple Het	All Hom	TTGCCATCTTACAGCCTGGA	ATGGACAAGATTGATGCCGC	562	All Hom	Yes
57	LOH	C378	11	1543609 - 1543730	121	Multiple Het	All Hom	CTCAGGGAGATGCTACAAGAGA	CCAAGTTTCCACAGTTCCGG	506	Multiple Het	False positive

## Sheet: Table S4
Table S4. Summary of detected mutations in each MA line. SNM = Single Nucleotide Mutation, MNM = Multinucleotide Mutation (spacing between mutated bases given), INDEL = insertion / deletion events, LOH = loss of heterozygosity. Generation is number of generations of mutation accumulation undergone by each line at the time of whole genome sequencing.
			SNMs				LOH Events
Treatment	Line	Generation	Count	Rate (/ bp / gen)	MNMs	INDELs	Count	(/ gen)	bp Affected	(/ gen)	Rate (/ bp / gen)
Metal-free control	C001	88	8	1.16321e-09	0	0	1	0.0113636	1264	14.3636	2.73391e-07
Metal-free control	C002	85	8	1.57233e-09	0	1 (+2)	2	0.0235294	2070	24.3529	8.84954e-07
Metal-free control	C003	80	5	8.18583e-10	0	0	0	0	0	0	0
Metal-free control	C006	78	8	1.35954e-09	0	0	0	0	0	0	0
Metal-free control	C007	83	10	1.61024e-09	0	0	0	0	0	0	0
Metal-free control	C008	80	17	2.92235e-09	2 (X1X3X, X1X)	0	1	0.0125	4113	51.4125	1.14064e-06
Metal-free control	C012	86	5	7.80939e-10	0	0	0	0	0	0	0
Metal-free control	C013	85	14	2.16951e-09	0	0	0	0	0	0	0
Metal-free control	C014	77	10	1.7052e-09	0	0	1	0.012987	292	3.79221	7.59234e-08
Metal-free control	C016	79	5	8.32238e-10	0	0	0	0	0	0	0
Metal-free control	C017	86	5	7.60745e-10	0	1 (-4)	1	0.0116279	5593	65.0349	1.29352e-06
Metal-free control	C018	79	10	1.74781e-09	0	0	0	0	0	0	0
Metal-free control	C020	81	6	1.09111e-09	0	0	2	0.0246914	5269	65.0494	1.68811e-06
Metal-free control	C021	88	10	1.56101e-09	0	1 (-1)	0	0	0	0	0
Metal-free control	C023	79	3	4.99163e-10	0	0	5	0.0632911	1721381	21789.6	0.000439931
Metal-free control	C024	73	9	1.76494e-09	0	0	0	0	0	0	0
Metal-free control	C025	87	16	2.60233e-09	0	0	0	0	0	0	0
Metal-free control	C027	76	7	1.19052e-09	0	0	1	0.0131579	3066	40.3421	7.83494e-07
Metal-free control	C034	80	8	1.48367e-09	0	0	0	0	0	0	0
Metal-free control	C035	88	12	1.74691e-09	0	0	0	0	0	0	0
Metal-free control	C036	83	8	1.28226e-09	0	1 (-1)	0	0	0	0	0
Metal-free control	C037	87	14	2.19208e-09	1 (X1X)	1 (-1)	0	0	0	0	0
Metal-free control	C038	84	11	1.78791e-09	0	0	2	0.0238095	1448	17.2381	3.73654e-07
Metal-free control	C039	85	11	1.93765e-09	0	1 (-7)	1	0.0117647	1026	12.0706	3.27441e-07
Metal-free control	C040	80	9	1.64347e-09	0	0	7	0.0875	7579906	94748.8	0.00241532
Metal-free control	C043	89	9	1.3047e-09	0	0	0	0	0	0	0
Metal-free control	C044	72	9	1.77927e-09	0	0	0	0	0	0	0
Metal-free control	C049	86	13	1.96113e-09	0	1 (-1)	2	0.0232558	17207	200.081	3.91936e-06
Nickel	C151	104	26	3.26368e-09	1 (X2X9X)	0	0	0	0	0	0
Nickel	C155	143	14	1.38813e-09	0	0	1	0.00699301	410	2.86713	6.71896e-08
Nickel	C167	130	17	1.80307e-09	0	0	0	0	0	0	0
Nickel	C170	113	24	2.75725e-09	2 (X10X, X1X)	0	0	0	0	0	0
Nickel	C171	139	4	4.03123e-10	0	0	1	0.00719424	2000	14.3885	3.27133e-07
Nickel	C178	133	25	2.4503e-09	1 (X8X8X)	1 (-2)	1	0.0075188	43058	323.744	6.34818e-06
Nickel	C181	133	6	6.32068e-10	0	0	0	0	0	0	0
Nickel	C182	128	13	1.63141e-09	0	0	2	0.015625	1129	8.82031	2.67911e-07
Nickel	C187	142	17	1.90842e-09	0	0	2	0.0140845	370485	2609.05	7.78243e-05
Copper	C251	121	11	1.26568e-09	0	0	2	0.0165289	2993	24.7355	5.67579e-07
Copper	C254	123	18	1.999e-09	0	0	1	0.00813008	21698	176.407	3.89553e-06
Copper	C256	117	16	1.82883e-09	0	0	0	0	0	0	0
Copper	C280	107	14	1.72854e-09	1 (X1X)	2 (-1,-5)	5	0.046729	413578	3865.21	7.84373e-05
Copper	C281	121	16	2.13402e-09	0	0	1	0.00826446	418	3.45455	1.12241e-07
Copper	C284	121	14	1.77484e-09	0	0	0	0	0	0	0
Copper	C291	112	19	2.29931e-09	1 (X6X29X)	0	6	0.0535714	777664	6943.43	0.000149765
Copper	C299	114	11	1.36525e-09	0	1 (-2)	1	0.00877193	368	3.22807	7.67247e-08
Copper	C300	113	14	1.68063e-09	0	1 (-3)	1	0.00884956	6073	53.7434	1.16533e-06
Nickel-Copper	C352	110	15	1.99572e-09	1 (X18X)	0	2	0.0181818	1051144	9555.85	0.000244813
Nickel-Copper	C355	118	10	1.24733e-09	0	1 (-4)	1	0.00847458	1102	9.33898	2.40793e-07
Nickel-Copper	C364	117	9	1.06285e-09	0	0	1	0.00854701	349	2.98291	6.67432e-08
Nickel-Copper	C372	121	11	1.25727e-09	0	0	1	0.00826446	844	6.97521	1.55196e-07
Nickel-Copper	C374	115	12	1.40848e-09	0	1 (-1)	3	0.026087	24767	215.365	4.59142e-06
Nickel-Copper	C376	116	10	1.21898e-09	0	1 (-1)	8	0.0689655	7611303	65614.7	0.00154755
Nickel-Copper	C378	117	14	1.78001e-09	0	0	0	0	0	0	0
Nickel-Copper	C380	110	14	1.74751e-09	0	0	0	0	0	0	0
Nickel-Copper	C391	116	10	1.22379e-09	0	1 (-1)	1	0.00862069	9441	81.3879	1.94446e-06

## Sheet: Table S5
Table S5. Details of the 644 SNMs detected. Type indicates if the affected site was homozygous (Hom) or heterozygous (Het) before and after the INDEL. Genome region, gene effected (DAPPUDRAFT_### in reference genome if not named, or closest gene if mutation occurred in an intergenic region) and effects were determined using snpEFF v4.30. Cingolani P et al. (2012) A program for annotating and pred…
#	Line	Treatment	Type	Scaffold	Position	Ancestral state	Mutant state	Genome region	Gene	Effect														Genome region	Gene	Effect
1	C001	Metal-free control	Hom-Het	4	221748	GG	GC	Exonic	230293	missense_variant													missense_variant|MODERATE|DAPPUDRAFT_230293|DAPPUDRAFT_230293|transcript|EFX87864.1|protein_coding|2/8|c.37G>C|p.Ala13Pro|140/1637|37/882|13/293||,C|upstream_gene_variant|MODIFIER|DAPPUDRAFT_42230|DAPPUDRAFT_42230|transcript|EFX88457.1|protein_coding||c.-2780C>G|||||2780|,C|upstream_gene_variant|MODIFIER|DAPPUDRAFT_191515|DAPPUDRAFT_191515|transcript|EFX88456.1|protein_coding||c.-335C>G|||||335|
2	C001	Metal-free control	Hom-Het	8	1354537	CC	CT	Exonic	98029	missense_variant													missense_variant|MODERATE|DAPPUDRAFT_98029|DAPPUDRAFT_98029|transcript|EFX86181.1|protein_coding|14/14|c.2552C>T|p.Thr851Ile|2552/2589|2552/2589|851/862||,T|upstream_gene_variant|MODIFIER|DAPPUDRAFT_308482|DAPPUDRAFT_308482|transcript|EFX86182.1|protein_coding||c.-1662C>T|||||1446|,T|downstream_gene_variant|MODIFIER|DAPPUDRAFT_308480|DAPPUDRAFT_308480|transcript|EFX86369.1|protein_coding||c.*296G…
3	C001	Metal-free control	Hom-Het	12	906483	CC	TC	Exonic	209520	synonymous_variant													synonymous_variant|LOW|DAPPUDRAFT_209520|DAPPUDRAFT_209520|transcript|EFX84686.1|protein_coding|30/40|c.7074G>A|p.Leu2358Leu|7074/11541|7074/11541|2358/3846||WARNING_TRANSCRIPT_NO_STOP_CODON
4	C001	Metal-free control	Hom-Het	37	213999	GG	GA	Intergenic	320790	upstream_gene_variant													upstream_gene_variant|MODIFIER|DAPPUDRAFT_320790|DAPPUDRAFT_320790|transcript|EFX77941.1|protein_coding||c.-890G>A|||||890|,A|intergenic_region|MODIFIER|DAPPUDRAFT_53701-DAPPUDRAFT_320790|DAPPUDRAFT_53701-DAPPUDRAFT_320790|intergenic_region|DAPPUDRAFT_53701-DAPPUDRAFT_320790|||n.214000G>A||||||
5	C001	Metal-free control	Hom-Het	76	67710	TT	AT	Exonic	326077	missense_variant													missense_variant|MODERATE|DAPPUDRAFT_326077|DAPPUDRAFT_326077|transcript|EFX72540.1|protein_coding|4/7|c.390T>A|p.His130Gln|390/834|390/834|130/277||,A|upstream_gene_variant|MODIFIER|DAPPUDRAFT_308197|DAPPUDRAFT_308197|transcript|EFX72607.1|protein_coding||c.-998A>T|||||917|,A|upstream_gene_variant|MODIFIER|DAPPUDRAFT_231414|DAPPUDRAFT_231414|transcript|EFX72541.1|protein_coding||c.-3478T>A|||||3…
6	C001	Metal-free control	Hom-Het	76	324756	GG	GA	Intronic	326110	intron_variant													intron_variant|MODIFIER|DAPPUDRAFT_326110|DAPPUDRAFT_326110|transcript|EFX72556.1|protein_coding|3/13|c.524+8858G>A||||||
7	C001	Metal-free control	Hom-Het	107	189128	GG	AG	Intronic	300674	3_prime_UTR_variant													3_prime_UTR_variant|MODIFIER|DAPPUDRAFT_300674|DAPPUDRAFT_300674|transcript|EFX69846.1|protein_coding|5/5|c.*205G>A|||||205|,A|downstream_gene_variant|MODIFIER|DAPPUDRAFT_300664|DAPPUDRAFT_300664|transcript|EFX69879.1|protein_coding||c.*212C>T|||||160|,A|downstream_gene_variant|MODIFIER|DAPPUDRAFT_300675|DAPPUDRAFT_300675|transcript|EFX69878.1|protein_coding||c.*2445C>T|||||2186|
8	C001	Metal-free control	Hom-Het	141	55825	AA	AG	Intergenic	RAD21	upstream_gene_variant													upstream_gene_variant|MODIFIER|RAD21|DAPPUDRAFT_114887|transcript|EFX68066.2|protein_coding||c.-120T>C|||||120|,G|upstream_gene_variant|MODIFIER|DAPPUDRAFT_229022|DAPPUDRAFT_229022|transcript|EFX68040.1|protein_coding||c.-849A>G|||||849|,G|intergenic_region|MODIFIER|RAD21-DAPPUDRAFT_229022|DAPPUDRAFT_114887-DAPPUDRAFT_229022|intergenic_region|DAPPUDRAFT_114887-DAPPUDRAFT_229022|||n.55826A>G||||||
9	C002	Metal-free control	Hom-Het	1	2476249	CC	CA	Intergenic	299906	upstream_gene_variant													upstream_gene_variant|MODIFIER|DAPPUDRAFT_299906|DAPPUDRAFT_299906|transcript|EFX90062.1|protein_coding||c.-1061C>A|||||963|,A|downstream_gene_variant|MODIFIER|DAPPUDRAFT_309842|DAPPUDRAFT_309842|transcript|EFX90285.1|protein_coding||c.*1438G>T|||||1417|,A|intron_variant|MODIFIER|DAPPUDRAFT_309841|DAPPUDRAFT_309841|transcript|EFX90286.1|protein_coding|2/14|c.388+31G>T||||||
10	C002	Metal-free control	Hom-Het	3	1326982	GG	GT	Intergenic	304684	downstream_gene_variant													downstream_gene_variant|MODIFIER|DAPPUDRAFT_304684|DAPPUDRAFT_304684|transcript|EFX89061.1|protein_coding||c.*5701C>A|||||4917|,T|intergenic_region|MODIFIER|FAS-DAPPUDRAFT_304684|DAPPUDRAFT_346926-DAPPUDRAFT_304684|intergenic_region|DAPPUDRAFT_346926-DAPPUDRAFT_304684|||n.1326983G>T||||||
11	C002	Metal-free control	Hom-Het	9	1263920	CC	CG	Exonic	98439	missense_variant													missense_variant|MODERATE|DAPPUDRAFT_98439|DAPPUDRAFT_98439|transcript|EFX85947.1|protein_coding|1/1|c.143G>C|p.Arg48Pro|143/1590|143/1590|48/529||,G|upstream_gene_variant|MODIFIER|DAPPUDRAFT_309001|DAPPUDRAFT_309001|transcript|EFX85948.1|protein_coding||c.-3810G>C|||||3678|,G|upstream_gene_variant|MODIFIER|MTN3|DAPPUDRAFT_290508|transcript|EFX85803.2|protein_coding||c.-4092C>G|||||4027|WARNING_T…
12	C002	Metal-free control	Hom-Het	12	761918	CC	CA	Exonic	238698	synonymous_variant													synonymous_variant|LOW|DAPPUDRAFT_238698|DAPPUDRAFT_238698|transcript|EFX84410.1|protein_coding|3/6|c.369C>A|p.Ser123Ser|369/933|369/933|123/310||,A|upstream_gene_variant|MODIFIER|DAPPUDRAFT_314698|DAPPUDRAFT_314698|transcript|EFX84702.1|protein_coding||c.-4127G>T|||||3918|,A|downstream_gene_variant|MODIFIER|DAPPUDRAFT_222925|DAPPUDRAFT_222925|transcript|EFX84408.2|protein_coding||c.*5081C>A|||||…
13	C002	Metal-free control	Hom-Het	20	916467	AA	AG	Exonic	224138	missense_variant													missense_variant|MODERATE|DAPPUDRAFT_224138|DAPPUDRAFT_224138|transcript|EFX81773.1|protein_coding|4/5|c.409T>C|p.Phe137Leu|532/1208|409/1011|137/336||,G|upstream_gene_variant|MODIFIER|DAPPUDRAFT_211157|DAPPUDRAFT_211157|transcript|EFX81774.1|protein_coding||c.-967T>C|||||917|,G|downstream_gene_variant|MODIFIER|DAPPUDRAFT_224137|DAPPUDRAFT_224137|transcript|EFX81666.1|protein_coding||c.*2231A>G||…
14	C002	Metal-free control	Hom-Het	20	1312750	TT	TC	Intergenic	303363	upstream_gene_variant													upstream_gene_variant|MODIFIER|DAPPUDRAFT_303363|DAPPUDRAFT_303363|transcript|EFX81740.1|protein_coding||c.-4638A>G|||||4602|,C|downstream_gene_variant|MODIFIER|DAPPUDRAFT_317406|DAPPUDRAFT_317406|transcript|EFX81709.1|protein_coding||c.*3180T>C|||||3180|,C|downstream_gene_variant|MODIFIER|DAPPUDRAFT_317409|DAPPUDRAFT_317409|transcript|EFX81739.1|protein_coding||c.*2529A>G|||||2349|,C|downstream_…
15	C002	Metal-free control	Hom-Het	134	270405	AA	AG	Intergenic	260203	upstream_gene_variant													upstream_gene_variant|MODIFIER|DAPPUDRAFT_260203|DAPPUDRAFT_260203|transcript|EFX68400.1|protein_coding||c.-2621T>C|||||2621|,G|intergenic_region|MODIFIER|DAPPUDRAFT_260203-DAPPUDRAFT_330160|DAPPUDRAFT_260203-DAPPUDRAFT_330160|intergenic_region|DAPPUDRAFT_260203-DAPPUDRAFT_330160|||n.270406A>G||||||
16	C002	Metal-free control	Hom-Het	221	478	AA	AG	Intergenic	117215	downstream_gene_variant													downstream_gene_variant|MODIFIER|DAPPUDRAFT_117215|DAPPUDRAFT_117215|transcript|EFX65507.1|protein_coding||c.*2901T>C|||||2901|,G|intergenic_region|MODIFIER|CHR_START-DAPPUDRAFT_117215|CHR_START-DAPPUDRAFT_117215|intergenic_region|CHR_START-DAPPUDRAFT_117215|||n.479A>G||||||
17	C003	Metal-free control	Hom-Het	1	3535008	GG	GA	Intergenic	94461 / 39527	intergenic_region													intergenic_region|MODIFIER|DAPPUDRAFT_94461-DAPPUDRAFT_39527|DAPPUDRAFT_94461-DAPPUDRAFT_39527|intergenic_region|DAPPUDRAFT_94461-DAPPUDRAFT_39527|||n.3535009G>A||||||
18	C003	Metal-free control	Hom-Het	2	711601	GG	GA	Intronic	303127	3_prime_UTR_variant													3_prime_UTR_variant|MODIFIER|DAPPUDRAFT_303127|DAPPUDRAFT_303127|transcript|EFX89764.1|protein_coding|24/24|c.*118C>T|||||118|,A|upstream_gene_variant|MODIFIER|DPUGR49|DAPPUDRAFT_346895|transcript|EFX89765.1|protein_coding||c.-4784C>T|||||4784|
19	C003	Metal-free control	Hom-Het	14	1507208	GG	GA	Intergenic	301662	upstream_gene_variant													upstream_gene_variant|MODIFIER|DAPPUDRAFT_301662|DAPPUDRAFT_301662|transcript|EFX83753.1|protein_coding||c.-1203C>T|||||1074|,A|intron_variant|MODIFIER|DAPPUDRAFT_315602|DAPPUDRAFT_315602|transcript|EFX83695.1|protein_coding|1/12|c.182-102G>A||||||
20	C003	Metal-free control	Hom-Het	33	289464	AA	CA	Intergenic	tRNA-Pseudo	upstream_gene_variant													upstream_gene_variant|MODIFIER|tRNA-Pseudo|EMDPUG00000004000|transcript|EMDPUT00000004000.1|pseudogene||n.-4485A>C|||||4485|,C|intergenic_region|MODIFIER|DAPPUDRAFT_320027-tRNA-Pseudo|DAPPUDRAFT_320027-EMDPUG00000004000|intergenic_region|DAPPUDRAFT_320027-EMDPUG00000004000|||n.289465A>C||||||
21	C003	Metal-free control	Hom-Het	275	36801	CC	CT	Intergenic	304267	upstream_gene_variant													upstream_gene_variant|MODIFIER|DAPPUDRAFT_304267|DAPPUDRAFT_304267|transcript|EFX64731.1|protein_coding||c.-4436G>A|||||4436|,T|intergenic_region|MODIFIER|DAPPUDRAFT_304267-DPSIX|DAPPUDRAFT_304267-DAPPUDRAFT_14338|intergenic_region|DAPPUDRAFT_304267-DAPPUDRAFT_14338|||n.36802C>T||||||
22	C006	Metal-free control	Hom-Het	1	45676	TT	TC	Intronic	231944	intron_variant													intron_variant|MODIFIER|DAPPUDRAFT_231944|DAPPUDRAFT_231944|transcript|EFX90461.1|protein_coding|2/6|c.75+756A>G||||||
23	C006	Metal-free control	Hom-Het	1	2755028	CC	CT	Intergenic	205349	downstream_gene_variant													downstream_gene_variant|MODIFIER|DAPPUDRAFT_205349|DAPPUDRAFT_205349|transcript|EFX90087.1|protein_coding||c.*442C>T|||||404|,T|downstream_gene_variant|MODIFIER|DAPPUDRAFT_39669|DAPPUDRAFT_39669|transcript|EFX90263.1|protein_coding||c.*1831G>A|||||1831|,T|intergenic_region|MODIFIER|DAPPUDRAFT_205349-DAPPUDRAFT_39669|DAPPUDRAFT_205349-DAPPUDRAFT_39669|intergenic_region|DAPPUDRAFT_205349-DAPPUDRAFT…
24	C006	Metal-free control	Hom-Het	30	141929	TT	TC	Intergenic	244873 / 104269	intergenic_region													intergenic_region|MODIFIER|DAPPUDRAFT_244873-DAPPUDRAFT_104369|DAPPUDRAFT_244873-DAPPUDRAFT_104369|intergenic_region|DAPPUDRAFT_244873-DAPPUDRAFT_104369|||n.141930T>C||||||
25	C006	Metal-free control	Hom-Het	35	619037	TT	TC	Intergenic	246214	upstream_gene_variant													upstream_gene_variant|MODIFIER|DAPPUDRAFT_246214|DAPPUDRAFT_246214|transcript|EFX78517.1|protein_coding||c.-3775A>G|||||3775|,C|upstream_gene_variant|MODIFIER|DAPPUDRAFT_320454|DAPPUDRAFT_320454|transcript|EFX78516.1|protein_coding||c.-1463A>G|||||1463|WARNING_TRANSCRIPT_INCOMPLETE,C|downstream_gene_variant|MODIFIER|DAPPUDRAFT_128674|DAPPUDRAFT_128674|transcript|EFX78453.1|protein_coding||c.*2755…
26	C006	Metal-free control	Hom-Het	44	394411	CC	CT	Intergenic	248477	upstream_gene_variant													upstream_gene_variant|MODIFIER|DAPPUDRAFT_248477|DAPPUDRAFT_248477|transcript|EFX76900.1|protein_coding||c.-4726G>A|||||4726|,T|downstream_gene_variant|MODIFIER|DAPPUDRAFT_321964|DAPPUDRAFT_321964|transcript|EFX76899.1|protein_coding||c.*3775G>A|||||3775|,T|intergenic_region|MODIFIER|DAPPUDRAFT_248477-DAPPUDRAFT_321964|DAPPUDRAFT_248477-DAPPUDRAFT_321964|intergenic_region|DAPPUDRAFT_248477-DAPPUD…
27	C006	Metal-free control	Hom-Het	93	279751	AA	TA	Intergenic	112220	downstream_gene_variant													downstream_gene_variant|MODIFIER|DAPPUDRAFT_112220|DAPPUDRAFT_112220|transcript|EFX70942.1|protein_coding||c.*1020A>T|||||1020|,T|downstream_gene_variant|MODIFIER|DAPPUDRAFT_327649|DAPPUDRAFT_327649|transcript|EFX70976.1|protein_coding||c.*692T>A|||||692|,T|downstream_gene_variant|MODIFIER|DAPPUDRAFT_31637|DAPPUDRAFT_31637|transcript|EFX70975.1|protein_coding||c.*2554T>A|||||2554|WARNING_TRANSCRI…
28	C006	Metal-free control	Hom-Het	158	27473	CC	TC	Exonic	115522	synonymous_variant													synonymous_variant|LOW|DAPPUDRAFT_115522|DAPPUDRAFT_115522|transcript|EFX67319.1|protein_coding|2/5|c.774C>T|p.Leu258Leu|774/1620|774/1620|258/539||,T|upstream_gene_variant|MODIFIER|DAPPUDRAFT_115521|DAPPUDRAFT_115521|transcript|EFX67341.1|protein_coding||c.-2010G>A|||||2010|
29	C006	Metal-free control	Hom-Het	244	89439	GG	GA	Intergenic	117585	downstream_gene_variant													downstream_gene_variant|MODIFIER|DAPPUDRAFT_117585|DAPPUDRAFT_117585|transcript|EFX65066.1|protein_coding||c.*888C>T|||||888|,A|intron_variant|MODIFIER|DAPPUDRAFT_333566|DAPPUDRAFT_333566|transcript|EFX65063.1|protein_coding|1/1|c.119-277G>A||||||
30	C007	Metal-free control	Hom-Het	3	3449333	AA	AC	Intergenic	41774	upstream_gene_variant													upstream_gene_variant|MODIFIER|DAPPUDRAFT_41774|DAPPUDRAFT_41774|transcript|EFX88791.1|protein_coding||c.-1176A>C|||||1176|,C|downstream_gene_variant|MODIFIER|DAPPUDRAFT_206552|DAPPUDRAFT_206552|transcript|EFX88855.1|protein_coding||c.*2048T>G|||||1912|,C|intron_variant|MODIFIER|DAPPUDRAFT_304786|DAPPUDRAFT_304786|transcript|EFX88856.1|protein_coding|1/13|c.94-53T>G||||||
31	C007	Metal-free control	Hom-Het	12	760768	AA	AG	Exonic	314699	missense_variant													missense_variant|MODERATE|DAPPUDRAFT_314699|DAPPUDRAFT_314699|transcript|EFX84409.1|protein_coding|6/6|c.953A>G|p.Gln318Arg|1106/1474|953/1152|318/383||,G|upstream_gene_variant|MODIFIER|DAPPUDRAFT_314698|DAPPUDRAFT_314698|transcript|EFX84702.1|protein_coding||c.-2977T>C|||||2768|,G|upstream_gene_variant|MODIFIER|DAPPUDRAFT_238698|DAPPUDRAFT_238698|transcript|EFX84410.1|protein_coding||c.-636A>G||…
32	C007	Metal-free control	Hom-Het	20	1077828	AA	AC	Intergenic	102226	downstream_gene_variant													downstream_gene_variant|MODIFIER|DAPPUDRAFT_102226|DAPPUDRAFT_102226|transcript|EFX81759.1|protein_coding||c.*3873T>G|||||3873|,C|intron_variant|MODIFIER|DAPPUDRAFT_49977|DAPPUDRAFT_49977|transcript|EFX81760.1|protein_coding|1/24|c.177-146T>G||||||
33	C007	Metal-free control	Hom-Het	23	72724	CC	CT	Intergenic	317968	upstream_gene_variant													upstream_gene_variant|MODIFIER|DAPPUDRAFT_317968|DAPPUDRAFT_317968|transcript|EFX80847.1|protein_coding||c.-773C>T|||||773|,T|downstream_gene_variant|MODIFIER|DAPPUDRAFT_242836|DAPPUDRAFT_242836|transcript|EFX80845.1|protein_coding||c.*2621C>T|||||2621|,T|downstream_gene_variant|MODIFIER|DAPPUDRAFT_317967|DAPPUDRAFT_317967|transcript|EFX80846.1|protein_coding||c.*1151C>T|||||1151|,T|downstream_ge…
34	C007	Metal-free control	Hom-Het	24	1135134	AA	AT	Intergenic	103202	upstream_gene_variant													upstream_gene_variant|MODIFIER|DAPPUDRAFT_103202|DAPPUDRAFT_103202|transcript|EFX80719.1|protein_coding||c.-1458T>A|||||1458|,T|upstream_gene_variant|MODIFIER|DAPPUDRAFT_303877|DAPPUDRAFT_303877|transcript|EFX80685.1|protein_coding||c.-4115A>T|||||4091|,T|downstream_gene_variant|MODIFIER|DAPPUDRAFT_224590|DAPPUDRAFT_224590|transcript|EFX80718.1|protein_coding||c.*1023T>A|||||516|,T|downstream_gen…
35	C007	Metal-free control	Hom-Het	26	698585	AA	AT	Exonic	304178	missense_variant													missense_variant|MODERATE|DAPPUDRAFT_304178|DAPPUDRAFT_304178|transcript|EFX80262.1|protein_coding|2/2|c.178T>A|p.Cys60Ser|272/839|178/690|60/229||,T|upstream_gene_variant|MODIFIER|DAPPUDRAFT_304200|DAPPUDRAFT_304200|transcript|EFX80263.1|protein_coding||c.-839T>A|||||733|,T|upstream_gene_variant|MODIFIER|DAPPUDRAFT_304179|DAPPUDRAFT_304179|transcript|EFX80166.1|protein_coding||c.-3912A>T|||||377…
36	C007	Metal-free control	Hom-Het	29	782883	GG	GC	Intergenic	225030	downstream_gene_variant													downstream_gene_variant|MODIFIER|DAPPUDRAFT_225030|DAPPUDRAFT_225030|transcript|EFX79650.1|protein_coding||c.*2916C>G|||||2619|,C|intergenic_region|MODIFIER|DAPPUDRAFT_304489-DAPPUDRAFT_225030|DAPPUDRAFT_304489-DAPPUDRAFT_225030|intergenic_region|DAPPUDRAFT_304489-DAPPUDRAFT_225030|||n.782884G>C||||||
37	C007	Metal-free control	Hom-Het	82	525787	CC	TC	Exonic	308628	missense_variant													missense_variant|MODERATE|DAPPUDRAFT_308628|DAPPUDRAFT_308628|transcript|EFX71969.1|protein_coding|7/9|c.1105G>A|p.Glu369Lys|1189/1788|1105/1491|369/496||,T|upstream_gene_variant|MODIFIER|DAPPUDRAFT_308613|DAPPUDRAFT_308613|transcript|EFX71970.1|protein_coding||c.-2666G>A|||||2436|,T|upstream_gene_variant|MODIFIER|DAPPUDRAFT_231471|DAPPUDRAFT_231471|transcript|EFX71961.1|protein_coding||c.-1767C>…
38	C007	Metal-free control	Hom-Het	184	141751	GG	TG	Intergenic	11288	downstream_gene_variant													downstream_gene_variant|MODIFIER|DAPPUDRAFT_11288|DAPPUDRAFT_11288|transcript|EFX66374.1|protein_coding||c.*2961G>T|||||2961|WARNING_TRANSCRIPT_NO_START_CODON,T|intergenic_region|MODIFIER|DAPPUDRAFT_11288-DAPPUDRAFT_263269|DAPPUDRAFT_11288-DAPPUDRAFT_263269|intergenic_region|DAPPUDRAFT_11288-DAPPUDRAFT_263269|||n.141752G>T||||||
39	C007	Metal-free control	Hom-Het	405	33024	TT	TC	Intergenic	267358	downstream_gene_variant													downstream_gene_variant|MODIFIER|DAPPUDRAFT_267358|DAPPUDRAFT_267358|transcript|EFX63951.1|protein_coding||c.*2355A>G|||||2355|,C|intergenic_region|MODIFIER|DAPPUDRAFT_267356-DAPPUDRAFT_267358|DAPPUDRAFT_267356-DAPPUDRAFT_267358|intergenic_region|DAPPUDRAFT_267356-DAPPUDRAFT_267358|||n.33025T>C||||||
40	C008	Metal-free control	Hom-Het	2	1511202	AA	TA	Intergenic	220453	upstream_gene_variant													upstream_gene_variant|MODIFIER|DAPPUDRAFT_220453|DAPPUDRAFT_220453|transcript|EFX89323.1|protein_coding||c.-3757A>T|||||3757|,T|downstream_gene_variant|MODIFIER|DAPPUDRAFT_40660|DAPPUDRAFT_40660|transcript|EFX89321.1|protein_coding||c.*1941A>T|||||1941|WARNING_TRANSCRIPT_NO_START_CODON,T|downstream_gene_variant|MODIFIER|DAPPUDRAFT_303161|DAPPUDRAFT_303161|transcript|EFX89322.1|protein_coding||c.*…
41	C008	Metal-free control	Hom-Het	3	1610643	CC	CT	Exonic	191143	stop_gained													stop_gained|HIGH|DAPPUDRAFT_191143|DAPPUDRAFT_191143|transcript|EFX88624.1|protein_coding|6/17|c.637C>T|p.Gln213*|730/2895|637/2802|213/933||,T|downstream_gene_variant|MODIFIER|DAPPUDRAFT_304702|DAPPUDRAFT_304702|transcript|EFX88623.1|protein_coding||c.*2662C>T|||||2364|,T|downstream_gene_variant|MODIFIER|DAPPUDRAFT_233844|DAPPUDRAFT_233844|transcript|EFX89029.1|protein_coding||c.*3070G>A|||||307…
42	C008	Metal-free control	Hom-Het	4	90959	TT	TA	Intergenic	311239 / 221078	intergenic_region													intergenic_region|MODIFIER|DAPPUDRAFT_311239-DAPPUDRAFT_221078|DAPPUDRAFT_311239-DAPPUDRAFT_221078|intergenic_region|DAPPUDRAFT_311239-DAPPUDRAFT_221078|||n.90960T>A||||||
43	C008	Metal-free control	Hom-Het	4	90961	TT	TC	Intergenic	311239 / 221078	intergenic_region													intergenic_region|MODIFIER|DAPPUDRAFT_311239-DAPPUDRAFT_221078|DAPPUDRAFT_311239-DAPPUDRAFT_221078|intergenic_region|DAPPUDRAFT_311239-DAPPUDRAFT_221078|||n.90962T>C||||||
44	C008	Metal-free control	Hom-Het	4	90965	CC	CT	Intergenic	311239 / 221078	intergenic_region													intergenic_region|MODIFIER|DAPPUDRAFT_311239-DAPPUDRAFT_221078|DAPPUDRAFT_311239-DAPPUDRAFT_221078|intergenic_region|DAPPUDRAFT_311239-DAPPUDRAFT_221078|||n.90966C>T||||||
45	C008	Metal-free control	Hom-Het	4	922962	TT	TC	Exonic	96038	missense_variant													missense_variant|MODERATE|DAPPUDRAFT_96038|DAPPUDRAFT_96038|transcript|EFX88393.1|protein_coding|4/6|c.995A>G|p.Asn332Ser|995/1411|995/1411|332/469||WARNING_TRANSCRIPT_INCOMPLETE,C|downstream_gene_variant|MODIFIER|DAPPUDRAFT_230298|DAPPUDRAFT_230298|transcript|EFX87939.1|protein_coding||c.*4506T>C|||||4451|,C|downstream_gene_variant|MODIFIER|DAPPUDRAFT_305459|DAPPUDRAFT_305459|transcript|EFX87940…
46	C008	Metal-free control	Hom-Het	11	811912	AA	GA	Exonic	314379	missense_variant													missense_variant|MODERATE|DAPPUDRAFT_314379|DAPPUDRAFT_314379|transcript|EFX85094.1|protein_coding|2/29|c.305T>C|p.Leu102Ser|481/6553|305/6204|102/2067||,G|upstream_gene_variant|MODIFIER|DAPPUDRAFT_194112|DAPPUDRAFT_194112|transcript|EFX84840.1|protein_coding||c.-1095A>G|||||863|,G|downstream_gene_variant|MODIFIER|DAPPUDRAFT_314381|DAPPUDRAFT_314381|transcript|EFX85093.1|protein_coding||c.*2956T>…
47	C008	Metal-free control	Hom-Het	16	1305646	CC	CT	Intergenic	100990	upstream_gene_variant													upstream_gene_variant|MODIFIER|DAPPUDRAFT_100990|DAPPUDRAFT_100990|transcript|EFX83086.1|protein_coding||c.-3898G>A|||||3898|,T|upstream_gene_variant|MODIFIER|DAPPUDRAFT_316155|DAPPUDRAFT_316155|transcript|EFX83085.1|protein_coding||c.-1775G>A|||||1775|,T|downstream_gene_variant|MODIFIER|DAPPUDRAFT_240584|DAPPUDRAFT_240584|transcript|EFX83084.1|protein_coding||c.*3896G>A|||||3896|,T|downstream_ge…
48	C008	Metal-free control	Hom-Het	26	529769	CC	TC	Intergenic	243869	upstream_gene_variant													upstream_gene_variant|MODIFIER|DAPPUDRAFT_243869|DAPPUDRAFT_243869|transcript|EFX80278.1|protein_coding||c.-3966G>A|||||3966|,T|upstream_gene_variant|MODIFIER|DAPPUDRAFT_28476|DAPPUDRAFT_28476|transcript|EFX80277.1|protein_coding||c.-135G>A|||||135|WARNING_TRANSCRIPT_NO_START_CODON,T|downstream_gene_variant|MODIFIER|DAPPUDRAFT_51546|DAPPUDRAFT_51546|transcript|EFX80276.1|protein_coding||c.*28G>A|…
49	C008	Metal-free control	Hom-Het	74	181366	CC	CT	Intergenic	308080 / 254015	intergenic_region													intergenic_region|MODIFIER|DAPPUDRAFT_308080-DAPPUDRAFT_254015|DAPPUDRAFT_308080-DAPPUDRAFT_254015|intergenic_region|DAPPUDRAFT_308080-DAPPUDRAFT_254015|||n.181367C>T||||||
50	C008	Metal-free control	Hom-Het	74	391301	AA	AG	Intergenic	215796	downstream_gene_variant													downstream_gene_variant|MODIFIER|DAPPUDRAFT_215796|DAPPUDRAFT_215796|transcript|EFX72756.1|protein_coding||c.*3770A>G|||||3750|,G|intron_variant|MODIFIER|DAPPUDRAFT_347281|DAPPUDRAFT_347281|transcript|EFX72783.1|protein_coding|21/30|c.3118+39T>C||||||
51	C008	Metal-free control	Hom-Het	77	374066	GG	AG	Intergenic	59074	downstream_gene_variant													downstream_gene_variant|MODIFIER|DAPPUDRAFT_59074|DAPPUDRAFT_59074|transcript|EFX72463.1|protein_coding||c.*1958G>A|||||1958|,A|downstream_gene_variant|MODIFIER|DAPPUDRAFT_59091|DAPPUDRAFT_59091|transcript|EFX72506.1|protein_coding||c.*1332C>T|||||1332|,A|downstream_gene_variant|MODIFIER|DAPPUDRAFT_326201|DAPPUDRAFT_326201|transcript|EFX72505.1|protein_coding||c.*3952C>T|||||3952|,A|downstream_ge…
52	C008	Metal-free control	Hom-Het	89	636399	CC	TC	Intergenic	111909 / 308930	intergenic_region													intergenic_region|MODIFIER|DAPPUDRAFT_111909-DAPPUDRAFT_308930|DAPPUDRAFT_111909-DAPPUDRAFT_308930|intergenic_region|DAPPUDRAFT_111909-DAPPUDRAFT_308930|||n.636400C>T||||||
53	C008	Metal-free control	Hom-Het	89	636401	TT	AT	Intergenic	111909 / 308930	intergenic_region													intergenic_region|MODIFIER|DAPPUDRAFT_111909-DAPPUDRAFT_308930|DAPPUDRAFT_111909-DAPPUDRAFT_308930|intergenic_region|DAPPUDRAFT_111909-DAPPUDRAFT_308930|||n.636402T>A||||||
54	C008	Metal-free control	Hom-Het	95	146079	CC	TC	Intergenic	256617	upstream_gene_variant													upstream_gene_variant|MODIFIER|DAPPUDRAFT_256617|DAPPUDRAFT_256617|transcript|EFX70820.1|protein_coding||c.-3723G>A|||||3723|,T|upstream_gene_variant|MODIFIER|DAPPUDRAFT_256618|DAPPUDRAFT_256618|transcript|EFX70768.1|protein_coding||c.-930C>T|||||930|,T|upstream_gene_variant|MODIFIER|DAPPUDRAFT_112349|DAPPUDRAFT_112349|transcript|EFX70769.1|protein_coding||c.-2810C>T|||||2810|,T|intergenic_region…
55	C008	Metal-free control	Hom-Het	111	245350	CC	CT	Exonic	TXSB	missense_variant													missense_variant|MODERATE|TXSB|DAPPUDRAFT_328913|transcript|EFX69625.1|protein_coding|8/10|c.910C>T|p.Leu304Phe|1042/1707|910/1503|304/500||,T|upstream_gene_variant|MODIFIER|DAPPUDRAFT_328912|DAPPUDRAFT_328912|transcript|EFX69656.1|protein_coding||c.-3492G>A|||||3492|,T|upstream_gene_variant|MODIFIER|DAPPUDRAFT_328915|DAPPUDRAFT_328915|transcript|EFX69626.1|protein_coding||c.-3283C>T|||||3202|,T|…
56	C008	Metal-free control	Hom-Het	186	146613	CC	TC	Intergenic	19657 / 116484	intergenic_region													intergenic_region|MODIFIER|DAPPUDRAFT_18657-DAPPUDRAFT_116484|DAPPUDRAFT_18657-DAPPUDRAFT_116484|intergenic_region|DAPPUDRAFT_18657-DAPPUDRAFT_116484|||n.146614C>T||||||
57	C012	Metal-free control	Hom-Het	2	3537733	GG	AG	Intronic	220651	3_prime_UTR_variant													3_prime_UTR_variant|MODIFIER|DAPPUDRAFT_220651|DAPPUDRAFT_220651|transcript|EFX89528.1|protein_coding|17/17|c.*60C>T|||||60|,A|upstream_gene_variant|MODIFIER|DAPPUDRAFT_190908|DAPPUDRAFT_190908|transcript|EFX89529.1|protein_coding||c.-1402C>T|||||1183|,A|downstream_gene_variant|MODIFIER|DAPPUDRAFT_190910|DAPPUDRAFT_190910|transcript|EFX89488.1|protein_coding||c.*170G>A|||||135|,A|downstream_gene_…
58	C012	Metal-free control	Hom-Het	23	198416	GG	GA	Exonic	317988	synonymous_variant													synonymous_variant|LOW|DAPPUDRAFT_317988|DAPPUDRAFT_317988|transcript|EFX81052.1|protein_coding|30/32|c.5451C>T|p.Phe1817Phe|5451/5802|5451/5802|1817/1933||,A|upstream_gene_variant|MODIFIER|DAPPUDRAFT_196379|DAPPUDRAFT_196379|transcript|EFX81054.1|protein_coding||c.-4537C>T|||||4478|,A|upstream_gene_variant|MODIFIER|DAPPUDRAFT_303715|DAPPUDRAFT_303715|transcript|EFX81053.1|protein_coding||c.-1298…
59	C012	Metal-free control	Hom-Het	60	56366	GG	AG	Intergenic	307200	upstream_gene_variant													upstream_gene_variant|MODIFIER|DAPPUDRAFT_307200|DAPPUDRAFT_307200|transcript|EFX74642.1|protein_coding||c.-2458C>T|||||2424|,A|upstream_gene_variant|MODIFIER|DAPPUDRAFT_251639|DAPPUDRAFT_251639|transcript|EFX74516.1|protein_coding||c.-285G>A|||||285|,A|upstream_gene_variant|MODIFIER|DAPPUDRAFT_307174|DAPPUDRAFT_307174|transcript|EFX74517.1|protein_coding||c.-3085G>A|||||2898|,A|downstream_gene_v…
60	C012	Metal-free control	Hom-Het	65	243714	GG	AG	Intergenic	200371	upstream_gene_variant													upstream_gene_variant|MODIFIER|DAPPUDRAFT_200371|DAPPUDRAFT_200371|transcript|EFX73945.1|protein_coding||c.-1911C>T|||||1911|,A|upstream_gene_variant|MODIFIER|DAPPUDRAFT_188858|DAPPUDRAFT_188858|transcript|EFX73853.1|protein_coding||c.-203G>A|||||203|,A|downstream_gene_variant|MODIFIER|DAPPUDRAFT_215380|DAPPUDRAFT_215380|transcript|EFX73852.1|protein_coding||c.*4934G>A|||||4771|,A|intergenic_regi…
61	C012	Metal-free control	Hom-Het	236	93345	TT	GT	Intergenic	265068	upstream_gene_variant													upstream_gene_variant|MODIFIER|DAPPUDRAFT_265068|DAPPUDRAFT_265068|transcript|EFX65194.1|protein_coding||c.-3552A>C|||||3552|,G|upstream_gene_variant|MODIFIER|DAPPUDRAFT_265069|DAPPUDRAFT_265069|transcript|EFX65193.1|protein_coding||c.-2106A>C|||||2106|,G|intron_variant|MODIFIER|DAPPUDRAFT_333439|DAPPUDRAFT_333439|transcript|EFX65192.1|protein_coding|8/12|c.1208+44A>C||||||
62	C013	Metal-free control	Hom-Het	1	3967242	AA	TA	Intronic	205517	intron_variant													intron_variant|MODIFIER|DAPPUDRAFT_205517|DAPPUDRAFT_205517|transcript|EFX90195.1|protein_coding|7/9|c.2125-78T>A||||||
63	C013	Metal-free control	Hom-Het	9	1605105	GG	GA	Exonic	237423	missense_variant													missense_variant|MODERATE|DAPPUDRAFT_237423|DAPPUDRAFT_237423|transcript|EFX85920.1|protein_coding|1/3|c.37C>T|p.Arg13Cys|37/612|37/612|13/203||,A|upstream_gene_variant|MODIFIER|DAPPUDRAFT_237422|DAPPUDRAFT_237422|transcript|EFX85921.1|protein_coding||c.-3751C>T|||||3751|
64	C013	Metal-free control	Hom-Het	9	1836863	CC	CT	Intergenic	313721	upstream_gene_variant													upstream_gene_variant|MODIFIER|DAPPUDRAFT_313721|DAPPUDRAFT_313721|transcript|EFX85903.1|protein_coding||c.-322G>A|||||322|,T|upstream_gene_variant|MODIFIER|DAPPUDRAFT_127555|DAPPUDRAFT_127555|transcript|EFX85855.1|protein_coding||c.-1076C>T|||||1076|,T|downstream_gene_variant|MODIFIER|DAPPUDRAFT_313720|DAPPUDRAFT_313720|transcript|EFX85854.1|protein_coding||c.*2526C>T|||||2526|,T|downstream_gene…
65	C013	Metal-free control	Hom-Het	9	2037340	GG	GA	Intronic	21055	intron_variant													intron_variant|MODIFIER|DAPPUDRAFT_21055|DAPPUDRAFT_21055|transcript|EFX85867.1|protein_coding|2/5|c.278-2352G>A||||||WARNING_TRANSCRIPT_NO_STOP_CODON
66	C013	Metal-free control	Hom-Het	18	429259	TT	TG	Intergenic	tRNA-Leu	downstream_gene_variant													downstream_gene_variant|MODIFIER|tRNA-Leu|EMDPUG00000005247|transcript|EMDPUT00000005247.1|protein_coding||c.*1927T>G|||||1927|WARNING_TRANSCRIPT_MULTIPLE_STOP_CODONS,G|downstream_gene_variant|MODIFIER|DAPPUDRAFT_302602|DAPPUDRAFT_302602|transcript|EFX82438.1|protein_coding||c.*833A>C|||||627|,G|downstream_gene_variant|MODIFIER|DAPPUDRAFT_316689|DAPPUDRAFT_316689|transcript|EFX82437.1|protein_cod…
67	C013	Metal-free control	Hom-Het	39	921769	TT	GT	Intronic	321218	intron_variant													intron_variant|MODIFIER|DAPPUDRAFT_321218|DAPPUDRAFT_321218|transcript|EFX77703.1|protein_coding|2/9|c.297-1863A>C||||||
68	C013	Metal-free control	Hom-Het	56	133418	CC	CT	Intergenic	108237	upstream_gene_variant													upstream_gene_variant|MODIFIER|DAPPUDRAFT_108237|DAPPUDRAFT_108237|transcript|EFX75093.1|protein_coding||c.-542G>A|||||542|,T|intergenic_region|MODIFIER|DAPPUDRAFT_108237-DAPPUDRAFT_250993|DAPPUDRAFT_108237-DAPPUDRAFT_250993|intergenic_region|DAPPUDRAFT_108237-DAPPUDRAFT_250993|||n.133419C>T||||||
69	C013	Metal-free control	Hom-Het	56	463482	GG	AG	Intergenic	306921	upstream_gene_variant													upstream_gene_variant|MODIFIER|DAPPUDRAFT_306921|DAPPUDRAFT_306921|transcript|EFX75074.1|protein_coding||c.-1394C>T|||||1394|,A|upstream_gene_variant|MODIFIER|DAPPUDRAFT_306922|DAPPUDRAFT_306922|transcript|EFX75021.1|protein_coding||c.-1126G>A|||||1126|,A|intron_variant|MODIFIER|DAPPUDRAFT_226482|DAPPUDRAFT_226482|transcript|EFX75073.1|protein_coding|2/2|c.251+175C>T||||||
70	C013	Metal-free control	Hom-Het	62	701394	GG	GT	Intergenic	226844	upstream_gene_variant													upstream_gene_variant|MODIFIER|DAPPUDRAFT_226844|DAPPUDRAFT_226844|transcript|EFX74260.1|protein_coding||c.-4217G>T|||||4130|,T|intergenic_region|MODIFIER|DAPPUDRAFT_109099-DAPPUDRAFT_226844|DAPPUDRAFT_109099-DAPPUDRAFT_226844|intergenic_region|DAPPUDRAFT_109099-DAPPUDRAFT_226844|||n.701395G>T||||||
71	C013	Metal-free control	Hom-Het	73	265213	TT	CT	Intergenic	253910	upstream_gene_variant													upstream_gene_variant|MODIFIER|DAPPUDRAFT_253910|DAPPUDRAFT_253910|transcript|EFX72857.1|protein_coding||c.-4548A>G|||||4548|,C|downstream_gene_variant|MODIFIER|DAPPUDRAFT_253911|DAPPUDRAFT_253911|transcript|EFX72856.1|protein_coding||c.*2992A>G|||||2992|,C|intergenic_region|MODIFIER|DAPPUDRAFT_253910-DAPPUDRAFT_253911|DAPPUDRAFT_253910-DAPPUDRAFT_253911|intergenic_region|DAPPUDRAFT_253910-DAPPUD…
72	C013	Metal-free control	Hom-Het	98	366429	AA	AG	Intergenic	328077	upstream_gene_variant													upstream_gene_variant|MODIFIER|DAPPUDRAFT_328077|DAPPUDRAFT_328077|transcript|EFX70539.1|protein_coding||c.-3677T>C|||||3677|,G|upstream_gene_variant|MODIFIER|DAPPUDRAFT_328078|DAPPUDRAFT_328078|transcript|EFX70538.1|protein_coding||c.-2063T>C|||||2063|,G|intergenic_region|MODIFIER|DAPPUDRAFT_328078-DAPPUDRAFT_328080|DAPPUDRAFT_328078-DAPPUDRAFT_328080|intergenic_region|DAPPUDRAFT_328078-DAPPUDRA…
73	C013	Metal-free control	Hom-Het	114	252782	GG	AG	Intergenic	30479	upstream_gene_variant													upstream_gene_variant|MODIFIER|DAPPUDRAFT_30479|DAPPUDRAFT_30479|transcript|EFX69484.1|protein_coding||c.-2456C>T|||||2456|WARNING_TRANSCRIPT_NO_START_CODON,A|upstream_gene_variant|MODIFIER|DAPPUDRAFT_258568|DAPPUDRAFT_258568|transcript|EFX69483.1|protein_coding||c.-199C>T|||||199|,A|downstream_gene_variant|MODIFIER|DAPPUDRAFT_113639|DAPPUDRAFT_113639|transcript|EFX69482.1|protein_coding||c.*671C…
74	C013	Metal-free control	Hom-Het	160	130654	CC	CT	Intergenic	261890 / 331237	intergenic_region													intergenic_region|MODIFIER|DAPPUDRAFT_261890-DAPPUDRAFT_331237|DAPPUDRAFT_261890-DAPPUDRAFT_331237|intergenic_region|DAPPUDRAFT_261890-DAPPUDRAFT_331237|||n.130655C>T||||||
75	C013	Metal-free control	Hom-Het	1496	8968	TT	TA	Intergenic	120478	upstream_gene_variant													upstream_gene_variant|MODIFIER|DAPPUDRAFT_120478|DAPPUDRAFT_120478|transcript|EFX62148.1|protein_coding||c.-174A>T|||||174|,A|downstream_gene_variant|MODIFIER|DAPPUDRAFT_120477|DAPPUDRAFT_120477|transcript|EFX62147.1|protein_coding||c.*3929T>A|||||3929|,A|intergenic_region|MODIFIER|DAPPUDRAFT_120478-CHR_END|DAPPUDRAFT_120478-CHR_END|intergenic_region|DAPPUDRAFT_120478-CHR_END|||n.8969T>A||||||
76	C014	Metal-free control	Hom-Het	1	2796469	GG	AG	Intergenic	309898	upstream_gene_variant													upstream_gene_variant|MODIFIER|DAPPUDRAFT_309898|DAPPUDRAFT_309898|transcript|EFX90258.1|protein_coding||c.-2562C>T|||||2562|,A|upstream_gene_variant|MODIFIER|DAPPUDRAFT_230117|DAPPUDRAFT_230117|transcript|EFX90257.1|protein_coding||c.-1246C>T|||||1013|,A|upstream_gene_variant|MODIFIER|DAPPUDRAFT_94360|DAPPUDRAFT_94360|transcript|EFX90092.1|protein_coding||c.-7G>A|||||7|,A|intergenic_region|MODIF…
77	C014	Metal-free control	Hom-Het	1	3073235	GG	AG	Exonic	94409	synonymous_variant													synonymous_variant|LOW|DAPPUDRAFT_94409|DAPPUDRAFT_94409|transcript|EFX90238.1|protein_coding|7/9|c.2883C>T|p.Ala961Ala|2883/3537|2883/3537|961/1178||
78	C014	Metal-free control	Hom-Het	2	605587	GG	GA	Exonic	303118	synonymous_variant													synonymous_variant|LOW|DAPPUDRAFT_303118|DAPPUDRAFT_303118|transcript|EFX89780.1|protein_coding|3/8|c.1983C>T|p.Ala661Ala|1983/4997|1983/4629|661/1542||,A|upstream_gene_variant|MODIFIER|DAPPUDRAFT_187016|DAPPUDRAFT_187016|transcript|EFX89781.1|protein_coding||c.-3518C>T|||||3518|,A|downstream_gene_variant|MODIFIER|DAPPUDRAFT_40249|DAPPUDRAFT_40249|transcript|EFX89779.1|protein_coding||c.*4163C>T|…
79	C014	Metal-free control	Hom-Het	3	3139058	CC	GC	Intergenic	23392	upstream_gene_variant													upstream_gene_variant|MODIFIER|DAPPUDRAFT_23392|DAPPUDRAFT_23392|transcript|EFX88891.1|protein_coding||c.-3320G>C|||||3320|WARNING_TRANSCRIPT_NO_START_CODON,G|upstream_gene_variant|MODIFIER|DAPPUDRAFT_206496|DAPPUDRAFT_206496|transcript|EFX88765.1|protein_coding||c.-3145C>G|||||3071|,G|intergenic_region|MODIFIER|DAPPUDRAFT_23392-DAPPUDRAFT_206496|DAPPUDRAFT_23392-DAPPUDRAFT_206496|intergenic_regi…
80	C014	Metal-free control	Hom-Het	5	102492	GG	GT	Exonic	311854	missense_variant													missense_variant|MODERATE|DAPPUDRAFT_311854|DAPPUDRAFT_311854|transcript|EFX87838.1|protein_coding|9/26|c.4190C>A|p.Ala1397Asp|4190/9815|4190/9402|1397/3133||
81	C014	Metal-free control	Hom-Het	11	443853	AA	AG	Intronic	238184	intron_variant													intron_variant|MODIFIER|DAPPUDRAFT_238184|DAPPUDRAFT_238184|transcript|EFX85128.1|protein_coding|3/10|c.303-1302T>C||||||
82	C014	Metal-free control	Hom-Het	11	850029	AA	GA	Intergenic	99191	upstream_gene_variant													upstream_gene_variant|MODIFIER|DAPPUDRAFT_99191|DAPPUDRAFT_99191|transcript|EFX85087.1|protein_coding||c.-4016T>C|||||4016|,G|intron_variant|MODIFIER|DAPPUDRAFT_46327|DAPPUDRAFT_46327|transcript|EFX85086.1|protein_coding|7/9|c.1140+49T>C||||||
83	C014	Metal-free control	Hom-Het	17	824266	CC	CT	Intergenic	223674	downstream_gene_variant													downstream_gene_variant|MODIFIER|DAPPUDRAFT_223674|DAPPUDRAFT_223674|transcript|EFX82799.1|protein_coding||c.*1763G>A|||||1278|,T|intron_variant|MODIFIER|DAPPUDRAFT_302360|DAPPUDRAFT_302360|transcript|EFX82800.1|protein_coding|1/11|c.27-26G>A||||||
84	C014	Metal-free control	Hom-Het	65	682735	CC	CT	Intronic	307566	5_prime_UTR_premature_start_codon_gain_variant													5_prime_UTR_premature_start_codon_gain_variant|LOW|DAPPUDRAFT_307566|DAPPUDRAFT_307566|transcript|EFX73898.1|protein_coding|1/10|c.-2438G>A||||||,T|5_prime_UTR_variant|MODIFIER|DAPPUDRAFT_307566|DAPPUDRAFT_307566|transcript|EFX73898.1|protein_coding|1/10|c.-2438G>A|||||2438|
85	C014	Metal-free control	Hom-Het	93	154579	AA	AT	Intergenic	35689	upstream_gene_variant													upstream_gene_variant|MODIFIER|DAPPUDRAFT_35689|DAPPUDRAFT_35689|transcript|EFX70933.1|protein_coding||c.-51A>T|||||51|WARNING_TRANSCRIPT_NO_START_CODON,T|downstream_gene_variant|MODIFIER|DAPPUDRAFT_327625|DAPPUDRAFT_327625|transcript|EFX70932.1|protein_coding||c.*1155A>T|||||1155|,T|downstream_gene_variant|MODIFIER|DAPPUDRAFT_309254|DAPPUDRAFT_309254|transcript|EFX70986.1|protein_coding||c.*2119…
86	C016	Metal-free control	Hom-Het	8	2035678	GG	GA	Exonic	Gabbr1	missense_variant													missense_variant|MODERATE|Gabbr1|DAPPUDRAFT_193382|transcript|EFX86255.1|protein_coding|3/16|c.277G>A|p.Asp93Asn|517/2739|277/2499|93/832||,A|upstream_gene_variant|MODIFIER|DAPPUDRAFT_193379|DAPPUDRAFT_193379|transcript|EFX86306.1|protein_coding||c.-998C>T|||||830|,A|downstream_gene_variant|MODIFIER|DAPPUDRAFT_98152|DAPPUDRAFT_98152|transcript|EFX86253.1|protein_coding||c.*4643G>A|||||4643|,A|dow…
87	C016	Metal-free control	Hom-Het	17	1119949	CC	TC	Exonic	48987	missense_variant													missense_variant|MODERATE|DAPPUDRAFT_48987|DAPPUDRAFT_48987|transcript|EFX82655.1|protein_coding|1/10|c.56C>T|p.Ser19Phe|56/2685|56/2685|19/894||,T|upstream_gene_variant|MODIFIER|DAPPUDRAFT_316474|DAPPUDRAFT_316474|transcript|EFX82769.1|protein_coding||c.-3991G>A|||||3719|,T|upstream_gene_variant|MODIFIER|DAPPUDRAFT_240958|DAPPUDRAFT_240958|transcript|EFX82768.1|protein_coding||c.-1257G>A|||||125…
88	C016	Metal-free control	Hom-Het	24	467015	GG	GT	Intergenic	303826	upstream_gene_variant													upstream_gene_variant|MODIFIER|DAPPUDRAFT_303826|DAPPUDRAFT_303826|transcript|EFX80636.1|protein_coding||c.-1312G>T|||||890|,T|downstream_gene_variant|MODIFIER|DAPPUDRAFT_243206|DAPPUDRAFT_243206|transcript|EFX80635.1|protein_coding||c.*2047G>T|||||2047|,T|downstream_gene_variant|MODIFIER|DAPPUDRAFT_303902|DAPPUDRAFT_303902|transcript|EFX80815.1|protein_coding||c.*3887C>A|||||3499|,T|intergenic_r…
89	C016	Metal-free control	Hom-Het	56	330927	GG	GA	Intronic	306917	5_prime_UTR_variant													5_prime_UTR_variant|MODIFIER|DAPPUDRAFT_306917|DAPPUDRAFT_306917|transcript|EFX75087.1|protein_coding|1/7|c.-3586C>T|||||3586|
90	C016	Metal-free control	Hom-Het	78	456310	CC	TC	Exonic	110863	missense_variant													missense_variant|MODERATE|DAPPUDRAFT_110863|DAPPUDRAFT_110863|transcript|EFX72359.1|protein_coding|1/5|c.145C>T|p.Pro49Ser|145/1368|145/1368|49/455||
91	C017	Metal-free control	Hom-Het	9	647697	AA	CA	Intergenic	22045	downstream_gene_variant													downstream_gene_variant|MODIFIER|DAPPUDRAFT_22045|DAPPUDRAFT_22045|transcript|EFX85745.1|protein_coding||c.*2589A>C|||||2589|WARNING_TRANSCRIPT_NO_STOP_CODON,C|downstream_gene_variant|MODIFIER|DAPPUDRAFT_313508|DAPPUDRAFT_313508|transcript|EFX86015.1|protein_coding||c.*651T>G|||||651|,C|intergenic_region|MODIFIER|DAPPUDRAFT_22045-DAPPUDRAFT_313508|DAPPUDRAFT_22045-DAPPUDRAFT_313508|intergenic_reg…
92	C017	Metal-free control	Hom-Het	24	1282693	CC	CT	Exonic	318416	synonymous_variant													synonymous_variant|LOW|DAPPUDRAFT_318416|DAPPUDRAFT_318416|transcript|EFX80705.1|protein_coding|5/9|c.1392C>T|p.Leu464Leu|1392/5280|1392/5280|464/1759||,T|downstream_gene_variant|MODIFIER|DAPPUDRAFT_318415|DAPPUDRAFT_318415|transcript|EFX80703.1|protein_coding||c.*4687C>T|||||4687|,T|downstream_gene_variant|MODIFIER|DAPPUDRAFT_27344|DAPPUDRAFT_27344|transcript|EFX80704.1|protein_coding||c.*3075C>…
93	C017	Metal-free control	Hom-Het	78	503084	GG	GT	Intergenic	308316	upstream_gene_variant													upstream_gene_variant|MODIFIER|DAPPUDRAFT_308316|DAPPUDRAFT_308316|transcript|EFX72380.1|protein_coding||c.-1571C>A|||||1571|,T|upstream_gene_variant|MODIFIER|DAPPUDRAFT_254591|DAPPUDRAFT_254591|transcript|EFX72362.1|protein_coding||c.-1759G>T|||||1759|,T|intergenic_region|MODIFIER|DAPPUDRAFT_308316-DAPPUDRAFT_254591|DAPPUDRAFT_308316-DAPPUDRAFT_254591|intergenic_region|DAPPUDRAFT_308316-DAPPUDRA…
94	C017	Metal-free control	Hom-Het	206	52211	GG	GC	Intergenic	264108	upstream_gene_variant													upstream_gene_variant|MODIFIER|DAPPUDRAFT_264108|DAPPUDRAFT_264108|transcript|EFX65866.1|protein_coding||c.-4122C>G|||||4122|,C|intergenic_region|MODIFIER|DAPPUDRAFT_264108-DAPPUDRAFT_332766|DAPPUDRAFT_264108-DAPPUDRAFT_332766|intergenic_region|DAPPUDRAFT_264108-DAPPUDRAFT_332766|||n.52212G>C||||||
95	C017	Metal-free control	Hom-Het	241	79228	GG	GA	Intergenic	333508	downstream_gene_variant													downstream_gene_variant|MODIFIER|DAPPUDRAFT_333508|DAPPUDRAFT_333508|transcript|EFX65120.1|protein_coding||c.*3876G>A|||||3876|,A|intergenic_region|MODIFIER|DAPPUDRAFT_333508-DAPPUDRAFT_117545|DAPPUDRAFT_333508-DAPPUDRAFT_117545|intergenic_region|DAPPUDRAFT_333508-DAPPUDRAFT_117545|||n.79229G>A||||||
96	C018	Metal-free control	Hom-Het	1	1913702	GG	GA	Exonic	309722	synonymous_variant													synonymous_variant|LOW|DAPPUDRAFT_309722|DAPPUDRAFT_309722|transcript|EFX90007.1|protein_coding|1/4|c.189G>A|p.Ser63Ser|189/1838|189/1128|63/375||,A|downstream_gene_variant|MODIFIER|DAPPUDRAFT_309723|DAPPUDRAFT_309723|transcript|EFX90343.1|protein_coding||c.*2894C>T|||||2894|
97	C018	Metal-free control	Hom-Het	11	294479	CC	TC	Intronic	238167	intron_variant													intron_variant|MODIFIER|DAPPUDRAFT_238167|DAPPUDRAFT_238167|transcript|EFX84802.1|protein_coding|3/8|c.165+1129C>T||||||
98	C018	Metal-free control	Hom-Het	35	166675	GG	TG	Intergenic	225380	upstream_gene_variant													upstream_gene_variant|MODIFIER|DAPPUDRAFT_225380|DAPPUDRAFT_225380|transcript|EFX78558.1|protein_coding||c.-4914C>A|||||4914|,T|intergenic_region|MODIFIER|DAPPUDRAFT_225380-DAPPUDRAFT_105150|DAPPUDRAFT_225380-DAPPUDRAFT_105150|intergenic_region|DAPPUDRAFT_225380-DAPPUDRAFT_105150|||n.166676G>T||||||
99	C018	Metal-free control	Hom-Het	36	638452	CC	TC	Intronic	225476	5_prime_UTR_variant													5_prime_UTR_variant|MODIFIER|DAPPUDRAFT_225476|DAPPUDRAFT_225476|transcript|EFX78161.1|protein_coding|1/1|c.-206C>T|||||206|,T|upstream_gene_variant|MODIFIER|DAPPUDRAFT_246521|DAPPUDRAFT_246521|transcript|EFX78286.1|protein_coding||c.-4369G>A|||||4369|,T|upstream_gene_variant|MODIFIER|DAPPUDRAFT_105421|DAPPUDRAFT_105421|transcript|EFX78285.1|protein_coding||c.-281G>A|||||281|,T|upstream_gene_vari…
100	C018	Metal-free control	Hom-Het	44	785244	TT	GT	Intergenic	322046	upstream_gene_variant													upstream_gene_variant|MODIFIER|DAPPUDRAFT_322046|DAPPUDRAFT_322046|transcript|EFX76854.1|protein_coding||c.-4187A>C|||||4187|,G|intergenic_region|MODIFIER|DAPPUDRAFT_322046-DAPPUDRAFT_322048|DAPPUDRAFT_322046-DAPPUDRAFT_322048|intergenic_region|DAPPUDRAFT_322046-DAPPUDRAFT_322048|||n.785245T>G||||||
101	C018	Metal-free control	Hom-Het	48	469699	GG	AG	Exonic	322596	missense_variant													missense_variant|MODERATE|DAPPUDRAFT_322596|DAPPUDRAFT_322596|transcript|EFX76101.1|protein_coding|4/6|c.476G>A|p.Arg159Gln|476/705|476/705|159/234||
102	C018	Metal-free control	Hom-Het	53	296941	CC	CT	Intergenic	214409	upstream_gene_variant													upstream_gene_variant|MODIFIER|DAPPUDRAFT_214409|DAPPUDRAFT_214409|transcript|EFX75478.1|protein_coding||c.-2114G>A|||||2017|WARNING_TRANSCRIPT_NO_STOP_CODON,T|upstream_gene_variant|MODIFIER|DAPPUDRAFT_290551|DAPPUDRAFT_290551|transcript|EFX75395.2|protein_coding||c.-4599C>T|||||4599|,T|upstream_gene_variant|MODIFIER|DAPPUDRAFT_290551|DAPPUDRAFT_290551|transcript|EFX75394.2|protein_coding||c.-459…
103	C018	Metal-free control	Hom-Het	74	512568	CC	TC	Intergenic	254070	upstream_gene_variant													upstream_gene_variant|MODIFIER|DAPPUDRAFT_254070|DAPPUDRAFT_254070|transcript|EFX72777.1|protein_coding||c.-3331G>A|||||3331|,T|upstream_gene_variant|MODIFIER|DAPPUDRAFT_254073|DAPPUDRAFT_254073|transcript|EFX72768.1|protein_coding||c.-901C>T|||||901|,T|intergenic_region|MODIFIER|DAPPUDRAFT_254070-DAPPUDRAFT_254073|DAPPUDRAFT_254070-DAPPUDRAFT_254073|intergenic_region|DAPPUDRAFT_254070-DAPPUDRAFT…
104	C018	Metal-free control	Hom-Het	106	208044	AA	AG	Exonic	328636	missense_variant													missense_variant|MODERATE|DAPPUDRAFT_328636|DAPPUDRAFT_328636|transcript|EFX69902.1|protein_coding|3/21|c.617A>G|p.Lys206Arg|617/4154|617/4107|206/1368||,G|upstream_gene_variant|MODIFIER|DAPPUDRAFT_300640|DAPPUDRAFT_300640|transcript|EFX69931.1|protein_coding||c.-1035T>C|||||883|,G|downstream_gene_variant|MODIFIER|DAPPUDRAFT_228516|DAPPUDRAFT_228516|transcript|EFX69901.1|protein_coding||c.*3224A>…
105	C018	Metal-free control	Hom-Het	128	63510	CC	AC	Intronic	259734	intron_variant													intron_variant|MODIFIER|DAPPUDRAFT_259734|DAPPUDRAFT_259734|transcript|EFX68680.1|protein_coding|9/11|c.524-319C>A||||||
106	C020	Metal-free control	Hom-Het	5	2334164	CC	CA	Exonic	306572	synonymous_variant													synonymous_variant|LOW|DAPPUDRAFT_306572|DAPPUDRAFT_306572|transcript|EFX87630.1|protein_coding|3/18|c.870C>A|p.Ala290Ala|870/7665|870/7665|290/2554||
107	C020	Metal-free control	Hom-Het	11	122229	GG	AG	Intergenic	238131	downstream_gene_variant													downstream_gene_variant|MODIFIER|DAPPUDRAFT_238131|DAPPUDRAFT_238131|transcript|EFX85152.1|protein_coding||c.*290C>T|||||290|,A|intergenic_region|MODIFIER|DAPPUDRAFT_314309-DAPPUDRAFT_238131|DAPPUDRAFT_314309-DAPPUDRAFT_238131|intergenic_region|DAPPUDRAFT_314309-DAPPUDRAFT_238131|||n.122230G>A||||||
108	C020	Metal-free control	Hom-Het	32	668995	TT	TC	Exonic	305004	missense_variant													missense_variant|MODERATE|DAPPUDRAFT_305004|DAPPUDRAFT_305004|transcript|EFX79056.1|protein_coding|2/3|c.46A>G|p.Ile16Val|95/622|46/408|16/135||,C|downstream_gene_variant|MODIFIER|DAPPUDRAFT_319941|DAPPUDRAFT_319941|transcript|EFX79002.1|protein_coding||c.*1659T>C|||||1313|,C|downstream_gene_variant|MODIFIER|DAPPUDRAFT_305044|DAPPUDRAFT_305044|transcript|EFX79055.1|protein_coding||c.*1648A>G|||||…
109	C020	Metal-free control	Hom-Het	32	867759	GG	GT	Intergenic	245437 / 305006	intergenic_region													intergenic_region|MODIFIER|DAPPUDRAFT_245437-DAPPUDRAFT_305006|DAPPUDRAFT_245437-DAPPUDRAFT_305006|intergenic_region|DAPPUDRAFT_245437-DAPPUDRAFT_305006|||n.867760G>T||||||
110	C020	Metal-free control	Hom-Het	36	399322	GG	GA	Intergenic	246453	upstream_gene_variant													upstream_gene_variant|MODIFIER|DAPPUDRAFT_246453|DAPPUDRAFT_246453|transcript|EFX78317.1|protein_coding||c.-3948C>T|||||3948|,A|upstream_gene_variant|MODIFIER|DAPPUDRAFT_320590|DAPPUDRAFT_320590|transcript|EFX78316.1|protein_coding||c.-298C>T|||||298|,A|downstream_gene_variant|MODIFIER|DAPPUDRAFT_320591|DAPPUDRAFT_320591|transcript|EFX78315.1|protein_coding||c.*773C>T|||||773|,A|downstream_gene_v…
111	C020	Metal-free control	Hom-Het	58	397448	AA	TA	Intronic	30674	intron_variant													intron_variant|MODIFIER|DAPPUDRAFT_30674|DAPPUDRAFT_30674|transcript|EFX74789.1|protein_coding|1/6|c.119-240A>T||||||WARNING_TRANSCRIPT_NO_START_CODON
112	C021	Metal-free control	Hom-Het	1	1948270	CC	CA	Exonic	232322	missense_variant													missense_variant|MODERATE|DAPPUDRAFT_232322|DAPPUDRAFT_232322|transcript|EFX90011.1|protein_coding|1/7|c.41C>A|p.Pro14Gln|41/2700|41/2700|14/899||,A|upstream_gene_variant|MODIFIER|DAPPUDRAFT_309733|DAPPUDRAFT_309733|transcript|EFX90338.1|protein_coding||c.-4721G>T|||||4721|,A|upstream_gene_variant|MODIFIER|DAPPUDRAFT_309734|DAPPUDRAFT_309734|transcript|EFX90337.1|protein_coding||c.-1261G>T|||||12…
113	C021	Metal-free control	Hom-Het	5	1634937	CC	CT	Intergenic	306416 / 43166	intergenic_region													intergenic_region|MODIFIER|DAPPUDRAFT_306416-DAPPUDRAFT_43166|DAPPUDRAFT_306416-DAPPUDRAFT_43166|intergenic_region|DAPPUDRAFT_306416-DAPPUDRAFT_43166|||n.1634938C>T||||||
114	C021	Metal-free control	Hom-Het	6	971589	CC	AC	Exonic	312411	missense_variant													missense_variant|MODERATE|DAPPUDRAFT_312411|DAPPUDRAFT_312411|transcript|EFX87356.1|protein_coding|1/5|c.7G>T|p.Asp3Tyr|7/1920|7/1920|3/639||,A|downstream_gene_variant|MODIFIER|DAPPUDRAFT_207744|DAPPUDRAFT_207744|transcript|EFX86956.1|protein_coding||c.*2393C>A|||||2379|,A|downstream_gene_variant|MODIFIER|DAPPUDRAFT_235760|DAPPUDRAFT_235760|transcript|EFX87355.1|protein_coding||c.*2118G>T|||||211…
115	C021	Metal-free control	Hom-Het	10	1849931	GG	AG	Exonic	300453	missense_variant													missense_variant|MODERATE|DAPPUDRAFT_300453|DAPPUDRAFT_300453|transcript|EFX85392.1|protein_coding|4/9|c.1372G>A|p.Ala458Thr|1372/7295|1372/6834|458/2277||
116	C021	Metal-free control	Hom-Het	20	250627	CC	TC	Intergenic	317231	upstream_gene_variant													upstream_gene_variant|MODIFIER|DAPPUDRAFT_317231|DAPPUDRAFT_317231|transcript|EFX81607.1|protein_coding||c.-2638C>T|||||2638|,T|downstream_gene_variant|MODIFIER|DAPPUDRAFT_224067|DAPPUDRAFT_224067|transcript|EFX81606.1|protein_coding||c.*2849C>T|||||2340|,T|intergenic_region|MODIFIER|DAPPUDRAFT_224067-DAPPUDRAFT_317231|DAPPUDRAFT_224067-DAPPUDRAFT_317231|intergenic_region|DAPPUDRAFT_224067-DAPPUD…
117	C021	Metal-free control	Hom-Het	27	474288	CC	TC	Intergenic	244150	upstream_gene_variant													upstream_gene_variant|MODIFIER|DAPPUDRAFT_244150|DAPPUDRAFT_244150|transcript|EFX79958.1|protein_coding||c.-1232C>T|||||1232|,T|downstream_gene_variant|MODIFIER|DAPPUDRAFT_244149|DAPPUDRAFT_244149|transcript|EFX79957.1|protein_coding||c.*3818C>T|||||3818|,T|intergenic_region|MODIFIER|DAPPUDRAFT_244149-DAPPUDRAFT_244150|DAPPUDRAFT_244149-DAPPUDRAFT_244150|intergenic_region|DAPPUDRAFT_244149-DAPPUD…
118	C021	Metal-free control	Hom-Het	37	699165	GG	GA	Intergenic	320886 / 305274	intergenic_region													intergenic_region|MODIFIER|DAPPUDRAFT_320886-DAPPUDRAFT_305274|DAPPUDRAFT_320886-DAPPUDRAFT_305274|intergenic_region|DAPPUDRAFT_320886-DAPPUDRAFT_305274|||n.699166G>A||||||
119	C021	Metal-free control	Hom-Het	46	878153	CC	CT	Intergenic	55072	upstream_gene_variant													upstream_gene_variant|MODIFIER|DAPPUDRAFT_55072|DAPPUDRAFT_55072|transcript|EFX76473.1|protein_coding||c.-2415G>A|||||2415|WARNING_TRANSCRIPT_NO_STOP_CODON,T|downstream_gene_variant|MODIFIER|DAPPUDRAFT_107054|DAPPUDRAFT_107054|transcript|EFX76472.1|protein_coding||c.*1620G>A|||||1620|,T|intergenic_region|MODIFIER|DAPPUDRAFT_55072-DAPPUDRAFT_107054|DAPPUDRAFT_55072-DAPPUDRAFT_107054|intergenic_reg…
120	C021	Metal-free control	Hom-Het	124	371883	CC	TC	Intergenic	114174	upstream_gene_variant													upstream_gene_variant|MODIFIER|DAPPUDRAFT_114174|DAPPUDRAFT_114174|transcript|EFX68904.1|protein_coding||c.-1875C>T|||||1875|,T|intergenic_region|MODIFIER|DAPPUDRAFT_114173-DAPPUDRAFT_114174|DAPPUDRAFT_114173-DAPPUDRAFT_114174|intergenic_region|DAPPUDRAFT_114173-DAPPUDRAFT_114174|||n.371884C>T||||||
121	C021	Metal-free control	Hom-Het	5023	1366	CC	CT	Intergenic	-	intergenic_region													intergenic_region|MODIFIER|||||||||||||
122	C023	Metal-free control	Hom-Het	12	2101218	AA	TA	Intergenic	314923	upstream_gene_variant													upstream_gene_variant|MODIFIER|DAPPUDRAFT_314923|DAPPUDRAFT_314923|transcript|EFX84577.1|protein_coding||c.-4376T>A|||||4376|,T|downstream_gene_variant|MODIFIER|DAPPUDRAFT_314924|DAPPUDRAFT_314924|transcript|EFX84562.1|protein_coding||c.*398A>T|||||398|,T|intergenic_region|MODIFIER|DAPPUDRAFT_314924-DAPPUDRAFT_314926|DAPPUDRAFT_314924-DAPPUDRAFT_314926|intergenic_region|DAPPUDRAFT_314924-DAPPUDRA…
123	C023	Metal-free control	Hom-Het	34	885717	AA	AG	Intronic	246016	splice_acceptor_variant&intron_variant													splice_acceptor_variant&intron_variant|HIGH|DAPPUDRAFT_246016|DAPPUDRAFT_246016|transcript|EFX78636.1|protein_coding|3/3|c.205-2A>G||||||
124	C023	Metal-free control	Hom-Het	76	382265	TT	TG	Intronic	254308	intron_variant													intron_variant|MODIFIER|DAPPUDRAFT_254308|DAPPUDRAFT_254308|transcript|EFX72558.1|protein_coding|9/11|c.1971+474T>G||||||
125	C024	Metal-free control	Hom-Het	6	1158701	AA	GA	Exonic	307126	missense_variant													missense_variant|MODERATE|DAPPUDRAFT_307126|DAPPUDRAFT_307126|transcript|EFX86989.1|protein_coding|14/21|c.2195A>G|p.Asn732Ser|2195/3554|2195/3516|732/1171||,G|upstream_gene_variant|MODIFIER|DAPPUDRAFT_312475|DAPPUDRAFT_312475|transcript|EFX86990.1|protein_coding||c.-2328A>G|||||2328|,G|downstream_gene_variant|MODIFIER|DAPPUDRAFT_312473|DAPPUDRAFT_312473|transcript|EFX86988.1|protein_coding||c.*3…
126	C024	Metal-free control	Hom-Het	20	115782	GG	GT	Intergenic	317204	upstream_gene_variant													upstream_gene_variant|MODIFIER|DAPPUDRAFT_317204|DAPPUDRAFT_317204|transcript|EFX81593.1|protein_coding||c.-4163G>T|||||4163|,T|downstream_gene_variant|MODIFIER|DAPPUDRAFT_241855|DAPPUDRAFT_241855|transcript|EFX81854.1|protein_coding||c.*1814C>A|||||1814|,T|intergenic_region|MODIFIER|DAPPUDRAFT_102056-DAPPUDRAFT_241855|DAPPUDRAFT_102056-DAPPUDRAFT_241855|intergenic_region|DAPPUDRAFT_102056-DAPPUD…
127	C024	Metal-free control	Hom-Het	52	479362	CC	CT	Intergenic	323200	downstream_gene_variant													downstream_gene_variant|MODIFIER|DAPPUDRAFT_323200|DAPPUDRAFT_323200|transcript|EFX75617.1|protein_coding||c.*370G>A|||||370|,T|intergenic_region|MODIFIER|DAPPUDRAFT_323198-DAPPUDRAFT_323200|DAPPUDRAFT_323198-DAPPUDRAFT_323200|intergenic_region|DAPPUDRAFT_323198-DAPPUDRAFT_323200|||n.479363C>T||||||
128	C024	Metal-free control	Hom-Het	76	177645	CC	CA	Intergenic	308201	upstream_gene_variant													upstream_gene_variant|MODIFIER|DAPPUDRAFT_308201|DAPPUDRAFT_308201|transcript|EFX72546.1|protein_coding||c.-300C>A|||||300|,A|upstream_gene_variant|MODIFIER|DAPPUDRAFT_308171|DAPPUDRAFT_308171|transcript|EFX72547.1|protein_coding||c.-2986C>A|||||2794|,A|upstream_gene_variant|MODIFIER|DAPPUDRAFT_308202|DAPPUDRAFT_308202|transcript|EFX72548.1|protein_coding||c.-3844C>A|||||3826|,A|intergenic_region…
129	C024	Metal-free control	Hom-Het	87	11086	GG	GA	Intergenic	60056	downstream_gene_variant													downstream_gene_variant|MODIFIER|DAPPUDRAFT_60056|DAPPUDRAFT_60056|transcript|EFX71434.1|protein_coding||c.*190G>A|||||190|,A|intergenic_region|MODIFIER|DAPPUDRAFT_60056-DAPPUDRAFT_255601|DAPPUDRAFT_60056-DAPPUDRAFT_255601|intergenic_region|DAPPUDRAFT_60056-DAPPUDRAFT_255601|||n.11087G>A||||||
130	C024	Metal-free control	Hom-Het	129	45809	CC	CT	Intergenic	329874	upstream_gene_variant													upstream_gene_variant|MODIFIER|DAPPUDRAFT_329874|DAPPUDRAFT_329874|transcript|EFX68669.1|protein_coding||c.-1258G>A|||||1258|,T|intergenic_region|MODIFIER|DAPPUDRAFT_329874-DAPPUDRAFT_301272|DAPPUDRAFT_329874-DAPPUDRAFT_301272|intergenic_region|DAPPUDRAFT_329874-DAPPUDRAFT_301272|||n.45810C>T||||||
131	C024	Metal-free control	Hom-Het	151	224605	TT	TC	Intergenic	330892 / 261390	intergenic_region													intergenic_region|MODIFIER|DAPPUDRAFT_330892-DAPPUDRAFT_261390|DAPPUDRAFT_330892-DAPPUDRAFT_261390|intergenic_region|DAPPUDRAFT_330892-DAPPUDRAFT_261390|||n.224606T>C||||||
132	C024	Metal-free control	Hom-Het	289	65185	AA	AG	Intergenic	8242	upstream_gene_variant													upstream_gene_variant|MODIFIER|DAPPUDRAFT_8242|DAPPUDRAFT_8242|transcript|EFX64620.1|protein_coding||c.-4182A>G|||||4182|WARNING_TRANSCRIPT_NO_STOP_CODON,G|upstream_gene_variant|MODIFIER|DAPPUDRAFT_130537|DAPPUDRAFT_130537|transcript|EFX64621.1|protein_coding||c.-4462A>G|||||4462|,G|intergenic_region|MODIFIER|DAPPUDRAFT_334011-DAPPUDRAFT_8242|DAPPUDRAFT_334011-DAPPUDRAFT_8242|intergenic_region|DA…
133	C024	Metal-free control	Hom-Het	452	7587	AA	CA	Intergenic	334952	upstream_gene_variant													upstream_gene_variant|MODIFIER|DAPPUDRAFT_334952|DAPPUDRAFT_334952|transcript|EFX63826.1|protein_coding||c.-771T>G|||||771|,C|upstream_gene_variant|MODIFIER|DAPPUDRAFT_306115|DAPPUDRAFT_306115|transcript|EFX63821.1|protein_coding||c.-3088A>C|||||3088|,C|downstream_gene_variant|MODIFIER|DAPPUDRAFT_93831|DAPPUDRAFT_93831|transcript|EFX63819.1|protein_coding||c.*3729A>C|||||3729|,C|downstream_gene_v…
134	C025	Metal-free control	Hom-Het	1	838076	CC	CG	Intergenic	300025 / 299813	intergenic_region													intergenic_region|MODIFIER|DAPPUDRAFT_300025-DAPPUDRAFT_299813|DAPPUDRAFT_300025-DAPPUDRAFT_299813|intergenic_region|DAPPUDRAFT_300025-DAPPUDRAFT_299813|||n.838077C>G||||||
135	C025	Metal-free control	Hom-Het	4	718243	CC	GC	Intergenic	311352	downstream_gene_variant													downstream_gene_variant|MODIFIER|DAPPUDRAFT_311352|DAPPUDRAFT_311352|transcript|EFX88405.1|protein_coding||c.*4060G>C|||||4060|,G|intron_variant|MODIFIER|DAPPUDRAFT_311351|DAPPUDRAFT_311351|transcript|EFX87919.1|protein_coding|2/5|c.284+1703C>G||||||
136	C025	Metal-free control	Hom-Het	10	1201744	GG	TG	Exonic	98857	missense_variant													missense_variant|MODERATE|DAPPUDRAFT_98857|DAPPUDRAFT_98857|transcript|EFX85539.1|protein_coding|1/2|c.174C>A|p.Phe58Leu|174/2904|174/2904|58/967||,T|downstream_gene_variant|MODIFIER|DAPPUDRAFT_237855|DAPPUDRAFT_237855|transcript|EFX85538.1|protein_coding||c.*4626C>A|||||4626|
137	C025	Metal-free control	Hom-Het	10	1671942	TT	TC	Intronic	20190	intron_variant													intron_variant|MODIFIER|DAPPUDRAFT_20190|DAPPUDRAFT_20190|transcript|EFX85379.1|protein_coding|7/18|c.969+133T>C||||||WARNING_TRANSCRIPT_NO_START_CODON
138	C025	Metal-free control	Hom-Het	12	162205	CC	TC	Intergenic	46926	upstream_gene_variant													upstream_gene_variant|MODIFIER|DAPPUDRAFT_46926|DAPPUDRAFT_46926|transcript|EFX84751.1|protein_coding||c.-545G>A|||||545|WARNING_TRANSCRIPT_NO_START_CODON,T|intergenic_region|MODIFIER|DAPPUDRAFT_46926-DAPPUDRAFT_238585|DAPPUDRAFT_46926-DAPPUDRAFT_238585|intergenic_region|DAPPUDRAFT_46926-DAPPUDRAFT_238585|||n.162206C>T||||||
139	C025	Metal-free control	Hom-Het	25	966213	CC	TC	Intergenic	51340	downstream_gene_variant													downstream_gene_variant|MODIFIER|DAPPUDRAFT_51340|DAPPUDRAFT_51340|transcript|EFX80511.1|protein_coding||c.*2373G>A|||||2373|WARNING_TRANSCRIPT_NO_STOP_CODON,T|downstream_gene_variant|MODIFIER|DAPPUDRAFT_103469|DAPPUDRAFT_103469|transcript|EFX80510.1|protein_coding||c.*3968G>A|||||3968|WARNING_TRANSCRIPT_NO_STOP_CODON,T|intergenic_region|MODIFIER|DAPPUDRAFT_304036-DAPPUDRAFT_51340|DAPPUDRAFT_3040…
140	C025	Metal-free control	Hom-Het	40	198251	AA	AG	Exonic	106003	missense_variant													missense_variant|MODERATE|DAPPUDRAFT_106003|DAPPUDRAFT_106003|transcript|EFX77579.1|protein_coding|2/2|c.919T>C|p.Phe307Leu|919/1191|919/1191|307/396||,G|upstream_gene_variant|MODIFIER|DAPPUDRAFT_247464|DAPPUDRAFT_247464|transcript|EFX77581.1|protein_coding||c.-1439T>C|||||1439|,G|upstream_gene_variant|MODIFIER|DAPPUDRAFT_9448|DAPPUDRAFT_9448|transcript|EFX77580.1|protein_coding||c.-1246T>C|||||1…
141	C025	Metal-free control	Hom-Het	47	881273	CC	CA	Intergenic	249245	upstream_gene_variant													upstream_gene_variant|MODIFIER|DAPPUDRAFT_249245|DAPPUDRAFT_249245|transcript|EFX76304.1|protein_coding||c.-3893C>A|||||3893|,A|downstream_gene_variant|MODIFIER|DAPPUDRAFT_249242|DAPPUDRAFT_249242|transcript|EFX76303.1|protein_coding||c.*399C>A|||||399|,A|intergenic_region|MODIFIER|DAPPUDRAFT_249242-DAPPUDRAFT_249245|DAPPUDRAFT_249242-DAPPUDRAFT_249245|intergenic_region|DAPPUDRAFT_249242-DAPPUDRA…
142	C025	Metal-free control	Hom-Het	57	384185	CC	CT	Intergenic	251247	downstream_gene_variant													downstream_gene_variant|MODIFIER|DAPPUDRAFT_251247|DAPPUDRAFT_251247|transcript|EFX74969.1|protein_coding||c.*4218G>A|||||4218|,T|intergenic_region|MODIFIER|DAPPUDRAFT_108378-DAPPUDRAFT_251247|DAPPUDRAFT_108378-DAPPUDRAFT_251247|intergenic_region|DAPPUDRAFT_108378-DAPPUDRAFT_251247|||n.384186C>T||||||
143	C025	Metal-free control	Hom-Het	62	43502	CC	TC	Intergenic	251987 / 57291	intergenic_region													intergenic_region|MODIFIER|DAPPUDRAFT_251987-DAPPUDRAFT_57291|DAPPUDRAFT_251987-DAPPUDRAFT_57291|intergenic_region|DAPPUDRAFT_251987-DAPPUDRAFT_57291|||n.43503C>T||||||
144	C025	Metal-free control	Hom-Het	63	645199	TT	TA	Intergenic	HB	intergenic_region													intergenic_region|MODIFIER|HB-DAPPUDRAFT_307489|DAPPUDRAFT_109235-DAPPUDRAFT_307489|intergenic_region|DAPPUDRAFT_109235-DAPPUDRAFT_307489|||n.645200T>A||||||
145	C025	Metal-free control	Hom-Het	64	491817	AA	TA	Intergenic	324742	downstream_gene_variant													downstream_gene_variant|MODIFIER|DAPPUDRAFT_324742|DAPPUDRAFT_324742|transcript|EFX73992.1|protein_coding||c.*4876A>T|||||4876|,T|downstream_gene_variant|MODIFIER|DAPPUDRAFT_252394|DAPPUDRAFT_252394|transcript|EFX73993.1|protein_coding||c.*3482A>T|||||3482|,T|downstream_gene_variant|MODIFIER|DAPPUDRAFT_324745|DAPPUDRAFT_324745|transcript|EFX73994.1|protein_coding||c.*821A>T|||||821|,T|downstream_…
146	C025	Metal-free control	Hom-Het	81	384105	AA	TA	Intergenic	326628 / 326630	intergenic_region													intergenic_region|MODIFIER|DAPPUDRAFT_326628-DAPPUDRAFT_326630|DAPPUDRAFT_326628-DAPPUDRAFT_326630|intergenic_region|DAPPUDRAFT_326628-DAPPUDRAFT_326630|||n.384106A>T||||||
147	C025	Metal-free control	Hom-Het	99	208098	GG	GA	Intergenic	309438	upstream_gene_variant													upstream_gene_variant|MODIFIER|DAPPUDRAFT_309438|DAPPUDRAFT_309438|transcript|EFX70458.1|protein_coding||c.-2235C>T|||||2133|,A|upstream_gene_variant|MODIFIER|DAPPUDRAFT_328331|DAPPUDRAFT_328331|transcript|EFX70418.1|protein_coding||c.-1127G>A|||||1127|,A|upstream_gene_variant|MODIFIER|DAPPUDRAFT_328332|DAPPUDRAFT_328332|transcript|EFX70419.1|protein_coding||c.-4626G>A|||||4626|,A|downstream_gene…
148	C025	Metal-free control	Hom-Het	173	134058	CC	CA	Intergenic	130325	upstream_gene_variant													upstream_gene_variant|MODIFIER|DAPPUDRAFT_130325|DAPPUDRAFT_130325|transcript|EFX66737.1|protein_coding||c.-47C>A|||||47|,A|upstream_gene_variant|MODIFIER|DAPPUDRAFT_331763|DAPPUDRAFT_331763|transcript|EFX66738.1|protein_coding||c.-2733C>A|||||2733|,A|upstream_gene_variant|MODIFIER|DAPPUDRAFT_302454|DAPPUDRAFT_302454|transcript|EFX66739.1|protein_coding||c.-3863C>A|||||3766|,A|downstream_gene_var…
149	C025	Metal-free control	Hom-Het	228	43838	GG	GT	Intergenic	333266 / 117346	intergenic_region													intergenic_region|MODIFIER|DAPPUDRAFT_333266-DAPPUDRAFT_117346|DAPPUDRAFT_333266-DAPPUDRAFT_117346|intergenic_region|DAPPUDRAFT_333266-DAPPUDRAFT_117346|||n.43839G>T||||||
150	C027	Metal-free control	Hom-Het	6	134144	AA	AT	Intergenic	235547	downstream_gene_variant													downstream_gene_variant|MODIFIER|DAPPUDRAFT_235547|DAPPUDRAFT_235547|transcript|EFX86844.1|protein_coding||c.*4242A>T|||||4242|,T|downstream_gene_variant|MODIFIER|DAPPUDRAFT_235549|DAPPUDRAFT_235549|transcript|EFX86845.1|protein_coding||c.*520A>T|||||520|,T|downstream_gene_variant|MODIFIER|DAPPUDRAFT_96961|DAPPUDRAFT_96961|transcript|EFX87455.1|protein_coding||c.*574T>A|||||574|,T|intergenic_regi…
151	C027	Metal-free control	Hom-Het	11	7934	AA	TA	Exonic	314296	missense_variant													missense_variant|MODERATE|DAPPUDRAFT_314296|DAPPUDRAFT_314296|transcript|EFX85164.1|protein_coding|2/16|c.291T>A|p.Phe97Leu|291/3321|291/3198|97/1065||,T|downstream_gene_variant|MODIFIER|DAPPUDRAFT_314297|DAPPUDRAFT_314297|transcript|EFX85163.1|protein_coding||c.*1199T>A|||||945|
152	C027	Metal-free control	Hom-Het	11	727494	GG	GA	Intronic	238238	intron_variant													intron_variant|MODIFIER|DAPPUDRAFT_238238|DAPPUDRAFT_238238|transcript|EFX84834.1|protein_coding|1/8|c.75+159G>A||||||
153	C027	Metal-free control	Hom-Het	27	102798	CC	CT	Intergenic	318948 / 244083	intergenic_region													intergenic_region|MODIFIER|DAPPUDRAFT_318948-DAPPUDRAFT_244083|DAPPUDRAFT_318948-DAPPUDRAFT_244083|intergenic_region|DAPPUDRAFT_318948-DAPPUDRAFT_244083|||n.102799C>T||||||
154	C027	Metal-free control	Hom-Het	32	842057	GG	GA	Intergenic	245437 / 305006	intergenic_region													intergenic_region|MODIFIER|DAPPUDRAFT_245437-DAPPUDRAFT_305006|DAPPUDRAFT_245437-DAPPUDRAFT_305006|intergenic_region|DAPPUDRAFT_245437-DAPPUDRAFT_305006|||n.842058G>A||||||
155	C027	Metal-free control	Hom-Het	34	718378	AA	AT	Intergenic	245969	upstream_gene_variant													upstream_gene_variant|MODIFIER|DAPPUDRAFT_245969|DAPPUDRAFT_245969|transcript|EFX78696.1|protein_coding||c.-518T>A|||||518|,T|downstream_gene_variant|MODIFIER|DAPPUDRAFT_245970|DAPPUDRAFT_245970|transcript|EFX78695.1|protein_coding||c.*820T>A|||||820|,T|intergenic_region|MODIFIER|DAPPUDRAFT_245969-DAPPUDRAFT_245970|DAPPUDRAFT_245969-DAPPUDRAFT_245970|intergenic_region|DAPPUDRAFT_245969-DAPPUDRAFT…
156	C027	Metal-free control	Hom-Het	95	167461	TT	TA	Intergenic	112351	downstream_gene_variant													downstream_gene_variant|MODIFIER|DAPPUDRAFT_112351|DAPPUDRAFT_112351|transcript|EFX70817.1|protein_coding||c.*2150A>T|||||2150|,A|intergenic_region|MODIFIER|DAPPUDRAFT_256623-DAPPUDRAFT_112351|DAPPUDRAFT_256623-DAPPUDRAFT_112351|intergenic_region|DAPPUDRAFT_256623-DAPPUDRAFT_112351|||n.167462T>A||||||
157	C034	Metal-free control	Hom-Het	6	681913	CC	TC	Exonic	192569	missense_variant													missense_variant|MODERATE|DAPPUDRAFT_192569|DAPPUDRAFT_192569|transcript|EFX87392.1|protein_coding|3/4|c.1564G>A|p.Ala522Thr|1591/2900|1564/2814|522/937||,T|downstream_gene_variant|MODIFIER|DAPPUDRAFT_97078|DAPPUDRAFT_97078|transcript|EFX86913.1|protein_coding||c.*1954C>T|||||1954|,T|downstream_gene_variant|MODIFIER|DAPPUDRAFT_312345|DAPPUDRAFT_312345|transcript|EFX87391.1|protein_coding||c.*4262…
158	C034	Metal-free control	Hom-Het	8	1913339	CC	CA	Intergenic	193332	upstream_gene_variant													upstream_gene_variant|MODIFIER|DAPPUDRAFT_193332|DAPPUDRAFT_193332|transcript|EFX86237.1|protein_coding||c.-3751C>A|||||3636|,A|intron_variant|MODIFIER|DAPPUDRAFT_308512|DAPPUDRAFT_308512|transcript|EFX86325.1|protein_coding|1/14|c.133-294G>T||||||
159	C034	Metal-free control	Hom-Het	10	24614	AA	GA	Intergenic	313767	upstream_gene_variant													upstream_gene_variant|MODIFIER|DAPPUDRAFT_313767|DAPPUDRAFT_313767|transcript|EFX85678.1|protein_coding||c.-2053T>C|||||2053|,G|downstream_gene_variant|MODIFIER|DAPPUDRAFT_313769|DAPPUDRAFT_313769|transcript|EFX85677.1|protein_coding||c.*1273T>C|||||1273|,G|intergenic_region|MODIFIER|DAPPUDRAFT_313767-DAPPUDRAFT_313769|DAPPUDRAFT_313767-DAPPUDRAFT_313769|intergenic_region|DAPPUDRAFT_313767-DAPPUD…
160	C034	Metal-free control	Hom-Het	15	513423	GG	AG	Intergenic	48286	upstream_gene_variant													upstream_gene_variant|MODIFIER|DAPPUDRAFT_48286|DAPPUDRAFT_48286|transcript|EFX83500.1|protein_coding||c.-2486C>T|||||2486|,A|intergenic_region|MODIFIER|DAPPUDRAFT_48286-DAPPUDRAFT_240035|DAPPUDRAFT_48286-DAPPUDRAFT_240035|intergenic_region|DAPPUDRAFT_48286-DAPPUDRAFT_240035|||n.513424G>A||||||
161	C034	Metal-free control	Hom-Het	28	595217	AA	AC	Intergenic	304357	upstream_gene_variant													upstream_gene_variant|MODIFIER|DAPPUDRAFT_304357|DAPPUDRAFT_304357|transcript|EFX79876.1|protein_coding||c.-642T>G|||||374|,C|downstream_gene_variant|MODIFIER|DAPPUDRAFT_304358|DAPPUDRAFT_304358|transcript|EFX79875.1|protein_coding||c.*923T>G|||||853|,C|intergenic_region|MODIFIER|DAPPUDRAFT_304357-DAPPUDRAFT_304358|DAPPUDRAFT_304357-DAPPUDRAFT_304358|intergenic_region|DAPPUDRAFT_304357-DAPPUDRAFT…
162	C034	Metal-free control	Hom-Het	35	150941	TT	TC	Intronic	24785	intron_variant													intron_variant|MODIFIER|DAPPUDRAFT_24785|DAPPUDRAFT_24785|transcript|EFX78559.1|protein_coding|2/2|c.274-3993A>G||||||WARNING_TRANSCRIPT_NO_START_CODON
163	C034	Metal-free control	Hom-Het	97	329591	AA	AG	Intronic	309391	3_prime_UTR_variant													3_prime_UTR_variant|MODIFIER|DAPPUDRAFT_309391|DAPPUDRAFT_309391|transcript|EFX70632.1|protein_coding|4/4|c.*91T>C|||||91|,G|upstream_gene_variant|MODIFIER|DAPPUDRAFT_256897|DAPPUDRAFT_256897|transcript|EFX70633.1|protein_coding||c.-2858T>C|||||2858|,G|upstream_gene_variant|MODIFIER|DAPPUDRAFT_61045|DAPPUDRAFT_61045|transcript|EFX70601.1|protein_coding||c.-3349A>G|||||3349|,G|downstream_gene_vari…
164	C034	Metal-free control	Hom-Het	289	10589	AA	AT	Intergenic	266072	upstream_gene_variant													upstream_gene_variant|MODIFIER|DAPPUDRAFT_266072|DAPPUDRAFT_266072|transcript|EFX64625.1|protein_coding||c.-290T>A|||||290|,T|downstream_gene_variant|MODIFIER|DAPPUDRAFT_266073|DAPPUDRAFT_266073|transcript|EFX64624.1|protein_coding||c.*3247T>A|||||3247|,T|intergenic_region|MODIFIER|DAPPUDRAFT_266072-DAPPUDRAFT_266073|DAPPUDRAFT_266072-DAPPUDRAFT_266073|intergenic_region|DAPPUDRAFT_266072-DAPPUDRA…
165	C035	Metal-free control	Hom-Het	2	19333	AA	CA	Exonic	346971	synonymous_variant													synonymous_variant|LOW|DAPPUDRAFT_346971|DAPPUDRAFT_346971|transcript|EFX89859.1|protein_coding|19/35|c.2580T>G|p.Pro860Pro|2711/5431|2580/5160|860/1719||
166	C035	Metal-free control	Hom-Het	2	1376001	GG	GA	Intergenic	310291	downstream_gene_variant													downstream_gene_variant|MODIFIER|DAPPUDRAFT_310291|DAPPUDRAFT_310291|transcript|EFX89310.1|protein_coding||c.*38G>A|||||38|,A|downstream_gene_variant|MODIFIER|DAPPUDRAFT_220449|DAPPUDRAFT_220449|transcript|EFX89711.1|protein_coding||c.*993C>T|||||753|,A|downstream_gene_variant|MODIFIER|DAPPUDRAFT_40590|DAPPUDRAFT_40590|transcript|EFX89710.1|protein_coding||c.*2718C>T|||||2718|,A|intergenic_region…
167	C035	Metal-free control	Hom-Het	4	3025458	TT	TC	Exonic	192054	missense_variant													missense_variant|MODERATE|DAPPUDRAFT_192054|DAPPUDRAFT_192054|transcript|EFX88200.1|protein_coding|6/6|c.937A>G|p.Ile313Val|1253/2397|937/1212|313/403||,C|upstream_gene_variant|MODIFIER|DAPPUDRAFT_221401|DAPPUDRAFT_221401|transcript|EFX88201.1|protein_coding||c.-3967A>G|||||3903|,C|downstream_gene_variant|MODIFIER|DAPPUDRAFT_305738|DAPPUDRAFT_305738|transcript|EFX88199.1|protein_coding||c.*4311A>…
168	C035	Metal-free control	Hom-Het	19	1361039	TT	TC	Intronic	317166	intron_variant													intron_variant|MODIFIER|DAPPUDRAFT_317166|DAPPUDRAFT_317166|transcript|EFX81961.1|protein_coding|4/6|c.617-3721A>G||||||
169	C035	Metal-free control	Hom-Het	48	284366	TT	TA	Intergenic	107227	downstream_gene_variant													downstream_gene_variant|MODIFIER|DAPPUDRAFT_107227|DAPPUDRAFT_107227|transcript|EFX76088.1|protein_coding||c.*2236T>A|||||2236|,A|intergenic_region|MODIFIER|DAPPUDRAFT_107227-DAPPUDRAFT_107229|DAPPUDRAFT_107227-DAPPUDRAFT_107229|intergenic_region|DAPPUDRAFT_107227-DAPPUDRAFT_107229|||n.284367T>A||||||
170	C035	Metal-free control	Hom-Het	53	83832	GG	AG	Exonic	306783	synonymous_variant													synonymous_variant|LOW|DAPPUDRAFT_306783|DAPPUDRAFT_306783|transcript|EFX75371.1|protein_coding|3/8|c.540G>A|p.Arg180Arg|789/2508|540/1557|180/518||,A|downstream_gene_variant|MODIFIER|DAPPUDRAFT_56192|DAPPUDRAFT_56192|transcript|EFX75370.1|protein_coding||c.*880G>A|||||880|WARNING_TRANSCRIPT_NO_START_CODON,A|downstream_gene_variant|MODIFIER|DAPPUDRAFT_306744|DAPPUDRAFT_306744|transcript|EFX75490.…
171	C035	Metal-free control	Hom-Het	53	776441	AA	AG	Intergenic	107963	upstream_gene_variant													upstream_gene_variant|MODIFIER|DAPPUDRAFT_107963|DAPPUDRAFT_107963|transcript|EFX75450.1|protein_coding||c.-4546T>C|||||4546|,G|downstream_gene_variant|MODIFIER|DAPPUDRAFT_107964|DAPPUDRAFT_107964|transcript|EFX75449.1|protein_coding||c.*2823T>C|||||2823|,G|intergenic_region|MODIFIER|DAPPUDRAFT_107963-DAPPUDRAFT_107964|DAPPUDRAFT_107963-DAPPUDRAFT_107964|intergenic_region|DAPPUDRAFT_107963-DAPPUD…
172	C035	Metal-free control	Hom-Het	65	468713	GG	GT	Intergenic	109415	downstream_gene_variant													downstream_gene_variant|MODIFIER|DAPPUDRAFT_109415|DAPPUDRAFT_109415|transcript|EFX73874.1|protein_coding||c.*4G>T|||||4|,T|intergenic_region|MODIFIER|DAPPUDRAFT_109415-DAPPUDRAFT_324874|DAPPUDRAFT_109415-DAPPUDRAFT_324874|intergenic_region|DAPPUDRAFT_109415-DAPPUDRAFT_324874|||n.468714G>T||||||
173	C035	Metal-free control	Hom-Het	80	16734	CC	CT	Intergenic	59365	downstream_gene_variant													downstream_gene_variant|MODIFIER|DAPPUDRAFT_59365|DAPPUDRAFT_59365|transcript|EFX72093.1|protein_coding||c.*2437C>T|||||2437|,T|downstream_gene_variant|MODIFIER|DAPPUDRAFT_326470|DAPPUDRAFT_326470|transcript|EFX72181.1|protein_coding||c.*4290G>A|||||4290|,T|intergenic_region|MODIFIER|DAPPUDRAFT_59365-DAPPUDRAFT_326470|DAPPUDRAFT_59365-DAPPUDRAFT_326470|intergenic_region|DAPPUDRAFT_59365-DAPPUDRAF…
174	C035	Metal-free control	Hom-Het	109	273887	CC	GC	Exonic	328806	missense_variant													missense_variant|MODERATE|DAPPUDRAFT_328806|DAPPUDRAFT_328806|transcript|EFX69754.1|protein_coding|1/2|c.7G>C|p.Ala3Pro|7/192|7/192|3/63||,G|upstream_gene_variant|MODIFIER|DAPPUDRAFT_258138|DAPPUDRAFT_258138|transcript|EFX69756.1|protein_coding||c.-3007G>C|||||3007|,G|upstream_gene_variant|MODIFIER|DAPPUDRAFT_328805|DAPPUDRAFT_328805|transcript|EFX69755.1|protein_coding||c.-363G>C|||||363|
175	C035	Metal-free control	Hom-Het	235	94477	GG	TG	Exonic	333422	missense_variant													missense_variant|MODERATE|DAPPUDRAFT_333422|DAPPUDRAFT_333422|transcript|EFX65212.1|protein_coding|2/4|c.390G>T|p.Met130Ile|390/1239|390/1239|130/412||,T|upstream_gene_variant|MODIFIER|DAPPUDRAFT_265043|DAPPUDRAFT_265043|transcript|EFX65219.1|protein_coding||c.-3280C>A|||||3280|,T|upstream_gene_variant|MODIFIER|DAPPUDRAFT_333421|DAPPUDRAFT_333421|transcript|EFX65218.1|protein_coding||c.-1081C>A||…
176	C035	Metal-free control	Hom-Het	657	7813	GG	GT	Intergenic	119264	downstream_gene_variant													downstream_gene_variant|MODIFIER|DAPPUDRAFT_119264|DAPPUDRAFT_119264|transcript|EFX63379.1|protein_coding||c.*490G>T|||||490|,T|intergenic_region|MODIFIER|DAPPUDRAFT_119264-DAPPUDRAFT_335532|DAPPUDRAFT_119264-DAPPUDRAFT_335532|intergenic_region|DAPPUDRAFT_119264-DAPPUDRAFT_335532|||n.7814G>T||||||
177	C036	Metal-free control	Hom-Het	3	741282	GG	GA	Intergenic	233686	upstream_gene_variant													upstream_gene_variant|MODIFIER|DAPPUDRAFT_233686|DAPPUDRAFT_233686|transcript|EFX88550.1|protein_coding||c.-2065G>A|||||2065|,A|downstream_gene_variant|MODIFIER|U6|EMDPUG00000005222|transcript|EMDPUT00000005222.1|snRNA||n.*2G>A|||||2|,A|intergenic_region|MODIFIER|U6-DAPPUDRAFT_233686|EMDPUG00000005222-DAPPUDRAFT_233686|intergenic_region|EMDPUG00000005222-DAPPUDRAFT_233686|||n.741283G>A||||||
178	C036	Metal-free control	Hom-Het	10	930023	TT	TG	Intergenic	45729	upstream_gene_variant													upstream_gene_variant|MODIFIER|DAPPUDRAFT_45729|DAPPUDRAFT_45729|transcript|EFX85278.1|protein_coding||c.-2306T>G|||||2306|,G|upstream_gene_variant|MODIFIER|DAPPUDRAFT_237790|DAPPUDRAFT_237790|transcript|EFX85279.1|protein_coding||c.-4614T>G|||||4614|,G|downstream_gene_variant|MODIFIER|DAPPUDRAFT_230543|DAPPUDRAFT_230543|transcript|EFX85276.1|protein_coding||c.*2745T>G|||||2083|,G|downstream_gene…
179	C036	Metal-free control	Hom-Het	29	1201562	GG	GA	Intergenic	244827	upstream_gene_variant													upstream_gene_variant|MODIFIER|DAPPUDRAFT_244827|DAPPUDRAFT_244827|transcript|EFX79608.1|protein_coding||c.-80C>T|||||80|,A|downstream_gene_variant|MODIFIER|DAPPUDRAFT_319502|DAPPUDRAFT_319502|transcript|EFX79607.1|protein_coding||c.*903C>T|||||595|,A|downstream_gene_variant|MODIFIER|DAPPUDRAFT_319503|DAPPUDRAFT_319503|transcript|EFX79606.1|protein_coding||c.*2991C>T|||||2991|,A|downstream_gene_v…
180	C036	Metal-free control	Hom-Het	30	347216	GG	AG	Intergenic	52422	downstream_gene_variant													downstream_gene_variant|MODIFIER|DAPPUDRAFT_52422|DAPPUDRAFT_52422|transcript|EFX79297.1|protein_coding||c.*3725G>A|||||3725|,A|downstream_gene_variant|MODIFIER|DAPPUDRAFT_104387|DAPPUDRAFT_104387|transcript|EFX79298.1|protein_coding||c.*1211G>A|||||1211|,A|intron_variant|MODIFIER|DAPPUDRAFT_244900|DAPPUDRAFT_244900|transcript|EFX79457.1|protein_coding|4/4|c.259+797C>T||||||
181	C036	Metal-free control	Hom-Het	31	613492	GG	GA	Exonic	319776	missense_variant													missense_variant|MODERATE|DAPPUDRAFT_319776|DAPPUDRAFT_319776|transcript|EFX79148.1|protein_coding|9/10|c.3004G>A|p.Glu1002Lys|3004/4360|3004/4227|1002/1408||,A|downstream_gene_variant|MODIFIER|DAPPUDRAFT_52632|DAPPUDRAFT_52632|transcript|EFX79147.1|protein_coding||c.*4948G>A|||||4948|
182	C036	Metal-free control	Hom-Het	38	693600	GG	GA	Intergenic	128719	downstream_gene_variant													downstream_gene_variant|MODIFIER|DAPPUDRAFT_128719|DAPPUDRAFT_128719|transcript|EFX77818.1|protein_coding||c.*3128G>A|||||3128|,A|downstream_gene_variant|MODIFIER|DAPPUDRAFT_105763|DAPPUDRAFT_105763|transcript|EFX77869.2|protein_coding||c.*1172C>T|||||1172|,A|downstream_gene_variant|MODIFIER|DAPPUDRAFT_305325|DAPPUDRAFT_305325|transcript|EFX77868.1|protein_coding||c.*4579C>T|||||4312|,A|intergeni…
183	C036	Metal-free control	Hom-Het	68	396217	CC	CT	Intronic	253101	splice_region_variant&intron_variant													splice_region_variant&intron_variant|LOW|DAPPUDRAFT_253101|DAPPUDRAFT_253101|transcript|EFX73490.1|protein_coding|1/4|c.16+5G>A||||||,T|upstream_gene_variant|MODIFIER|DAPPUDRAFT_307696|DAPPUDRAFT_307696|transcript|EFX73491.1|protein_coding||c.-2811G>A|||||2533|,T|upstream_gene_variant|MODIFIER|DAPPUDRAFT_109776|DAPPUDRAFT_109776|transcript|EFX73460.1|protein_coding||c.-4421C>T|||||4421|
184	C036	Metal-free control	Hom-Het	166	172739	CC	TC	Intergenic	203829	upstream_gene_variant													upstream_gene_variant|MODIFIER|DAPPUDRAFT_203829|DAPPUDRAFT_203829|transcript|EFX67010.1|protein_coding||c.-1283G>A|||||1262|,T|downstream_gene_variant|MODIFIER|DAPPUDRAFT_6988|DAPPUDRAFT_6988|transcript|EFX67002.1|protein_coding||c.*501C>T|||||501|WARNING_TRANSCRIPT_NO_START_CODON,T|intergenic_region|MODIFIER|DAPPUDRAFT_6988-DAPPUDRAFT_14273|DAPPUDRAFT_6988-DAPPUDRAFT_14273|intergenic_region|DAP…
185	C037	Metal-free control	Hom-Het	4	264802	TT	CT	Exonic	305574	synonymous_variant													synonymous_variant|LOW|DAPPUDRAFT_305574|DAPPUDRAFT_305574|transcript|EFX88452.1|protein_coding|4/6|c.1347A>G|p.Gly449Gly|1347/2276|1347/2139|449/712||,C|upstream_gene_variant|MODIFIER|DAPPUDRAFT_234331|DAPPUDRAFT_234331|transcript|EFX88453.1|protein_coding||c.-2425A>G|||||2425|,C|downstream_gene_variant|MODIFIER|DAPPUDRAFT_311258|DAPPUDRAFT_311258|transcript|EFX88451.1|protein_coding||c.*3110A>G…
186	C037	Metal-free control	Hom-Het	4	264804	CC	AC	Exonic	305574	stop_gained													stop_gained|HIGH|DAPPUDRAFT_305574|DAPPUDRAFT_305574|transcript|EFX88452.1|protein_coding|4/6|c.1345G>T|p.Gly449*|1345/2276|1345/2139|449/712||,A|upstream_gene_variant|MODIFIER|DAPPUDRAFT_234331|DAPPUDRAFT_234331|transcript|EFX88453.1|protein_coding||c.-2427G>T|||||2427|,A|downstream_gene_variant|MODIFIER|DAPPUDRAFT_311258|DAPPUDRAFT_311258|transcript|EFX88451.1|protein_coding||c.*3108G>T|||||310…
187	C037	Metal-free control	Hom-Het	7	2198145	CC	CA	Intergenic	OTD2	downstream_gene_variant													downstream_gene_variant|MODIFIER|OTD2|DAPPUDRAFT_347231|transcript|EFX86663.2|protein_coding||c.*1949G>T|||||1949|,A|intron_variant|MODIFIER|DAPPUDRAFT_44451|DAPPUDRAFT_44451|transcript|EFX86638.1|protein_coding|10/10|c.2099-378C>A||||||
188	C037	Metal-free control	Hom-Het	13	1362528	CC	CT	Exonic	315189	missense_variant													missense_variant|MODERATE|DAPPUDRAFT_315189|DAPPUDRAFT_315189|transcript|EFX84066.1|protein_coding|2/8|c.80C>G|p.Ala27Gly|80/1044|80/1044|27/347||,G|upstream_gene_variant|MODIFIER|DAPPUDRAFT_239328|DAPPUDRAFT_239328|transcript|EFX84180.1|protein_coding||c.-3397G>C|||||3397|,G|upstream_gene_variant|MODIFIER|DAPPUDRAFT_239330|DAPPUDRAFT_239330|transcript|EFX84067.1|protein_coding||c.-4748C>G|||||47…
189	C037	Metal-free control	Hom-Het	14	365924	GG	GT	Intergenic	301617	upstream_gene_variant													upstream_gene_variant|MODIFIER|DAPPUDRAFT_301617|DAPPUDRAFT_301617|transcript|EFX83585.1|protein_coding||c.-5002G>T|||||3824|,T|downstream_gene_variant|MODIFIER|DAPPUDRAFT_315390|DAPPUDRAFT_315390|transcript|EFX83584.1|protein_coding||c.*3760G>T|||||3760|,T|intergenic_region|MODIFIER|DAPPUDRAFT_315390-DAPPUDRAFT_301617|DAPPUDRAFT_315390-DAPPUDRAFT_301617|intergenic_region|DAPPUDRAFT_315390-DAPPUD…
190	C037	Metal-free control	Hom-Het	15	1261395	CC	CT	Intronic	299726	intron_variant													intron_variant|MODIFIER|DAPPUDRAFT_299726|DAPPUDRAFT_299726|transcript|EFX83356.2|protein_coding|1/3|c.258+6656C>A||||||WARNING_TRANSCRIPT_NO_STOP_CODON
191	C037	Metal-free control	Hom-Het	21	1059608	CC	CA	Exonic	303428	missense_variant													missense_variant|MODERATE|DAPPUDRAFT_303428|DAPPUDRAFT_303428|transcript|EFX81468.1|protein_coding|1/1|c.889G>T|p.Ala297Ser|1114/1397|889/1029|297/342||,A|upstream_gene_variant|MODIFIER|DAPPUDRAFT_211356|DAPPUDRAFT_211356|transcript|EFX81470.1|protein_coding||c.-2717G>T|||||2698|,A|upstream_gene_variant|MODIFIER|DAPPUDRAFT_102493|DAPPUDRAFT_102493|transcript|EFX81469.1|protein_coding||c.-2034G>T|…
192	C037	Metal-free control	Hom-Het	26	105113	GG	GA	Intergenic	103572	upstream_gene_variant													upstream_gene_variant|MODIFIER|DAPPUDRAFT_103572|DAPPUDRAFT_103572|transcript|EFX80118.1|protein_coding||c.-45G>A|||||45|,A|downstream_gene_variant|MODIFIER|DAPPUDRAFT_318704|DAPPUDRAFT_318704|transcript|EFX80117.1|protein_coding||c.*2311G>A|||||2311|,A|downstream_gene_variant|MODIFIER|DAPPUDRAFT_318707|DAPPUDRAFT_318707|transcript|EFX80314.1|protein_coding||c.*824C>T|||||824|,A|downstream_gene_v…
193	C037	Metal-free control	Hom-Het	28	604150	GG	GT	Exonic	188248	missense_variant													missense_variant|MODERATE|DAPPUDRAFT_188248|DAPPUDRAFT_188248|transcript|EFX79772.1|protein_coding|2/9|c.247G>T|p.Gly83Trp|247/1441|247/1272|83/423||,T|upstream_gene_variant|MODIFIER|DAPPUDRAFT_304358|DAPPUDRAFT_304358|transcript|EFX79875.1|protein_coding||c.-1043C>A|||||1043|,T|downstream_gene_variant|MODIFIER|DAPPUDRAFT_304359|DAPPUDRAFT_304359|transcript|EFX79874.1|protein_coding||c.*1685C>A||…
194	C037	Metal-free control	Hom-Het	29	471251	CC	CT	Exonic	244673	missense_variant													missense_variant|MODERATE|DAPPUDRAFT_244673|DAPPUDRAFT_244673|transcript|EFX79692.1|protein_coding|1/3|c.643G>A|p.Gly215Ser|643/1977|643/1977|215/658||,T|upstream_gene_variant|MODIFIER|DAPPUDRAFT_244672|DAPPUDRAFT_244672|transcript|EFX79693.1|protein_coding||c.-4127G>A|||||4127|,T|upstream_gene_variant|MODIFIER|tRNA-Val|EMDPUG00000003253|transcript|EMDPUT00000003253.1|protein_coding||c.-1021C>T||…
195	C037	Metal-free control	Hom-Het	36	833518	CC	CT	Exonic	299555	missense_variant													missense_variant|MODERATE|DAPPUDRAFT_299555|DAPPUDRAFT_299555|transcript|EFX78176.2|protein_coding|5/6|c.902C>T|p.Pro301Leu|902/1240|902/1095|301/364||WARNING_TRANSCRIPT_NO_START_CODON,T|upstream_gene_variant|MODIFIER|DAPPUDRAFT_305250|DAPPUDRAFT_305250|transcript|EFX78266.1|protein_coding||c.-4137G>A|||||4137|,T|upstream_gene_variant|MODIFIER|DAPPUDRAFT_320674|DAPPUDRAFT_320674|transcript|EFX781…
196	C037	Metal-free control	Hom-Het	114	249785	TT	GT	Exonic	30479	missense_variant													missense_variant|MODERATE|DAPPUDRAFT_30479|DAPPUDRAFT_30479|transcript|EFX69484.1|protein_coding|1/2|c.542A>C|p.Lys181Thr|542/1332|542/1332|181/443||WARNING_TRANSCRIPT_NO_START_CODON,G|downstream_gene_variant|MODIFIER|DAPPUDRAFT_258566|DAPPUDRAFT_258566|transcript|EFX69451.1|protein_coding||c.*3467T>G|||||3467|,G|downstream_gene_variant|MODIFIER|DAPPUDRAFT_258568|DAPPUDRAFT_258568|transcript|EFX6…
197	C037	Metal-free control	Hom-Het	149	63606	CC	CT	Intergenic	U6	upstream_gene_variant													upstream_gene_variant|MODIFIER|U6|EMDPUG00000005099|transcript|EMDPUT00000005099.1|snRNA||n.-4853C>T|||||4853|,T|intron_variant|MODIFIER|DAPPUDRAFT_115247|DAPPUDRAFT_115247|transcript|EFX67671.1|protein_coding|2/3|c.236+183G>A||||||
198	C037	Metal-free control	Hom-Het	245	36016	GG	GA	Exonic	SYT16	missense_variant													missense_variant|MODERATE|SYT16|DAPPUDRAFT_442629|transcript|EFX65044.2|protein_coding|2/3|c.574G>A|p.Gly192Ser|574/1269|574/1269|192/422||WARNING_TRANSCRIPT_NO_START_CODON,A|upstream_gene_variant|MODIFIER|DAPPUDRAFT_303977|DAPPUDRAFT_303977|transcript|EFX65057.1|protein_coding||c.-4548C>T|||||4548|,A|upstream_gene_variant|MODIFIER|CCS1|DAPPUDRAFT_265300|transcript|EFX65045.1|protein_coding||c.-1…
199	C038	Metal-free control	Hom-Het	1	2733144	CC	CG	Exonic	299720	missense_variant													missense_variant|MODERATE|DAPPUDRAFT_299720|DAPPUDRAFT_299720|transcript|EFX90264.1|protein_coding|5/10|c.589G>C|p.Val197Leu|589/1509|589/1509|197/502||
200	C038	Metal-free control	Hom-Het	5	489890	GG	AG	Intronic	42745	intron_variant													intron_variant|MODIFIER|DAPPUDRAFT_42745|DAPPUDRAFT_42745|transcript|EFX87494.1|protein_coding|2/8|c.204+1825G>A||||||WARNING_TRANSCRIPT_NO_START_CODON
201	C038	Metal-free control	Hom-Het	8	462881	CC	CA	Intergenic	313132 / 236707	intergenic_region													intergenic_region|MODIFIER|DAPPUDRAFT_313132-DAPPUDRAFT_236707|DAPPUDRAFT_313132-DAPPUDRAFT_236707|intergenic_region|DAPPUDRAFT_313132-DAPPUDRAFT_236707|||n.462882C>A||||||
202	C038	Metal-free control	Hom-Het	26	146745	CC	CT	Intergenic	103579	upstream_gene_variant													upstream_gene_variant|MODIFIER|DAPPUDRAFT_103579|DAPPUDRAFT_103579|transcript|EFX80121.1|protein_coding||c.-4452C>T|||||4452|,T|intergenic_region|MODIFIER|DAPPUDRAFT_103578-DAPPUDRAFT_103579|DAPPUDRAFT_103578-DAPPUDRAFT_103579|intergenic_region|DAPPUDRAFT_103578-DAPPUDRAFT_103579|||n.146746C>T||||||
203	C038	Metal-free control	Hom-Het	39	780544	GG	GA	Intergenic	321195 / 321197	intergenic_region													intergenic_region|MODIFIER|DAPPUDRAFT_321195-DAPPUDRAFT_321197|DAPPUDRAFT_321195-DAPPUDRAFT_321197|intergenic_region|DAPPUDRAFT_321195-DAPPUDRAFT_321197|||n.780545G>A||||||
204	C038	Metal-free control	Hom-Het	49	194648	GG	GA	Intergenic	322708	upstream_gene_variant													upstream_gene_variant|MODIFIER|DAPPUDRAFT_322708|DAPPUDRAFT_322708|transcript|EFX75952.1|protein_coding||c.-1032G>A|||||1032|,A|upstream_gene_variant|MODIFIER|DAPPUDRAFT_322710|DAPPUDRAFT_322710|transcript|EFX75953.1|protein_coding||c.-1483G>A|||||1483|,A|upstream_gene_variant|MODIFIER|DAPPUDRAFT_249502|DAPPUDRAFT_249502|transcript|EFX75954.1|protein_coding||c.-3351G>A|||||3351|,A|upstream_gene_v…
205	C038	Metal-free control	Hom-Het	49	434026	CC	TC	Intergenic	306333	downstream_gene_variant													downstream_gene_variant|MODIFIER|DAPPUDRAFT_306333|DAPPUDRAFT_306333|transcript|EFX76041.1|protein_coding||c.*3863G>A|||||3781|,T|intergenic_region|MODIFIER|DAPPUDRAFT_107368-DAPPUDRAFT_306333|DAPPUDRAFT_107368-DAPPUDRAFT_306333|intergenic_region|DAPPUDRAFT_107368-DAPPUDRAFT_306333|||n.434027C>T||||||
206	C038	Metal-free control	Hom-Het	65	372776	CC	CT	Exonic	57725	missense_variant													missense_variant|MODERATE|DAPPUDRAFT_57725|DAPPUDRAFT_57725|transcript|EFX73932.1|protein_coding|3/6|c.479G>A|p.Gly160Glu|479/1203|479/1203|160/400||,T|upstream_gene_variant|MODIFIER|DAPPUDRAFT_8032|DAPPUDRAFT_8032|transcript|EFX73933.1|protein_coding||c.-3451G>A|||||3451|WARNING_TRANSCRIPT_NO_START_CODON
207	C038	Metal-free control	Hom-Het	66	376790	AA	AG	Intergenic	109514	upstream_gene_variant													upstream_gene_variant|MODIFIER|DAPPUDRAFT_109514|DAPPUDRAFT_109514|transcript|EFX73737.1|protein_coding||c.-4523A>G|||||4523|,G|downstream_gene_variant|MODIFIER|DAPPUDRAFT_324977|DAPPUDRAFT_324977|transcript|EFX73736.1|protein_coding||c.*258A>G|||||74|,G|intergenic_region|MODIFIER|DAPPUDRAFT_324977-DAPPUDRAFT_109514|DAPPUDRAFT_324977-DAPPUDRAFT_109514|intergenic_region|DAPPUDRAFT_324977-DAPPUDRAF…
208	C038	Metal-free control	Hom-Het	107	228439	CC	CA	Intergenic	257942	upstream_gene_variant													upstream_gene_variant|MODIFIER|DAPPUDRAFT_257942|DAPPUDRAFT_257942|transcript|EFX69875.1|protein_coding||c.-3407G>T|||||3407|,A|intergenic_region|MODIFIER|DAPPUDRAFT_257942-DAPPUDRAFT_113260|DAPPUDRAFT_257942-DAPPUDRAFT_113260|intergenic_region|DAPPUDRAFT_257942-DAPPUDRAFT_113260|||n.228440C>A||||||
209	C038	Metal-free control	Hom-Het	355	65004	TT	CT	Intergenic	tRNA-Pseudo	upstream_gene_variant													upstream_gene_variant|MODIFIER|tRNA-Pseudo|EMDPUG00000000904|transcript|EMDPUT00000000904.1|pseudogene||n.-2750A>G|||||2750|,C|upstream_gene_variant|MODIFIER|DAPPUDRAFT_118482|DAPPUDRAFT_118482|transcript|EFX64168.1|protein_coding||c.-93T>C|||||93|,C|intergenic_region|MODIFIER|tRNA-Pseudo-DAPPUDRAFT_118482|EMDPUG00000000904-DAPPUDRAFT_118482|intergenic_region|EMDPUG00000000904-DAPPUDRAFT_118482||…
210	C039	Metal-free control	Hom-Het	2	2111996	AA	AT	Intergenic	220513	upstream_gene_variant													upstream_gene_variant|MODIFIER|DAPPUDRAFT_220513|DAPPUDRAFT_220513|transcript|EFX89633.1|protein_coding||c.-955T>A|||||863|,T|upstream_gene_variant|MODIFIER|DAPPUDRAFT_190714|DAPPUDRAFT_190714|transcript|EFX89362.1|protein_coding||c.-1509A>T|||||1494|,T|downstream_gene_variant|MODIFIER|DAPPUDRAFT_236|DAPPUDRAFT_236|transcript|EFX89361.1|protein_coding||c.*3574A>T|||||3574|WARNING_TRANSCRIPT_NO_ST…
211	C039	Metal-free control	Hom-Het	5	2417828	GG	AG	Intronic	312180	3_prime_UTR_variant													3_prime_UTR_variant|MODIFIER|DAPPUDRAFT_312180|DAPPUDRAFT_312180|transcript|EFX87670.1|protein_coding|4/4|c.*540C>T|||||540|,A|downstream_gene_variant|MODIFIER|DAPPUDRAFT_306579|DAPPUDRAFT_306579|transcript|EFX87643.1|protein_coding||c.*682G>A|||||172|,A|downstream_gene_variant|MODIFIER|DAPPUDRAFT_312181|DAPPUDRAFT_312181|transcript|EFX87669.1|protein_coding||c.*2431C>T|||||2431|
212	C039	Metal-free control	Hom-Het	7	900157	GG	GA	Exonic	312824	synonymous_variant													synonymous_variant|LOW|DAPPUDRAFT_312824|DAPPUDRAFT_312824|transcript|EFX86534.1|protein_coding|2/2|c.171G>A|p.Arg57Arg|171/1413|171/1413|57/470||,A|upstream_gene_variant|MODIFIER|DAPPUDRAFT_236302|DAPPUDRAFT_236302|transcript|EFX86774.1|protein_coding||c.-4203C>T|||||4203|,A|upstream_gene_variant|MODIFIER|DAPPUDRAFT_192850|DAPPUDRAFT_192850|transcript|EFX86535.1|protein_coding||c.-4651G>A|||||46…
213	C039	Metal-free control	Hom-Het	8	1600606	CC	CG	Intergenic	222205	upstream_gene_variant													upstream_gene_variant|MODIFIER|DAPPUDRAFT_222205|DAPPUDRAFT_222205|transcript|EFX86201.1|protein_coding||c.-1077C>G|||||866|,G|downstream_gene_variant|MODIFIER|DAPPUDRAFT_193293|DAPPUDRAFT_193293|transcript|EFX86200.1|protein_coding||c.*2257C>G|||||2257|,G|downstream_gene_variant|MODIFIER|DAPPUDRAFT_236913|DAPPUDRAFT_236913|transcript|EFX86345.1|protein_coding||c.*4503G>C|||||4503|,G|intergenic_r…
214	C039	Metal-free control	Hom-Het	10	897237	AA	AT	Exonic	300387	missense_variant													missense_variant|MODERATE|DAPPUDRAFT_300387|DAPPUDRAFT_300387|transcript|EFX85270.1|protein_coding|6/7|c.1109A>T|p.Asn370Ile|1138/1625|1109/1533|370/510||,T|upstream_gene_variant|MODIFIER|DAPPUDRAFT_300388|DAPPUDRAFT_300388|transcript|EFX85271.1|protein_coding||c.-1956A>T|||||1847|
215	C039	Metal-free control	Hom-Het	13	1716997	CC	TC	Exonic	239397	synonymous_variant													synonymous_variant|LOW|DAPPUDRAFT_239397|DAPPUDRAFT_239397|transcript|EFX84139.1|protein_coding|4/6|c.753G>A|p.Thr251Thr|753/1914|753/1914|251/637||,T|upstream_gene_variant|MODIFIER|DAPPUDRAFT_239395|DAPPUDRAFT_239395|transcript|EFX84141.1|protein_coding||c.-2727G>A|||||2727|,T|upstream_gene_variant|MODIFIER|DAPPUDRAFT_315253|DAPPUDRAFT_315253|transcript|EFX84140.1|protein_coding||c.-1718G>A|||||…
216	C039	Metal-free control	Hom-Het	19	1041496	TT	TA	Intronic	210921	intron_variant													intron_variant|MODIFIER|DAPPUDRAFT_210921|DAPPUDRAFT_210921|transcript|EFX81993.1|protein_coding|4/14|c.720-84A>T||||||
217	C039	Metal-free control	Hom-Het	51	442022	CC	TC	Intergenic	EYELESS	upstream_gene_variant													upstream_gene_variant|MODIFIER|EYELESS|DAPPUDRAFT_249991|transcript|EFX75780.1|protein_coding||c.-594G>A|||||594|,T|intergenic_region|MODIFIER|EYELESS-DAPPUDRAFT_249998|DAPPUDRAFT_249991-DAPPUDRAFT_249998|intergenic_region|DAPPUDRAFT_249991-DAPPUDRAFT_249998|||n.442023C>T||||||
218	C039	Metal-free control	Hom-Het	89	89877	GG	GA	Intergenic	308935	upstream_gene_variant													upstream_gene_variant|MODIFIER|DAPPUDRAFT_308935|DAPPUDRAFT_308935|transcript|EFX71328.1|protein_coding||c.-4829C>T|||||4829|,A|upstream_gene_variant|MODIFIER|DAPPUDRAFT_308920|DAPPUDRAFT_308920|transcript|EFX71327.1|protein_coding||c.-629C>T|||||601|,A|downstream_gene_variant|MODIFIER|DAPPUDRAFT_227990|DAPPUDRAFT_227990|transcript|EFX71274.1|protein_coding||c.*3111G>A|||||2983|,A|downstream_gene…
219	C039	Metal-free control	Hom-Het	111	271179	GG	AG	Intronic	202746	intron_variant													intron_variant|MODIFIER|DAPPUDRAFT_202746|DAPPUDRAFT_202746|transcript|EFX69653.1|protein_coding|1/30|c.206-114C>T||||||
220	C039	Metal-free control	Hom-Het	170	31447	GG	GT	Intergenic	331640	upstream_gene_variant													upstream_gene_variant|MODIFIER|DAPPUDRAFT_331640|DAPPUDRAFT_331640|transcript|EFX66879.1|protein_coding||c.-4397C>A|||||4397|,T|upstream_gene_variant|MODIFIER|DAPPUDRAFT_331641|DAPPUDRAFT_331641|transcript|EFX66842.1|protein_coding||c.-2023G>T|||||2023|,T|downstream_gene_variant|MODIFIER|DAPPUDRAFT_331642|DAPPUDRAFT_331642|transcript|EFX66878.1|protein_coding||c.*2992C>A|||||2992|,T|intergenic_re…
221	C040	Metal-free control	Hom-Het	4	2688513	CC	CA	Intronic	311743	intron_variant													intron_variant|MODIFIER|DAPPUDRAFT_311743|DAPPUDRAFT_311743|transcript|EFX88150.1|protein_coding|5/11|c.873-190C>A||||||
222	C040	Metal-free control	Hom-Het	5	464061	TT	TC	Intergenic	42745	upstream_gene_variant													upstream_gene_variant|MODIFIER|DAPPUDRAFT_42745|DAPPUDRAFT_42745|transcript|EFX87494.1|protein_coding||c.-330T>C|||||330|WARNING_TRANSCRIPT_NO_START_CODON,C|intergenic_region|MODIFIER|DAPPUDRAFT_96564-DAPPUDRAFT_42745|DAPPUDRAFT_96564-DAPPUDRAFT_42745|intergenic_region|DAPPUDRAFT_96564-DAPPUDRAFT_42745|||n.464062T>C||||||
223	C040	Metal-free control	Hom-Het	12	610351	AA	GA	Exonic	46968	synonymous_variant													synonymous_variant|LOW|DAPPUDRAFT_46968|DAPPUDRAFT_46968|transcript|EFX84404.1|protein_coding|4/12|c.1020A>G|p.Pro340Pro|1020/2910|1020/2910|340/969||,G|upstream_gene_variant|MODIFIER|DAPPUDRAFT_314682|DAPPUDRAFT_314682|transcript|EFX84405.1|protein_coding||c.-4183A>G|||||4183|,G|downstream_gene_variant|MODIFIER|DAPPUDRAFT_99499|DAPPUDRAFT_99499|transcript|EFX84403.1|protein_coding||c.*2063A>G|||…
224	C040	Metal-free control	Hom-Het	13	1369951	GG	GA	Intronic	239330	intron_variant													intron_variant|MODIFIER|DAPPUDRAFT_239330|DAPPUDRAFT_239330|transcript|EFX84067.1|protein_coding|7/7|c.947-141G>A||||||
225	C040	Metal-free control	Hom-Het	15	285257	GG	AG	Exonic	347377	missense_variant													missense_variant|MODERATE|DAPPUDRAFT_347377|DAPPUDRAFT_347377|transcript|EFX83517.2|protein_coding|3/12|c.68C>T|p.Thr23Ile|68/2197|68/2049|23/682||,A|upstream_gene_variant|MODIFIER|DAPPUDRAFT_315707|DAPPUDRAFT_315707|transcript|EFX83518.1|protein_coding||c.-3847C>T|||||3768|,A|downstream_gene_variant|MODIFIER|DAPPUDRAFT_347380|DAPPUDRAFT_347380|transcript|EFX83516.2|protein_coding||c.*835C>T|||||…
226	C040	Metal-free control	Hom-Het	46	295556	GG	GA	Exonic	231196	missense_variant													missense_variant|MODERATE|DAPPUDRAFT_231196|DAPPUDRAFT_231196|transcript|EFX76419.1|protein_coding|1/1|c.376G>A|p.Val126Met|702/960|376/597|126/198||,A|upstream_gene_variant|MODIFIER|DAPPUDRAFT_322297|DAPPUDRAFT_322297|transcript|EFX76530.1|protein_coding||c.-4938C>T|||||4938|,A|upstream_gene_variant|MODIFIER|DAPPUDRAFT_3999|DAPPUDRAFT_3999|transcript|EFX76529.1|protein_coding||c.-3897C>T|||||389…
227	C040	Metal-free control	Hom-Het	49	305853	AA	AT	Intronic	322732	3_prime_UTR_variant													3_prime_UTR_variant|MODIFIER|DAPPUDRAFT_322732|DAPPUDRAFT_322732|transcript|EFX75968.1|protein_coding|14/14|c.*141A>T|||||141|,T|upstream_gene_variant|MODIFIER|DAPPUDRAFT_199098|DAPPUDRAFT_199098|transcript|EFX75969.1|protein_coding||c.-1288A>T|||||809|
228	C040	Metal-free control	Hom-Het	54	519149	GG	GT	Exonic	226406	missense_variant													missense_variant|MODERATE|DAPPUDRAFT_226406|DAPPUDRAFT_226406|transcript|EFX75246.1|protein_coding|8/17|c.1550G>T|p.Arg517Leu|2177/4053|1550/3426|517/1141||,T|downstream_gene_variant|MODIFIER|DAPPUDRAFT_323511|DAPPUDRAFT_323511|transcript|EFX75244.1|protein_coding||c.*5055G>T|||||4775|,T|downstream_gene_variant|MODIFIER|DAPPUDRAFT_323512|DAPPUDRAFT_323512|transcript|EFX75245.1|protein_coding||c.*…
229	C040	Metal-free control	Hom-Het	113	134668	AA	GA	Intergenic	228637	upstream_gene_variant													upstream_gene_variant|MODIFIER|DAPPUDRAFT_228637|DAPPUDRAFT_228637|transcript|EFX69519.1|protein_coding||c.-51A>G|||||24|,G|upstream_gene_variant|MODIFIER|DAPPUDRAFT_258443|DAPPUDRAFT_258443|transcript|EFX69520.1|protein_coding||c.-3788A>G|||||3788|,G|downstream_gene_variant|MODIFIER|DAPPUDRAFT_113578|DAPPUDRAFT_113578|transcript|EFX69517.1|protein_coding||c.*4141A>G|||||4141|,G|downstream_gene_v…
230	C043	Metal-free control	Hom-Het	2	1909137	CC	CT	Intronic	233162	intron_variant													intron_variant|MODIFIER|DAPPUDRAFT_233162|DAPPUDRAFT_233162|transcript|EFX89652.1|protein_coding|5/11|c.289-1828G>A||||||
231	C043	Metal-free control	Hom-Het	2	2224692	GG	GA	Exonic	310414	synonymous_variant													synonymous_variant|LOW|DAPPUDRAFT_310414|DAPPUDRAFT_310414|transcript|EFX89622.1|protein_coding|7/9|c.993C>T|p.Cys331Cys|993/1446|993/1302|331/433||,A|upstream_gene_variant|MODIFIER|DAPPUDRAFT_220523|DAPPUDRAFT_220523|transcript|EFX89376.1|protein_coding||c.-2338G>A|||||2338|,A|downstream_gene_variant|MODIFIER|DAPPUDRAFT_233221|DAPPUDRAFT_233221|transcript|EFX89374.1|protein_coding||c.*3877G>A|||…
232	C043	Metal-free control	Hom-Het	20	720778	AA	AT	Exonic	102163	stop_gained													stop_gained|HIGH|DAPPUDRAFT_102163|DAPPUDRAFT_102163|transcript|EFX81792.1|protein_coding|4/8|c.725T>A|p.Leu242*|725/1488|725/1488|242/495||,T|upstream_gene_variant|MODIFIER|DAPPUDRAFT_196039|DAPPUDRAFT_196039|transcript|EFX81794.1|protein_coding||c.-4797T>A|||||4281|,T|upstream_gene_variant|MODIFIER|DAPPUDRAFT_317306|DAPPUDRAFT_317306|transcript|EFX81793.1|protein_coding||c.-1986T>A|||||1842|
233	C043	Metal-free control	Hom-Het	23	874495	TT	TC	Exonic	303760	synonymous_variant													synonymous_variant|LOW|DAPPUDRAFT_303760|DAPPUDRAFT_303760|transcript|EFX80971.1|protein_coding|8/17|c.1320A>G|p.Gly440Gly|1381/5046|1320/4032|440/1343||,C|downstream_gene_variant|MODIFIER|DAPPUDRAFT_303761|DAPPUDRAFT_303761|transcript|EFX80970.1|protein_coding||c.*2626A>G|||||2322|
234	C043	Metal-free control	Hom-Het	44	373771	GG	GA	Intronic	54868	intron_variant													intron_variant|MODIFIER|DAPPUDRAFT_54868|DAPPUDRAFT_54868|transcript|EFX76773.1|protein_coding|2/12|c.163+5402G>A||||||WARNING_TRANSCRIPT_NO_START_CODON
235	C043	Metal-free control	Hom-Het	47	886500	GG	GA	Intergenic	249246	downstream_gene_variant													downstream_gene_variant|MODIFIER|DAPPUDRAFT_249246|DAPPUDRAFT_249246|transcript|EFX76314.1|protein_coding||c.*4373C>T|||||4373|,A|intron_variant|MODIFIER|DAPPUDRAFT_249245|DAPPUDRAFT_249245|transcript|EFX76304.1|protein_coding|1/4|c.14-146G>A||||||
236	C043	Metal-free control	Hom-Het	108	318784	AA	CA	Intergenic	300681	upstream_gene_variant													upstream_gene_variant|MODIFIER|DAPPUDRAFT_300681|DAPPUDRAFT_300681|transcript|EFX69809.1|protein_coding||c.-886T>G|||||649|,C|downstream_gene_variant|MODIFIER|DAPPUDRAFT_7107|DAPPUDRAFT_7107|transcript|EFX69808.1|protein_coding||c.*1947T>G|||||1947|WARNING_TRANSCRIPT_NO_START_CODON,C|downstream_gene_variant|MODIFIER|DAPPUDRAFT_328759|DAPPUDRAFT_328759|transcript|EFX69807.1|protein_coding||c.*2317…
237	C043	Metal-free control	Hom-Het	130	322810	CC	AC	Exonic	329962	missense_variant													missense_variant|MODERATE|DAPPUDRAFT_329962|DAPPUDRAFT_329962|transcript|EFX68599.1|protein_coding|9/19|c.1292G>T|p.Gly431Val|1292/5724|1292/5724|431/1907||
238	C043	Metal-free control	Hom-Het	182	109254	CC	CT	Intergenic	302690	upstream_gene_variant													upstream_gene_variant|MODIFIER|DAPPUDRAFT_302690|DAPPUDRAFT_302690|transcript|EFX66450.1|protein_coding||c.-2198C>T|||||2198|,T|intergenic_region|MODIFIER|WNT5-DAPPUDRAFT_302690|DAPPUDRAFT_64675-DAPPUDRAFT_302690|intergenic_region|DAPPUDRAFT_64675-DAPPUDRAFT_302690|||n.109255C>T||||||
239	C044	Metal-free control	Hom-Het	1	2229649	GG	AG	Intronic	39998	splice_acceptor_variant&intron_variant													splice_acceptor_variant&intron_variant|HIGH|DAPPUDRAFT_39998|DAPPUDRAFT_39998|transcript|EFX90044.1|protein_coding|1/1|c.624-1G>A||||||WARNING_TRANSCRIPT_NO_START_CODON,A|upstream_gene_variant|MODIFIER|DAPPUDRAFT_299882|DAPPUDRAFT_299882|transcript|EFX90319.1|protein_coding||c.-2940C>T|||||2746|,A|downstream_gene_variant|MODIFIER|DAPPUDRAFT_300096|DAPPUDRAFT_300096|transcript|EFX90318.1|protein_c…
240	C044	Metal-free control	Hom-Het	1	3454480	CC	AC	Intergenic	232652 / 94461	intergenic_region													intergenic_region|MODIFIER|DAPPUDRAFT_232652-DAPPUDRAFT_94461|DAPPUDRAFT_232652-DAPPUDRAFT_94461|intergenic_region|DAPPUDRAFT_232652-DAPPUDRAFT_94461|||n.3454481C>A||||||
241	C044	Metal-free control	Hom-Het	6	1980189	CC	CT	Exonic	187429	missense_variant													missense_variant|MODERATE|DAPPUDRAFT_187429|DAPPUDRAFT_187429|transcript|EFX87219.1|protein_coding|1/7|c.142G>A|p.Val48Ile|379/2575|142/1260|48/419||,T|downstream_gene_variant|MODIFIER|DAPPUDRAFT_221828|DAPPUDRAFT_221828|transcript|EFX87101.1|protein_coding||c.*2976C>T|||||2570|
242	C044	Metal-free control	Hom-Het	8	1254722	GG	GA	Exonic	313219	missense_variant													missense_variant|MODERATE|DAPPUDRAFT_313219|DAPPUDRAFT_313219|transcript|EFX86378.1|protein_coding|22/36|c.8332C>T|p.Pro2778Ser|8332/13447|8332/13122|2778/4373||
243	C044	Metal-free control	Hom-Het	12	605118	CC	CA	Exonic	99499	missense_variant													missense_variant|MODERATE|DAPPUDRAFT_99499|DAPPUDRAFT_99499|transcript|EFX84403.1|protein_coding|6/11|c.997C>A|p.Leu333Ile|997/3817|997/3817|333/1271||WARNING_TRANSCRIPT_INCOMPLETE,A|upstream_gene_variant|MODIFIER|DAPPUDRAFT_46968|DAPPUDRAFT_46968|transcript|EFX84404.1|protein_coding||c.-3275C>A|||||3275|
244	C044	Metal-free control	Hom-Het	42	917965	GG	GA	Exonic	TRY5E	stop_gained													stop_gained|HIGH|TRY5E|DAPPUDRAFT_347773|transcript|EFX77157.1|protein_coding|2/7|c.274C>T|p.Arg92*|346/1078|274/879|92/292||,A|stop_gained|HIGH|TRY5E|DAPPUDRAFT_347773|transcript|EFX77158.1|protein_coding|2/6|c.274C>T|p.Arg92*|274/723|274/723|92/240||,A|upstream_gene_variant|MODIFIER|TRY5C|DAPPUDRAFT_347774|transcript|EFX77160.2|protein_coding||c.-3942C>T|||||3864|,A|upstream_gene_variant|MODIFI…
245	C044	Metal-free control	Hom-Het	43	607333	CC	CA	Intergenic	321858	upstream_gene_variant													upstream_gene_variant|MODIFIER|DAPPUDRAFT_321858|DAPPUDRAFT_321858|transcript|EFX76974.1|protein_coding||c.-3369C>A|||||3369|,A|downstream_gene_variant|MODIFIER|DAPPUDRAFT_306022|DAPPUDRAFT_306022|transcript|EFX76973.1|protein_coding||c.*1208C>A|||||936|,A|intergenic_region|MODIFIER|DAPPUDRAFT_306022-DAPPUDRAFT_321858|DAPPUDRAFT_306022-DAPPUDRAFT_321858|intergenic_region|DAPPUDRAFT_306022-DAPPUDR…
246	C044	Metal-free control	Hom-Het	198	148678	GG	GT	Intergenic	302941 / 65065	intergenic_region													intergenic_region|MODIFIER|DAPPUDRAFT_302941-DAPPUDRAFT_65065|DAPPUDRAFT_302941-DAPPUDRAFT_65065|intergenic_region|DAPPUDRAFT_302941-DAPPUDRAFT_65065|||n.148679G>T||||||
247	C044	Metal-free control	Hom-Het	220	63716	TT	CT	Intergenic	303613	upstream_gene_variant													upstream_gene_variant|MODIFIER|DAPPUDRAFT_303613|DAPPUDRAFT_303613|transcript|EFX65530.1|protein_coding||c.-2428A>G|||||2290|,C|upstream_gene_variant|MODIFIER|DAPPUDRAFT_65439|DAPPUDRAFT_65439|transcript|EFX65529.1|protein_coding||c.-1761A>G|||||1761|WARNING_TRANSCRIPT_NO_START_CODON,C|upstream_gene_variant|MODIFIER|DAPPUDRAFT_264572|DAPPUDRAFT_264572|transcript|EFX65512.1|protein_coding||c.-1468…
248	C049	Metal-free control	Hom-Het	9	639774	GG	GT	Intergenic	22045	upstream_gene_variant													upstream_gene_variant|MODIFIER|DAPPUDRAFT_22045|DAPPUDRAFT_22045|transcript|EFX85745.1|protein_coding||c.-204G>T|||||204|WARNING_TRANSCRIPT_NO_STOP_CODON,T|intergenic_region|MODIFIER|DOP-R-DAPPUDRAFT_22045|DAPPUDRAFT_45558-DAPPUDRAFT_22045|intergenic_region|DAPPUDRAFT_45558-DAPPUDRAFT_22045|||n.639775G>T||||||
249	C049	Metal-free control	Hom-Het	9	1060091	AA	AC	Intergenic	98402 / 45266	intergenic_region													intergenic_region|MODIFIER|DAPPUDRAFT_98402-DAPPUDRAFT_45366|DAPPUDRAFT_98402-DAPPUDRAFT_45366|intergenic_region|DAPPUDRAFT_98402-DAPPUDRAFT_45366|||n.1060092A>C||||||
250	C049	Metal-free control	Hom-Het	10	143802	CC	TC	Intergenic	98614	upstream_gene_variant													upstream_gene_variant|MODIFIER|DAPPUDRAFT_98614|DAPPUDRAFT_98614|transcript|EFX85667.1|protein_coding||c.-2739G>A|||||2739|,T|intron_variant|MODIFIER|DAPPUDRAFT_300205|DAPPUDRAFT_300205|transcript|EFX85173.1|protein_coding|1/1|c.45+34C>T||||||
251	C049	Metal-free control	Hom-Het	28	244972	GG	GA	Intergenic	304337	upstream_gene_variant													upstream_gene_variant|MODIFIER|DAPPUDRAFT_304337|DAPPUDRAFT_304337|transcript|EFX79740.1|protein_coding||c.-4677G>A|||||4677|,A|downstream_gene_variant|MODIFIER|DAPPUDRAFT_51873|DAPPUDRAFT_51873|transcript|EFX79739.1|protein_coding||c.*1942G>A|||||1942|WARNING_TRANSCRIPT_NO_START_CODON,A|downstream_gene_variant|MODIFIER|DAPPUDRAFT_304336|DAPPUDRAFT_304336|transcript|EFX79908.1|protein_coding||c.*…
252	C049	Metal-free control	Hom-Het	32	727693	GG	GC	Intergenic	104786	downstream_gene_variant													downstream_gene_variant|MODIFIER|DAPPUDRAFT_104786|DAPPUDRAFT_104786|transcript|EFX79050.1|protein_coding||c.*1085C>G|||||1085|,C|intergenic_region|MODIFIER|DAPPUDRAFT_52830-DAPPUDRAFT_104786|DAPPUDRAFT_52830-DAPPUDRAFT_104786|intergenic_region|DAPPUDRAFT_52830-DAPPUDRAFT_104786|||n.727694G>C||||||
253	C049	Metal-free control	Hom-Het	35	105873	AA	GA	Intergenic	105145	upstream_gene_variant													upstream_gene_variant|MODIFIER|DAPPUDRAFT_105145|DAPPUDRAFT_105145|transcript|EFX78409.1|protein_coding||c.-2501A>G|||||2501|,G|downstream_gene_variant|MODIFIER|DAPPUDRAFT_105144|DAPPUDRAFT_105144|transcript|EFX78408.1|protein_coding||c.*3086A>G|||||3086|,G|intergenic_region|MODIFIER|DAPPUDRAFT_105144-DAPPUDRAFT_105145|DAPPUDRAFT_105144-DAPPUDRAFT_105145|intergenic_region|DAPPUDRAFT_105144-DAPPUD…
254	C049	Metal-free control	Hom-Het	42	158410	GG	GC	Intergenic	SP8	intergenic_region													intergenic_region|MODIFIER|SP8-DAPPUDRAFT_106304|DAPPUDRAFT_106303-DAPPUDRAFT_106304|intergenic_region|DAPPUDRAFT_106303-DAPPUDRAFT_106304|||n.158411G>C||||||
255	C049	Metal-free control	Hom-Het	66	426118	GG	GA	Intergenic	324979 / 324981	intergenic_region													intergenic_region|MODIFIER|DAPPUDRAFT_324979-DAPPUDRAFT_324981|DAPPUDRAFT_324979-DAPPUDRAFT_324981|intergenic_region|DAPPUDRAFT_324979-DAPPUDRAFT_324981|||n.426119G>A||||||
256	C049	Metal-free control	Hom-Het	91	275921	CC	GC	Intronic	216956	5_prime_UTR_variant													5_prime_UTR_variant|MODIFIER|DAPPUDRAFT_216956|DAPPUDRAFT_216956|transcript|EFX71148.1|protein_coding|1/1|c.-35G>C|||||35|,G|upstream_gene_variant|MODIFIER|DAPPUDRAFT_327489|DAPPUDRAFT_327489|transcript|EFX71149.1|protein_coding||c.-3235G>C|||||3232|,G|upstream_gene_variant|MODIFIER|DAPPUDRAFT_60674|DAPPUDRAFT_60674|transcript|EFX71103.1|protein_coding||c.-2479C>G|||||2479|,G|downstream_gene_vari…
257	C049	Metal-free control	Hom-Het	187	164767	GG	AG	Intergenic	229458	upstream_gene_variant													upstream_gene_variant|MODIFIER|DAPPUDRAFT_229458|DAPPUDRAFT_229458|transcript|EFX66308.1|protein_coding||c.-4803C>T|||||4771|,A|upstream_gene_variant|MODIFIER|DAPPUDRAFT_302756|DAPPUDRAFT_302756|transcript|EFX66307.1|protein_coding||c.-2111C>T|||||2111|,A|downstream_gene_variant|MODIFIER|DAPPUDRAFT_332332|DAPPUDRAFT_332332|transcript|EFX66305.1|protein_coding||c.*4592C>T|||||4450|,A|intron_varian…
258	C049	Metal-free control	Hom-Het	193	31967	CC	TC	Intergenic	263601	upstream_gene_variant													upstream_gene_variant|MODIFIER|DAPPUDRAFT_263601|DAPPUDRAFT_263601|transcript|EFX66154.1|protein_coding||c.-168G>A|||||168|,T|upstream_gene_variant|MODIFIER|DAPPUDRAFT_116667|DAPPUDRAFT_116667|transcript|EFX66127.1|protein_coding||c.-1465C>T|||||1465|,T|intergenic_region|MODIFIER|DAPPUDRAFT_263601-DAPPUDRAFT_116667|DAPPUDRAFT_263601-DAPPUDRAFT_116667|intergenic_region|DAPPUDRAFT_263601-DAPPUDRAFT…
259	C049	Metal-free control	Hom-Het	355	85173	AA	AG	Intergenic	266910	intergenic_region													intergenic_region|MODIFIER|DAPPUDRAFT_266910-CHR_END|DAPPUDRAFT_266910-CHR_END|intergenic_region|DAPPUDRAFT_266910-CHR_END|||n.85174A>G||||||
260	C049	Metal-free control	Hom-Het	11645	850	AA	AC	Intergenic	-	intergenic_region													intergenic_region|MODIFIER|||||||||||||
261	C151	Nickel	Hom-Het	3	639015	AA	AT	Intergenic	233667	upstream_gene_variant													upstream_gene_variant|MODIFIER|DAPPUDRAFT_233667|DAPPUDRAFT_233667|transcript|EFX89121.1|protein_coding||c.-753T>A|||||753|,T|upstream_gene_variant|MODIFIER|DAPPUDRAFT_191008|DAPPUDRAFT_191008|transcript|EFX88538.1|protein_coding||c.-892A>T|||||883|,T|downstream_gene_variant|MODIFIER|DAPPUDRAFT_41049|DAPPUDRAFT_41049|transcript|EFX89120.1|protein_coding||c.*3270T>A|||||3270|WARNING_TRANSCRIPT_NO_…
262	C151	Nickel	Hom-Het	3	2211402	CC	CT	Intergenic	27458	upstream_gene_variant													upstream_gene_variant|MODIFIER|DAPPUDRAFT_27458|DAPPUDRAFT_27458|transcript|EFX88679.1|protein_coding||c.-2675C>T|||||2675|WARNING_TRANSCRIPT_NO_STOP_CODON,T|downstream_gene_variant|MODIFIER|DAPPUDRAFT_41025|DAPPUDRAFT_41025|transcript|EFX88678.1|protein_coding||c.*2707C>T|||||2707|,T|intergenic_region|MODIFIER|DAPPUDRAFT_41025-DAPPUDRAFT_27458|DAPPUDRAFT_41025-DAPPUDRAFT_27458|intergenic_region|…
263	C151	Nickel	Hom-Het	9	563866	AA	TA	Intergenic	313492	downstream_gene_variant													downstream_gene_variant|MODIFIER|DAPPUDRAFT_313492|DAPPUDRAFT_313492|transcript|EFX86024.1|protein_coding||c.*522T>A|||||464|,T|intron_variant|MODIFIER|DAPPUDRAFT_45425|DAPPUDRAFT_45425|transcript|EFX85739.1|protein_coding|3/3|c.502-9A>T||||||WARNING_TRANSCRIPT_NO_START_CODON
264	C151	Nickel	Hom-Het	11	1860395	AA	AC	Intergenic	238478	downstream_gene_variant													downstream_gene_variant|MODIFIER|DAPPUDRAFT_238478|DAPPUDRAFT_238478|transcript|EFX84942.1|protein_coding||c.*4000A>C|||||4000|,C|downstream_gene_variant|MODIFIER|DAPPUDRAFT_238480|DAPPUDRAFT_238480|transcript|EFX84985.1|protein_coding||c.*1773T>G|||||1773|,C|intron_variant|MODIFIER|DAPPUDRAFT_46610|DAPPUDRAFT_46610|transcript|EFX84986.1|protein_coding|2/3|c.435+580T>G||||||
265	C151	Nickel	Hom-Het	12	438942	GG	GA	Exonic	187743	missense_variant													missense_variant|MODERATE|DAPPUDRAFT_187743|DAPPUDRAFT_187743|transcript|EFX84366.1|protein_coding|4/11|c.398G>A|p.Arg133Gln|586/2126|398/1938|133/645||,A|upstream_gene_variant|MODIFIER|DAPPUDRAFT_238631|DAPPUDRAFT_238631|transcript|EFX84728.1|protein_coding||c.-2581C>T|||||2581|,A|upstream_gene_variant|MODIFIER|DAPPUDRAFT_25421|DAPPUDRAFT_25421|transcript|EFX84367.1|protein_coding||c.-3019G>A|||…
266	C151	Nickel	Hom-Het	33	538402	AA	AT	Intronic	104913	splice_region_variant&intron_variant													splice_region_variant&intron_variant|LOW|DAPPUDRAFT_104913|DAPPUDRAFT_104913|transcript|EFX78903.1|protein_coding|3/3|c.1352+4T>A||||||,T|downstream_gene_variant|MODIFIER|DAPPUDRAFT_104914|DAPPUDRAFT_104914|transcript|EFX78902.1|protein_coding||c.*2785T>A|||||2785|
267	C151	Nickel	Hom-Het	36	1137474	CC	CT	Intergenic	105524	upstream_gene_variant													upstream_gene_variant|MODIFIER|DAPPUDRAFT_105524|DAPPUDRAFT_105524|transcript|EFX78224.1|protein_coding||c.-2873G>A|||||2873|,T|upstream_gene_variant|MODIFIER|DAPPUDRAFT_320749|DAPPUDRAFT_320749|transcript|EFX78216.1|protein_coding||c.-3980C>T|||||3980|,T|intergenic_region|MODIFIER|DAPPUDRAFT_105524-DAPPUDRAFT_320749|DAPPUDRAFT_105524-DAPPUDRAFT_320749|intergenic_region|DAPPUDRAFT_105524-DAPPUDRA…
268	C151	Nickel	Hom-Het	42	484348	AA	AG	Intergenic	321682 / 248054	intergenic_region													intergenic_region|MODIFIER|DAPPUDRAFT_321682-DAPPUDRAFT_248054|DAPPUDRAFT_321682-DAPPUDRAFT_248054|intergenic_region|DAPPUDRAFT_321682-DAPPUDRAFT_248054|||n.484349A>G||||||
269	C151	Nickel	Hom-Het	45	137603	AA	AT	Exonic	106797	missense_variant													missense_variant|MODERATE|DAPPUDRAFT_106797|DAPPUDRAFT_106797|transcript|EFX76706.1|protein_coding|1/4|c.175T>A|p.Phe59Ile|175/990|175/990|59/329||,T|upstream_gene_variant|MODIFIER|DAPPUDRAFT_322111|DAPPUDRAFT_322111|transcript|EFX76707.1|protein_coding||c.-2090T>A|||||2090|
270	C151	Nickel	Hom-Het	53	159762	AA	AG	Intergenic	250380	downstream_gene_variant													downstream_gene_variant|MODIFIER|DAPPUDRAFT_250380|DAPPUDRAFT_250380|transcript|EFX75376.1|protein_coding||c.*1005A>G|||||1005|,G|intergenic_region|MODIFIER|DAPPUDRAFT_250380-DAPPUDRAFT_323287|DAPPUDRAFT_250380-DAPPUDRAFT_323287|intergenic_region|DAPPUDRAFT_250380-DAPPUDRAFT_323287|||n.159763A>G||||||
271	C151	Nickel	Hom-Het	63	430474	CC	CT	Intergenic	109204	upstream_gene_variant													upstream_gene_variant|MODIFIER|DAPPUDRAFT_109204|DAPPUDRAFT_109204|transcript|EFX74133.1|protein_coding||c.-994C>T|||||994|,T|upstream_gene_variant|MODIFIER|GRO1|DAPPUDRAFT_299754|transcript|EFX74134.1|protein_coding||c.-2494C>T|||||2494|,T|downstream_gene_variant|MODIFIER|DAPPUDRAFT_200252|DAPPUDRAFT_200252|transcript|EFX74132.1|protein_coding||c.*4745C>T|||||3963|,T|intron_variant|MODIFIER|FEM1…
272	C151	Nickel	Hom-Het	68	512347	CC	CT	Exonic	307700	synonymous_variant													synonymous_variant|LOW|DAPPUDRAFT_307700|DAPPUDRAFT_307700|transcript|EFX73484.1|protein_coding|4/18|c.510G>A|p.Arg170Arg|536/2699|510/2673|170/890||
273	C151	Nickel	Hom-Het	69	51118	GG	GA	Intergenic	253168	downstream_gene_variant													downstream_gene_variant|MODIFIER|DAPPUDRAFT_253168|DAPPUDRAFT_253168|transcript|EFX73344.1|protein_coding||c.*3629G>A|||||3629|,A|downstream_gene_variant|MODIFIER|DAPPUDRAFT_109812|DAPPUDRAFT_109812|transcript|EFX73433.1|protein_coding||c.*4757C>T|||||4757|,A|intergenic_region|MODIFIER|DAPPUDRAFT_253168-DAPPUDRAFT_109812|DAPPUDRAFT_253168-DAPPUDRAFT_109812|intergenic_region|DAPPUDRAFT_253168-DAPP…
274	C151	Nickel	Hom-Het	76	209541	CC	TC	Exonic	308173	missense_variant													missense_variant|MODERATE|DAPPUDRAFT_308173|DAPPUDRAFT_308173|transcript|EFX72597.1|protein_coding|7/9|c.869G>A|p.Arg290His|1001/1889|869/1434|290/477||,T|upstream_gene_variant|MODIFIER|DAPPUDRAFT_308204|DAPPUDRAFT_308204|transcript|EFX72550.1|protein_coding||c.-1707C>T|||||1577|,T|downstream_gene_variant|MODIFIER|DAPPUDRAFT_308174|DAPPUDRAFT_308174|transcript|EFX72596.1|protein_coding||c.*3405G>…
275	C151	Nickel	Hom-Het	76	442973	AA	AC	Intergenic	326119	downstream_gene_variant													downstream_gene_variant|MODIFIER|DAPPUDRAFT_326119|DAPPUDRAFT_326119|transcript|EFX72561.1|protein_coding||c.*4863A>C|||||4863|,C|intron_variant|MODIFIER|DAPPUDRAFT_58854|DAPPUDRAFT_58854|transcript|EFX72584.1|protein_coding|2/8|c.189+24T>G||||||
276	C151	Nickel	Hom-Het	79	75524	GG	GA	Exonic	227571	synonymous_variant													synonymous_variant|LOW|DAPPUDRAFT_227571|DAPPUDRAFT_227571|transcript|EFX72310.1|protein_coding|19/23|c.5457C>T|p.Ser1819Ser|5457/6780|5457/6726|1819/2241||,A|upstream_gene_variant|MODIFIER|DAPPUDRAFT_227569|DAPPUDRAFT_227569|transcript|EFX72311.1|protein_coding||c.-4208C>T|||||4208|,A|downstream_gene_variant|MODIFIER|DAPPUDRAFT_326363|DAPPUDRAFT_326363|transcript|EFX72193.1|protein_coding||c.*16…
277	C151	Nickel	Hom-Het	86	367766	CC	CT	Exonic	327021	synonymous_variant													synonymous_variant|LOW|DAPPUDRAFT_327021|DAPPUDRAFT_327021|transcript|EFX71618.1|protein_coding|4/4|c.4110C>T|p.His1370His|4110/4920|4110/4920|1370/1639||,T|upstream_gene_variant|MODIFIER|DAPPUDRAFT_327022|DAPPUDRAFT_327022|transcript|EFX71619.1|protein_coding||c.-1935C>T|||||1935|,T|upstream_gene_variant|MODIFIER|DAPPUDRAFT_111544|DAPPUDRAFT_111544|transcript|EFX71620.1|protein_coding||c.-4497C>…
278	C151	Nickel	Hom-Het	86	367769	GG	GT	Exonic	327021	synonymous_variant													synonymous_variant|LOW|DAPPUDRAFT_327021|DAPPUDRAFT_327021|transcript|EFX71618.1|protein_coding|4/4|c.4113G>T|p.Arg1371Arg|4113/4920|4113/4920|1371/1639||,T|upstream_gene_variant|MODIFIER|DAPPUDRAFT_327022|DAPPUDRAFT_327022|transcript|EFX71619.1|protein_coding||c.-1932G>T|||||1932|,T|upstream_gene_variant|MODIFIER|DAPPUDRAFT_111544|DAPPUDRAFT_111544|transcript|EFX71620.1|protein_coding||c.-4494G>…
279	C151	Nickel	Hom-Het	86	367779	CC	CG	Exonic	327021	missense_variant													missense_variant|MODERATE|DAPPUDRAFT_327021|DAPPUDRAFT_327021|transcript|EFX71618.1|protein_coding|4/4|c.4123C>G|p.Gln1375Glu|4123/4920|4123/4920|1375/1639||,G|upstream_gene_variant|MODIFIER|DAPPUDRAFT_327022|DAPPUDRAFT_327022|transcript|EFX71619.1|protein_coding||c.-1922C>G|||||1922|,G|upstream_gene_variant|MODIFIER|DAPPUDRAFT_111544|DAPPUDRAFT_111544|transcript|EFX71620.1|protein_coding||c.-448…
280	C151	Nickel	Hom-Het	97	220735	TT	TG	Intergenic	GNG1	intergenic_region													intergenic_region|MODIFIER|GNG1-DAPPUDRAFT_309380|DAPPUDRAFT_217190-DAPPUDRAFT_309380|intergenic_region|DAPPUDRAFT_217190-DAPPUDRAFT_309380|||n.220736T>G||||||
281	C151	Nickel	Hom-Het	97	451676	GG	GA	Intergenic	256930	upstream_gene_variant													upstream_gene_variant|MODIFIER|DAPPUDRAFT_256930|DAPPUDRAFT_256930|transcript|EFX70614.1|protein_coding||c.-3965C>T|||||3965|,A|intergenic_region|MODIFIER|DAPPUDRAFT_256930-DAPPUDRAFT_309400|DAPPUDRAFT_256930-DAPPUDRAFT_309400|intergenic_region|DAPPUDRAFT_256930-DAPPUDRAFT_309400|||n.451677G>A||||||
282	C151	Nickel	Hom-Het	153	154957	GG	GT	Intergenic	261496	upstream_gene_variant													upstream_gene_variant|MODIFIER|DAPPUDRAFT_261496|DAPPUDRAFT_261496|transcript|EFX67541.1|protein_coding||c.-3905G>T|||||3905|,T|downstream_gene_variant|MODIFIER|DAPPUDRAFT_261494|DAPPUDRAFT_261494|transcript|EFX67540.1|protein_coding||c.*317G>T|||||317|,T|downstream_gene_variant|MODIFIER|tRNA-Pseudo|EMDPUG00000000176|transcript|EMDPUT00000000176.1|pseudogene||n.*710C>A|||||710|,T|intergenic_regio…
283	C151	Nickel	Hom-Het	160	125680	AA	GA	Intergenic	261890 / 331237	intergenic_region													intergenic_region|MODIFIER|DAPPUDRAFT_261890-DAPPUDRAFT_331237|DAPPUDRAFT_261890-DAPPUDRAFT_331237|intergenic_region|DAPPUDRAFT_261890-DAPPUDRAFT_331237|||n.125681A>G||||||
284	C151	Nickel	Hom-Het	226	48795	TT	CT	Intergenic	65516	downstream_gene_variant													downstream_gene_variant|MODIFIER|DAPPUDRAFT_65516|DAPPUDRAFT_65516|transcript|EFX65383.1|protein_coding||c.*738A>G|||||738|WARNING_TRANSCRIPT_NO_START_CODON,C|intergenic_region|MODIFIER|DAPPUDRAFT_264753-DAPPUDRAFT_65516|DAPPUDRAFT_264753-DAPPUDRAFT_65516|intergenic_region|DAPPUDRAFT_264753-DAPPUDRAFT_65516|||n.48796T>C||||||
285	C151	Nickel	Hom-Het	228	37681	TT	TC	Intergenic	303646	downstream_gene_variant													downstream_gene_variant|MODIFIER|DAPPUDRAFT_303646|DAPPUDRAFT_303646|transcript|EFX65345.1|protein_coding||c.*4479T>C|||||4363|,C|downstream_gene_variant|MODIFIER|DAPPUDRAFT_117344|DAPPUDRAFT_117344|transcript|EFX65346.1|protein_coding||c.*2066T>C|||||2066|,C|downstream_gene_variant|MODIFIER|DAPPUDRAFT_333266|DAPPUDRAFT_333266|transcript|EFX65347.1|protein_coding||c.*232T>C|||||154|,C|intergenic_…
286	C151	Nickel	Hom-Het	5234	3158	GG	AG	Intergenic	-	intergenic_region													intergenic_region|MODIFIER|||||||||||||
287	C155	Nickel	Hom-Het	1	550987	GG	GA	Exonic	309535	stop_gained													stop_gained|HIGH|DAPPUDRAFT_309535|DAPPUDRAFT_309535|transcript|EFX90428.1|protein_coding|11/16|c.1933C>T|p.Gln645*|1933/3038|1933/2634|645/877||,A|downstream_gene_variant|MODIFIER|DAPPUDRAFT_309534|DAPPUDRAFT_309534|transcript|EFX89899.1|protein_coding||c.*3039G>A|||||2503|
288	C155	Nickel	Hom-Het	1	3856862	GG	GA	Exonic	299680	missense_variant													missense_variant|MODERATE|DAPPUDRAFT_299680|DAPPUDRAFT_299680|transcript|EFX90159.2|protein_coding|7/9|c.1366G>A|p.Ala456Thr|1366/1989|1366/1989|456/662||,A|upstream_gene_variant|MODIFIER|DAPPUDRAFT_299961|DAPPUDRAFT_299961|transcript|EFX90206.1|protein_coding||c.-2530C>T|||||2381|,A|downstream_gene_variant|MODIFIER|DAPPUDRAFT_300170|DAPPUDRAFT_300170|transcript|EFX90205.1|protein_coding||c.*1414…
289	C155	Nickel	Hom-Het	19	840272	GG	GA	Exonic	317092	missense_variant													missense_variant|MODERATE|DAPPUDRAFT_317092|DAPPUDRAFT_317092|transcript|EFX82008.1|protein_coding|8/21|c.1016C>T|p.Ser339Phe|1501/3230|1016/2745|339/914||,A|upstream_gene_variant|MODIFIER|DAPPUDRAFT_241712|DAPPUDRAFT_241712|transcript|EFX81909.1|protein_coding||c.-2521G>A|||||2521|
290	C155	Nickel	Hom-Het	30	288457	GG	GT	Intergenic	304821 / 244898	intergenic_region													intergenic_region|MODIFIER|DAPPUDRAFT_304821-DAPPUDRAFT_244898|DAPPUDRAFT_304821-DAPPUDRAFT_244898|intergenic_region|DAPPUDRAFT_304821-DAPPUDRAFT_244898|||n.288458G>T||||||
291	C155	Nickel	Hom-Het	40	771674	GG	GA	Intergenic	305807	upstream_gene_variant													upstream_gene_variant|MODIFIER|DAPPUDRAFT_305807|DAPPUDRAFT_305807|transcript|EFX77531.1|protein_coding||c.-2592C>A|||||2592|,T|upstream_gene_variant|MODIFIER|DAPPUDRAFT_321392|DAPPUDRAFT_321392|transcript|EFX77530.1|protein_coding||c.-399C>A|||||399|,T|upstream_gene_variant|MODIFIER|tRNA-Arg|EMDPUG00000003634|transcript|EMDPUT00000003634.1|protein_coding||c.-86G>T|||||86|WARNING_TRANSCRIPT_NO_ST…
292	C155	Nickel	Hom-Het	43	642438	TT	TC	Intergenic	248298	downstream_gene_variant													downstream_gene_variant|MODIFIER|DAPPUDRAFT_248298|DAPPUDRAFT_248298|transcript|EFX77038.1|protein_coding||c.*3142A>G|||||3142|,C|intron_variant|MODIFIER|DAPPUDRAFT_54823|DAPPUDRAFT_54823|transcript|EFX77039.1|protein_coding|1/10|c.131+1415A>G||||||
293	C155	Nickel	Hom-Het	46	211335	CC	CA	Exonic	306162	missense_variant													missense_variant|MODERATE|DAPPUDRAFT_306162|DAPPUDRAFT_306162|transcript|EFX76541.1|protein_coding|1/3|c.132G>T|p.Met44Ile|132/4867|132/4452|44/1483||,A|downstream_gene_variant|MODIFIER|DAPPUDRAFT_322278|DAPPUDRAFT_322278|transcript|EFX76540.1|protein_coding||c.*3118G>T|||||3042|
294	C155	Nickel	Hom-Het	48	253411	GG	GT	Intergenic	249309	upstream_gene_variant													upstream_gene_variant|MODIFIER|DAPPUDRAFT_249309|DAPPUDRAFT_249309|transcript|EFX76204.1|protein_coding||c.-2246C>A|||||2246|,T|intergenic_region|MODIFIER|DAPPUDRAFT_249309-DAPPUDRAFT_249313|DAPPUDRAFT_249309-DAPPUDRAFT_249313|intergenic_region|DAPPUDRAFT_249309-DAPPUDRAFT_249313|||n.253412G>T||||||
295	C155	Nickel	Hom-Het	79	500083	CC	CT	Intergenic	254740	downstream_gene_variant													downstream_gene_variant|MODIFIER|DAPPUDRAFT_254740|DAPPUDRAFT_254740|transcript|EFX72231.1|protein_coding||c.*3047C>G|||||3047|,G|downstream_gene_variant|MODIFIER|DAPPUDRAFT_227614|DAPPUDRAFT_227614|transcript|EFX72232.1|protein_coding||c.*1025C>G|||||1025|,G|intron_variant|MODIFIER|DAPPUDRAFT_227615|DAPPUDRAFT_227615|transcript|EFX72247.1|protein_coding|11/12|c.2031+10G>C||||||
296	C155	Nickel	Hom-Het	80	262265	GG	GA	Intergenic	308548	downstream_gene_variant													downstream_gene_variant|MODIFIER|DAPPUDRAFT_308548|DAPPUDRAFT_308548|transcript|EFX72113.1|protein_coding||c.*5232G>A|||||4956|,A|intron_variant|MODIFIER|Gnao|DAPPUDRAFT_59367|transcript|EFX72162.1|protein_coding|4/7|c.465-46C>T||||||
297	C155	Nickel	Hom-Het	81	271952	TT	TC	Intergenic	254940	upstream_gene_variant													upstream_gene_variant|MODIFIER|DAPPUDRAFT_254940|DAPPUDRAFT_254940|transcript|EFX72070.1|protein_coding||c.-3227A>G|||||3227|,C|upstream_gene_variant|MODIFIER|DAPPUDRAFT_254943|DAPPUDRAFT_254943|transcript|EFX72031.1|protein_coding||c.-2545T>C|||||2545|,C|intergenic_region|MODIFIER|DAPPUDRAFT_254940-DAPPUDRAFT_254943|DAPPUDRAFT_254940-DAPPUDRAFT_254943|intergenic_region|DAPPUDRAFT_254940-DAPPUDRA…
298	C155	Nickel	Hom-Het	97	408293	AA	GA	Intronic	309358	3_prime_UTR_variant													3_prime_UTR_variant|MODIFIER|DAPPUDRAFT_309358|DAPPUDRAFT_309358|transcript|EFX70623.1|protein_coding|2/2|c.*111T>C|||||111|,G|upstream_gene_variant|MODIFIER|DAPPUDRAFT_309396|DAPPUDRAFT_309396|transcript|EFX70624.1|protein_coding||c.-4206T>C|||||4206|,G|downstream_gene_variant|MODIFIER|DAPPUDRAFT_328004|DAPPUDRAFT_328004|transcript|EFX70622.1|protein_coding||c.*4796T>C|||||4498|
299	C155	Nickel	Hom-Het	211	138452	TT	TA	Exonic	303545	missense_variant													missense_variant|MODERATE|DAPPUDRAFT_303545|DAPPUDRAFT_303545|transcript|EFX65744.1|protein_coding|4/9|c.939T>A|p.Asp313Glu|1097/3662|939/3300|313/1099||,A|upstream_gene_variant|MODIFIER|DAPPUDRAFT_117019|DAPPUDRAFT_117019|transcript|EFX65750.1|protein_coding||c.-1793A>T|||||1793|,A|upstream_gene_variant|MODIFIER|DAPPUDRAFT_303546|DAPPUDRAFT_303546|transcript|EFX65745.1|protein_coding||c.-4533T>A…
300	C155	Nickel	Hom-Het	359	22902	GG	GA	Intergenic	tRNA-Pseudo	upstream_gene_variant													upstream_gene_variant|MODIFIER|tRNA-Pseudo|EMDPUG00000004028|transcript|EMDPUT00000004028.1|pseudogene||n.-3242C>T|||||3242|,A|upstream_gene_variant|MODIFIER|tRNA-Met|EMDPUG00000003165|transcript|EMDPUT00000003165.1|protein_coding||c.-3098C>T|||||3098|WARNING_TRANSCRIPT_NO_START_CODON,A|upstream_gene_variant|MODIFIER|tRNA-Gly|EMDPUG00000000293|transcript|EMDPUT00000000293.1|protein_coding||c.-282…
301	C167	Nickel	Hom-Het	1	3383367	GG	AG	Intergenic	18307 / 232652	intergenic_region													intergenic_region|MODIFIER|DAPPUDRAFT_18307-DAPPUDRAFT_232652|DAPPUDRAFT_18307-DAPPUDRAFT_232652|intergenic_region|DAPPUDRAFT_18307-DAPPUDRAFT_232652|||n.3383368G>A||||||
302	C167	Nickel	Hom-Het	1	3802739	CC	TC	Intergenic	232691	downstream_gene_variant													downstream_gene_variant|MODIFIER|DAPPUDRAFT_232691|DAPPUDRAFT_232691|transcript|EFX90153.1|protein_coding||c.*2020C>T|||||2020|,T|non_coding_transcript_exon_variant|MODIFIER|DAPPUDRAFT_299566|DAPPUDRAFT_299566|transcript|DAPPUDRAFT_299566.2|pseudogene|1/6|n.262C>T||||||
303	C167	Nickel	Hom-Het	2	585444	CC	TC	Intergenic	94673	upstream_gene_variant													upstream_gene_variant|MODIFIER|DAPPUDRAFT_94673|DAPPUDRAFT_94673|transcript|EFX89239.1|protein_coding||c.-1120C>T|||||1120|,T|downstream_gene_variant|MODIFIER|DAPPUDRAFT_310169|DAPPUDRAFT_310169|transcript|EFX89784.1|protein_coding||c.*4990G>A|||||4990|,T|intron_variant|MODIFIER|DAPPUDRAFT_232921|DAPPUDRAFT_232921|transcript|EFX89238.1|protein_coding|4/4|c.224-248C>T||||||
304	C167	Nickel	Hom-Het	4	1624865	GG	AG	Intergenic	305495	upstream_gene_variant													upstream_gene_variant|MODIFIER|DAPPUDRAFT_305495|DAPPUDRAFT_305495|transcript|EFX88002.1|protein_coding||c.-3656G>A|||||3542|,A|intergenic_region|MODIFIER|DAPPUDRAFT_42083-DAPPUDRAFT_305495|DAPPUDRAFT_42083-DAPPUDRAFT_305495|intergenic_region|DAPPUDRAFT_42083-DAPPUDRAFT_305495|||n.1624866G>A||||||
305	C167	Nickel	Hom-Het	5	2075412	GG	GA	Exonic	42869	missense_variant													missense_variant|MODERATE|DAPPUDRAFT_42869|DAPPUDRAFT_42869|transcript|EFX87686.1|protein_coding|9/9|c.5606C>T|p.Pro1869Leu|5606/6816|5606/6816|1869/2271||,A|upstream_gene_variant|MODIFIER|DAPPUDRAFT_306569|DAPPUDRAFT_306569|transcript|EFX87687.1|protein_coding||c.-2497C>T|||||2366|
306	C167	Nickel	Hom-Het	6	1484639	CC	CT	Exonic	43798	synonymous_variant													synonymous_variant|LOW|DAPPUDRAFT_43798|DAPPUDRAFT_43798|transcript|EFX87285.1|protein_coding|11/11|c.1656G>A|p.Glu552Glu|1656/1758|1656/1758|552/585||WARNING_TRANSCRIPT_NO_START_CODON
307	C167	Nickel	Hom-Het	13	1168575	AA	AG	Intergenic	tRNA-Met	upstream_gene_variant													upstream_gene_variant|MODIFIER|tRNA-Met|EMDPUG00000004494|transcript|EMDPUT00000004494.1|protein_coding||c.-3710T>C|||||3710|WARNING_TRANSCRIPT_INCOMPLETE,G|upstream_gene_variant|MODIFIER|DAPPUDRAFT_239294|DAPPUDRAFT_239294|transcript|EFX84198.1|protein_coding||c.-1011T>C|||||1011|,G|upstream_gene_variant|MODIFIER|DAPPUDRAFT_239295|DAPPUDRAFT_239295|transcript|EFX84048.1|protein_coding||c.-2160A>…
308	C167	Nickel	Hom-Het	17	233844	GG	GT	Intergenic	316261	upstream_gene_variant													upstream_gene_variant|MODIFIER|DAPPUDRAFT_316261|DAPPUDRAFT_316261|transcript|EFX82880.1|protein_coding||c.-4573C>A|||||4573|,T|downstream_gene_variant|MODIFIER|SNORD24|EMDPUG00000005353|transcript|EMDPUT00000005353.1|snoRNA||n.*477C>A|||||477|,T|downstream_gene_variant|MODIFIER|Metazoa_SRP|EMDPUG00000002353|transcript|EMDPUT00000002353.2|pseudogene||n.*3461C>A|||||3461|,T|intron_variant|MODIFIER…
309	C167	Nickel	Hom-Het	33	31186	GG	AG	Exonic	319993	stop_gained													stop_gained|HIGH|DAPPUDRAFT_319993|DAPPUDRAFT_319993|transcript|EFX78955.1|protein_coding|4/7|c.1549C>T|p.Gln517*|1794/3303|1549/2895|517/964||,A|downstream_gene_variant|MODIFIER|DAPPUDRAFT_319994|DAPPUDRAFT_319994|transcript|EFX78954.1|protein_coding||c.*4564C>T|||||4456|
310	C167	Nickel	Hom-Het	34	724632	CC	CA	Intergenic	245970	upstream_gene_variant													upstream_gene_variant|MODIFIER|DAPPUDRAFT_245970|DAPPUDRAFT_245970|transcript|EFX78695.1|protein_coding||c.-3708G>T|||||3708|,A|upstream_gene_variant|MODIFIER|DAPPUDRAFT_105086|DAPPUDRAFT_105086|transcript|EFX78624.1|protein_coding||c.-4873C>A|||||4873|,A|intron_variant|MODIFIER|DAPPUDRAFT_245971|DAPPUDRAFT_245971|transcript|EFX78694.1|protein_coding|3/3|c.348+139G>T||||||
311	C167	Nickel	Hom-Het	44	254038	GG	TG	Intergenic	248432	downstream_gene_variant													downstream_gene_variant|MODIFIER|DAPPUDRAFT_248432|DAPPUDRAFT_248432|transcript|EFX76760.1|protein_coding||c.*166G>T|||||166|,T|downstream_gene_variant|MODIFIER|DAPPUDRAFT_106662|DAPPUDRAFT_106662|transcript|EFX76907.1|protein_coding||c.*2039C>A|||||2039|,T|intergenic_region|MODIFIER|DAPPUDRAFT_248432-DAPPUDRAFT_106662|DAPPUDRAFT_248432-DAPPUDRAFT_106662|intergenic_region|DAPPUDRAFT_248432-DAPPUD…
312	C167	Nickel	Hom-Het	46	294123	AA	AT	Intergenic	322297	upstream_gene_variant													upstream_gene_variant|MODIFIER|DAPPUDRAFT_322297|DAPPUDRAFT_322297|transcript|EFX76530.1|protein_coding||c.-3505T>A|||||3505|,T|upstream_gene_variant|MODIFIER|DAPPUDRAFT_3999|DAPPUDRAFT_3999|transcript|EFX76529.1|protein_coding||c.-2464T>A|||||2464|WARNING_TRANSCRIPT_NO_START_CODON,T|upstream_gene_variant|MODIFIER|DAPPUDRAFT_306128|DAPPUDRAFT_306128|transcript|EFX76528.1|protein_coding||c.-261T>A…
313	C167	Nickel	Hom-Het	97	204490	CC	TC	Intergenic	GNG1	intergenic_region													intergenic_region|MODIFIER|GNG1-DAPPUDRAFT_309380|DAPPUDRAFT_217190-DAPPUDRAFT_309380|intergenic_region|DAPPUDRAFT_217190-DAPPUDRAFT_309380|||n.204491C>T||||||
314	C167	Nickel	Hom-Het	97	414540	AA	AG	Exonic	328004	missense_variant													missense_variant|MODERATE|DAPPUDRAFT_328004|DAPPUDRAFT_328004|transcript|EFX70622.1|protein_coding|1/5|c.332T>C|p.Ile111Thr|600/2054|332/1488|111/495||,G|upstream_gene_variant|MODIFIER|DAPPUDRAFT_309362|DAPPUDRAFT_309362|transcript|EFX70608.1|protein_coding||c.-4813A>G|||||4735|,G|downstream_gene_variant|MODIFIER|DAPPUDRAFT_299674|DAPPUDRAFT_299674|transcript|EFX70621.1|protein_coding||c.*867T>C|…
315	C167	Nickel	Hom-Het	106	168338	AA	AT	Intergenic	257834	upstream_gene_variant													upstream_gene_variant|MODIFIER|DAPPUDRAFT_257834|DAPPUDRAFT_257834|transcript|EFX69897.1|protein_coding||c.-4350A>T|||||4350|,T|intron_variant|MODIFIER|DAPPUDRAFT_257832|DAPPUDRAFT_257832|transcript|EFX69896.1|protein_coding|6/8|c.2885-116A>T||||||
316	C167	Nickel	Hom-Het	112	202239	GG	GT	Exonic	328964	missense_variant													missense_variant|MODERATE|DAPPUDRAFT_328964|DAPPUDRAFT_328964|transcript|EFX69598.1|protein_coding|1/1|c.357C>A|p.Asp119Glu|357/462|357/462|119/153||,T|upstream_gene_variant|MODIFIER|DAPPUDRAFT_258368|DAPPUDRAFT_258368|transcript|EFX69599.1|protein_coding||c.-310C>A|||||310|
317	C167	Nickel	Hom-Het	215	33911	CC	TC	Intergenic	17071	downstream_gene_variant													downstream_gene_variant|MODIFIER|DAPPUDRAFT_17071|DAPPUDRAFT_17071|transcript|EFX65667.1|protein_coding||c.*852G>A|||||852|WARNING_TRANSCRIPT_NO_START_CODON,T|intergenic_region|MODIFIER|DAPPUDRAFT_117079-DAPPUDRAFT_17071|DAPPUDRAFT_117079-DAPPUDRAFT_17071|intergenic_region|DAPPUDRAFT_117079-DAPPUDRAFT_17071|||n.33912C>T||||||
318	C170	Nickel	Hom-Het	1	1337526	CC	TC	Intronic	300042	intron_variant													intron_variant|MODIFIER|DAPPUDRAFT_300042|DAPPUDRAFT_300042|transcript|EFX89956.1|protein_coding|3/10|c.448-206C>T||||||
319	C170	Nickel	Hom-Het	1	1337537	AA	CA	Intronic	300042	intron_variant													intron_variant|MODIFIER|DAPPUDRAFT_300042|DAPPUDRAFT_300042|transcript|EFX89956.1|protein_coding|3/10|c.448-195A>C||||||
320	C170	Nickel	Hom-Het	2	3205079	GG	AG	Intronic	233379	intron_variant													intron_variant|MODIFIER|DAPPUDRAFT_233379|DAPPUDRAFT_233379|transcript|EFX89564.1|protein_coding|20/77|c.2295+380C>T||||||
321	C170	Nickel	Hom-Het	3	1329947	AA	AG	Intergenic	304684	downstream_gene_variant													downstream_gene_variant|MODIFIER|DAPPUDRAFT_304684|DAPPUDRAFT_304684|transcript|EFX89061.1|protein_coding||c.*2736T>C|||||1952|,G|intergenic_region|MODIFIER|FAS-DAPPUDRAFT_304684|DAPPUDRAFT_346926-DAPPUDRAFT_304684|intergenic_region|DAPPUDRAFT_346926-DAPPUDRAFT_304684|||n.1329948A>G||||||
322	C170	Nickel	Hom-Het	3	3423204	TT	TG	Intergenic	95812	upstream_gene_variant													upstream_gene_variant|MODIFIER|DAPPUDRAFT_95812|DAPPUDRAFT_95812|transcript|EFX88858.1|protein_coding||c.-3131A>C|||||3131|,G|downstream_gene_variant|MODIFIER|DAPPUDRAFT_230283|DAPPUDRAFT_230283|transcript|EFX88788.1|protein_coding||c.*4810T>G|||||4736|,G|downstream_gene_variant|MODIFIER|DAPPUDRAFT_206542|DAPPUDRAFT_206542|transcript|EFX88789.1|protein_coding||c.*2004T>G|||||1954|,G|downstream_ge…
323	C170	Nickel	Hom-Het	3	3431520	CC	CT	Intronic	311160	intron_variant													intron_variant|MODIFIER|DAPPUDRAFT_311160|DAPPUDRAFT_311160|transcript|EFX88857.1|protein_coding|2/10|c.179-4853G>A||||||
324	C170	Nickel	Hom-Het	5	504875	GG	GT	Intronic	42745	intron_variant													intron_variant|MODIFIER|DAPPUDRAFT_42745|DAPPUDRAFT_42745|transcript|EFX87494.1|protein_coding|5/8|c.453+7766G>T||||||WARNING_TRANSCRIPT_NO_START_CODON
325	C170	Nickel	Hom-Het	7	180769	AA	AT	Intergenic	97492	downstream_gene_variant													downstream_gene_variant|MODIFIER|DAPPUDRAFT_97492|DAPPUDRAFT_97492|transcript|EFX86499.1|protein_coding||c.*2992A>T|||||2992|,T|intergenic_region|MODIFIER|DAPPUDRAFT_97492-DAPPUDRAFT_307821|DAPPUDRAFT_97492-DAPPUDRAFT_307821|intergenic_region|DAPPUDRAFT_97492-DAPPUDRAFT_307821|||n.180770A>T||||||
326	C170	Nickel	Hom-Het	8	1125293	TT	TA	Intergenic	236824	upstream_gene_variant													upstream_gene_variant|MODIFIER|DAPPUDRAFT_236824|DAPPUDRAFT_236824|transcript|EFX86165.1|protein_coding||c.-3403T>A|||||3403|,A|downstream_gene_variant|MODIFIER|DAPPUDRAFT_236823|DAPPUDRAFT_236823|transcript|EFX86164.1|protein_coding||c.*2394T>A|||||2394|,A|intron_variant|MODIFIER|WNT10|DAPPUDRAFT_290646|transcript|EFX86388.2|protein_coding|1/2|c.347-533A>T||||||
327	C170	Nickel	Hom-Het	12	820490	GG	GA	Intergenic	99526	upstream_gene_variant													upstream_gene_variant|MODIFIER|DAPPUDRAFT_99526|DAPPUDRAFT_99526|transcript|EFX84694.1|protein_coding||c.-2191C>T|||||2191|,A|upstream_gene_variant|MODIFIER|DAPPUDRAFT_99528|DAPPUDRAFT_99528|transcript|EFX84415.1|protein_coding||c.-1986G>A|||||1986|,A|upstream_gene_variant|MODIFIER|DAPPUDRAFT_314711|DAPPUDRAFT_314711|transcript|EFX84416.1|protein_coding||c.-4742G>A|||||4742|,A|downstream_gene_var…
328	C170	Nickel	Hom-Het	12	1415900	AA	AG	Exonic	314795	missense_variant													missense_variant|MODERATE|DAPPUDRAFT_314795|DAPPUDRAFT_314795|transcript|EFX84465.1|protein_coding|4/5|c.826A>G|p.Lys276Glu|826/1071|826/1071|276/356||,G|upstream_gene_variant|MODIFIER|DAPPUDRAFT_238824|DAPPUDRAFT_238824|transcript|EFX84639.1|protein_coding||c.-1135T>C|||||1135|,G|upstream_gene_variant|MODIFIER|DAPPUDRAFT_314796|DAPPUDRAFT_314796|transcript|EFX84466.1|protein_coding||c.-3139A>G||…
329	C170	Nickel	Hom-Het	15	434280	TT	TC	Intronic	240014	intron_variant													intron_variant|MODIFIER|DAPPUDRAFT_240014|DAPPUDRAFT_240014|transcript|EFX83288.1|protein_coding|2/4|c.119-585T>C||||||
330	C170	Nickel	Hom-Het	15	840968	TT	AT	Intergenic	100606	downstream_gene_variant													downstream_gene_variant|MODIFIER|DAPPUDRAFT_100606|DAPPUDRAFT_100606|transcript|EFX83323.1|protein_coding||c.*380T>A|||||380|,A|downstream_gene_variant|MODIFIER|DAPPUDRAFT_301866|DAPPUDRAFT_301866|transcript|EFX83478.1|protein_coding||c.*4097A>T|||||3203|,A|intergenic_region|MODIFIER|DAPPUDRAFT_100606-DAPPUDRAFT_301866|DAPPUDRAFT_100606-DAPPUDRAFT_301866|intergenic_region|DAPPUDRAFT_100606-DAPPUD…
331	C170	Nickel	Hom-Het	15	1458143	CC	CG	Intergenic	100710	upstream_gene_variant													upstream_gene_variant|MODIFIER|DAPPUDRAFT_100710|DAPPUDRAFT_100710|transcript|EFX83422.1|protein_coding||c.-3886G>C|||||3886|,G|upstream_gene_variant|MODIFIER|DAPPUDRAFT_315888|DAPPUDRAFT_315888|transcript|EFX83421.1|protein_coding||c.-2039G>C|||||2039|,G|upstream_gene_variant|MODIFIER|DAPPUDRAFT_315889|DAPPUDRAFT_315889|transcript|EFX83420.1|protein_coding||c.-384G>C|||||384|,G|downstream_gene_v…
332	C170	Nickel	Hom-Het	16	835337	GG	GA	Intergenic	223533	upstream_gene_variant													upstream_gene_variant|MODIFIER|DAPPUDRAFT_223533|DAPPUDRAFT_223533|transcript|EFX83136.1|protein_coding||c.-4342C>T|||||3913|,A|upstream_gene_variant|MODIFIER|DAPPUDRAFT_302122|DAPPUDRAFT_302122|transcript|EFX83135.1|protein_coding||c.-394C>T|||||394|,A|intergenic_region|MODIFIER|DAPPUDRAFT_302122-DAPPUDRAFT_100888|DAPPUDRAFT_302122-DAPPUDRAFT_100888|intergenic_region|DAPPUDRAFT_302122-DAPPUDRAFT…
333	C170	Nickel	Hom-Het	25	243043	AA	AG	Intergenic	tRNA-Thr	upstream_gene_variant													upstream_gene_variant|MODIFIER|tRNA-Thr|EMDPUG00000003276|transcript|EMDPUT00000003276.1|protein_coding||c.-3133T>C|||||3133|WARNING_TRANSCRIPT_MULTIPLE_STOP_CODONS,G|upstream_gene_variant|MODIFIER|tRNA-Thr|EMDPUG00000003890|transcript|EMDPUT00000003890.1|protein_coding||c.-1081A>G|||||1081|WARNING_TRANSCRIPT_MULTIPLE_STOP_CODONS,G|downstream_gene_variant|MODIFIER|DAPPUDRAFT_304072|DAPPUDRAFT_304…
334	C170	Nickel	Hom-Het	25	477818	CC	TC	Intergenic	PTEROPSIN8 / 318510	intergenic_region													intergenic_region|MODIFIER|DAPPUDRAFT_318510-PTEROPSIN8|DAPPUDRAFT_318510-DAPPUDRAFT_346985|intergenic_region|DAPPUDRAFT_318510-DAPPUDRAFT_346985|||n.477819C>T||||||
335	C170	Nickel	Hom-Het	25	477820	CC	CT	Intergenic	PTEROPSIN8 / 318510	intergenic_region													intergenic_region|MODIFIER|DAPPUDRAFT_318510-PTEROPSIN8|DAPPUDRAFT_318510-DAPPUDRAFT_346985|intergenic_region|DAPPUDRAFT_318510-DAPPUDRAFT_346985|||n.477821C>T||||||
336	C170	Nickel	Hom-Het	47	259147	GG	AG	Intergenic	107099	upstream_gene_variant													upstream_gene_variant|MODIFIER|DAPPUDRAFT_107099|DAPPUDRAFT_107099|transcript|EFX76368.1|protein_coding||c.-1347C>T|||||1347|,A|intergenic_region|MODIFIER|DAPPUDRAFT_107099-DAPPUDRAFT_249137|DAPPUDRAFT_107099-DAPPUDRAFT_249137|intergenic_region|DAPPUDRAFT_107099-DAPPUDRAFT_249137|||n.259148G>A||||||
337	C170	Nickel	Hom-Het	77	250590	AA	AT	Intergenic	308268	upstream_gene_variant													upstream_gene_variant|MODIFIER|DAPPUDRAFT_308268|DAPPUDRAFT_308268|transcript|EFX72511.1|protein_coding||c.-4052T>A|||||3698|,T|upstream_gene_variant|MODIFIER|DAPPUDRAFT_308269|DAPPUDRAFT_308269|transcript|EFX72449.1|protein_coding||c.-1889A>T|||||1889|,T|downstream_gene_variant|MODIFIER|DAPPUDRAFT_326182|DAPPUDRAFT_326182|transcript|EFX72448.1|protein_coding||c.*302A>T|||||302|WARNING_TRANSCRIPT…
338	C170	Nickel	Hom-Het	81	474947	GG	GA	Intergenic	111163	upstream_gene_variant													upstream_gene_variant|MODIFIER|DAPPUDRAFT_111163|DAPPUDRAFT_111163|transcript|EFX72051.1|protein_coding||c.-644C>T|||||644|,A|upstream_gene_variant|MODIFIER|DAPPUDRAFT_59478|DAPPUDRAFT_59478|transcript|EFX72044.1|protein_coding||c.-27G>A|||||27|WARNING_TRANSCRIPT_NO_START_CODON,A|downstream_gene_variant|MODIFIER|DAPPUDRAFT_326648|DAPPUDRAFT_326648|transcript|EFX72050.1|protein_coding||c.*1898C>T|…
339	C170	Nickel	Hom-Het	149	237605	AA	TA	Intergenic	330844 / 115261	intergenic_region													intergenic_region|MODIFIER|DAPPUDRAFT_330844-DAPPUDRAFT_115261|DAPPUDRAFT_330844-DAPPUDRAFT_115261|intergenic_region|DAPPUDRAFT_330844-DAPPUDRAFT_115261|||n.237606A>T||||||
340	C170	Nickel	Hom-Het	158	188813	GG	GA	Intergenic	331182 / 261816	intergenic_region													intergenic_region|MODIFIER|DAPPUDRAFT_331182-DAPPUDRAFT_261816|DAPPUDRAFT_331182-DAPPUDRAFT_261816|intergenic_region|DAPPUDRAFT_331182-DAPPUDRAFT_261816|||n.188814G>A||||||
341	C170	Nickel	Hom-Het	422	23801	GG	GA	Exonic	334839	missense_variant													missense_variant|MODERATE|DAPPUDRAFT_334839|DAPPUDRAFT_334839|transcript|EFX63890.1|protein_coding|4/4|c.629G>A|p.Arg210Lys|629/1578|629/1578|210/525||,A|upstream_gene_variant|MODIFIER|DAPPUDRAFT_305933|DAPPUDRAFT_305933|transcript|EFX63900.1|protein_coding||c.-1254C>T|||||1151|,A|upstream_gene_variant|MODIFIER|DAPPUDRAFT_334840|DAPPUDRAFT_334840|transcript|EFX63891.1|protein_coding||c.-1552G>A||…
342	C171	Nickel	Hom-Het	1	3579089	TT	TG	Intergenic	94463 / 232681	intergenic_region													intergenic_region|MODIFIER|DAPPUDRAFT_94463-DAPPUDRAFT_232681|DAPPUDRAFT_94463-DAPPUDRAFT_232681|intergenic_region|DAPPUDRAFT_94463-DAPPUDRAFT_232681|||n.3579090T>G||||||
343	C171	Nickel	Hom-Het	54	567394	GG	AG	Exonic	8518	synonymous_variant													synonymous_variant|LOW|DAPPUDRAFT_8518|DAPPUDRAFT_8518|transcript|EFX75309.1|protein_coding|1/1|c.75C>T|p.Ile25Ile|75/189|75/189|25/62||WARNING_TRANSCRIPT_NO_START_CODON,A|upstream_gene_variant|MODIFIER|DAPPUDRAFT_250656|DAPPUDRAFT_250656|transcript|EFX75253.1|protein_coding||c.-2672G>A|||||2672|,A|downstream_gene_variant|MODIFIER|SerR.3|DAPPUDRAFT_7660|transcript|EFX75308.1|protein_coding||c.*22…
344	C171	Nickel	Hom-Het	98	489558	CC	CT	Intergenic	309408	upstream_gene_variant													upstream_gene_variant|MODIFIER|DAPPUDRAFT_309408|DAPPUDRAFT_309408|transcript|EFX70522.1|protein_coding||c.-1826C>T|||||1672|,T|downstream_gene_variant|MODIFIER|DAPPUDRAFT_347275|DAPPUDRAFT_347275|transcript|EFX70521.2|protein_coding||c.*1345C>T|||||1345|,T|intergenic_region|MODIFIER|DAPPUDRAFT_347275-DAPPUDRAFT_309408|DAPPUDRAFT_347275-DAPPUDRAFT_309408|intergenic_region|DAPPUDRAFT_347275-DAPPUD…
345	C171	Nickel	Hom-Het	100	144334	CC	CT	Intergenic	257207	upstream_gene_variant													upstream_gene_variant|MODIFIER|DAPPUDRAFT_257207|DAPPUDRAFT_257207|transcript|EFX70367.1|protein_coding||c.-3952G>A|||||3952|,T|upstream_gene_variant|MODIFIER|DAPPUDRAFT_257208|DAPPUDRAFT_257208|transcript|EFX70366.1|protein_coding||c.-1576G>A|||||1576|,T|downstream_gene_variant|MODIFIER|FPN2|DAPPUDRAFT_328147|transcript|EFX70364.1|protein_coding||c.*2561G>A|||||2561|,T|intron_variant|MODIFIER|DA…
346	C178	Nickel	Hom-Het	1	2464527	TT	TC	Exonic	205304	missense_variant													missense_variant|MODERATE|DAPPUDRAFT_205304|DAPPUDRAFT_205304|transcript|EFX90287.1|protein_coding|6/7|c.992A>G|p.Asn331Ser|1033/1873|992/1113|331/370||,C|upstream_gene_variant|MODIFIER|DAPPUDRAFT_299903|DAPPUDRAFT_299903|transcript|EFX90288.1|protein_coding||c.-1183A>G|||||1057|,C|downstream_gene_variant|MODIFIER|DAPPUDRAFT_309841|DAPPUDRAFT_309841|transcript|EFX90286.1|protein_coding||c.*3879A>…
347	C178	Nickel	Hom-Het	1	3600436	CC	CA	Intergenic	94463 / 232681	intergenic_region													intergenic_region|MODIFIER|DAPPUDRAFT_94463-DAPPUDRAFT_232681|DAPPUDRAFT_94463-DAPPUDRAFT_232681|intergenic_region|DAPPUDRAFT_94463-DAPPUDRAFT_232681|||n.3600437C>A||||||
348	C178	Nickel	Hom-Het	2	864813	AA	AT	Intergenic	220403	upstream_gene_variant													upstream_gene_variant|MODIFIER|DAPPUDRAFT_220403|DAPPUDRAFT_220403|transcript|EFX89749.1|protein_coding||c.-3159T>A|||||3102|,T|upstream_gene_variant|MODIFIER|DAPPUDRAFT_220405|DAPPUDRAFT_220405|transcript|EFX89748.1|protein_coding||c.-1287T>A|||||1224|,T|upstream_gene_variant|MODIFIER|DAPPUDRAFT_94739|DAPPUDRAFT_94739|transcript|EFX89264.1|protein_coding||c.-2036A>T|||||2036|,T|intron_variant|MO…
349	C178	Nickel	Hom-Het	2	864822	CC	CT	Intergenic	220403	upstream_gene_variant													upstream_gene_variant|MODIFIER|DAPPUDRAFT_220403|DAPPUDRAFT_220403|transcript|EFX89749.1|protein_coding||c.-3168G>A|||||3111|,T|upstream_gene_variant|MODIFIER|DAPPUDRAFT_220405|DAPPUDRAFT_220405|transcript|EFX89748.1|protein_coding||c.-1296G>A|||||1233|,T|upstream_gene_variant|MODIFIER|DAPPUDRAFT_94739|DAPPUDRAFT_94739|transcript|EFX89264.1|protein_coding||c.-2027C>T|||||2027|,T|intron_variant|MO…
350	C178	Nickel	Hom-Het	2	864831	TT	TC	Intergenic	220403	upstream_gene_variant													upstream_gene_variant|MODIFIER|DAPPUDRAFT_220403|DAPPUDRAFT_220403|transcript|EFX89749.1|protein_coding||c.-3177A>G|||||3120|,C|upstream_gene_variant|MODIFIER|DAPPUDRAFT_220405|DAPPUDRAFT_220405|transcript|EFX89748.1|protein_coding||c.-1305A>G|||||1242|,C|upstream_gene_variant|MODIFIER|DAPPUDRAFT_94739|DAPPUDRAFT_94739|transcript|EFX89264.1|protein_coding||c.-2018T>C|||||2018|,C|intron_variant|MO…
351	C178	Nickel	Hom-Het	2	1058243	CC	CA	Intergenic	303141	upstream_gene_variant													upstream_gene_variant|MODIFIER|DAPPUDRAFT_303141|DAPPUDRAFT_303141|transcript|EFX89280.1|protein_coding||c.-2046C>A|||||2046|,A|downstream_gene_variant|MODIFIER|DAPPUDRAFT_303140|DAPPUDRAFT_303140|transcript|EFX89279.1|protein_coding||c.*1905C>A|||||1599|,A|intron_variant|MODIFIER|DAPPUDRAFT_126738|DAPPUDRAFT_126738|transcript|EFX89731.1|protein_coding|7/9|c.1034-39G>T||||||
352	C178	Nickel	Hom-Het	3	3165346	CC	TC	Intergenic	220996	downstream_gene_variant													downstream_gene_variant|MODIFIER|DAPPUDRAFT_220996|DAPPUDRAFT_220996|transcript|EFX88768.1|protein_coding||c.*4003C>T|||||4003|,T|downstream_gene_variant|MODIFIER|DAPPUDRAFT_18240|DAPPUDRAFT_18240|transcript|EFX88886.1|protein_coding||c.*648G>A|||||648|WARNING_TRANSCRIPT_NO_START_CODON,T|downstream_gene_variant|MODIFIER|DAPPUDRAFT_27756|DAPPUDRAFT_27756|transcript|EFX88885.1|protein_coding||c.*20…
353	C178	Nickel	Hom-Het	7	588446	TT	TG	Intergenic	44321	upstream_gene_variant													upstream_gene_variant|MODIFIER|DAPPUDRAFT_44321|DAPPUDRAFT_44321|transcript|EFX86513.1|protein_coding||c.-1616T>G|||||1616|WARNING_TRANSCRIPT_NO_START_CODON,G|downstream_gene_variant|MODIFIER|DAPPUDRAFT_236247|DAPPUDRAFT_236247|transcript|EFX86512.1|protein_coding||c.*1159T>G|||||1159|,G|intergenic_region|MODIFIER|DAPPUDRAFT_236247-DAPPUDRAFT_44321|DAPPUDRAFT_236247-DAPPUDRAFT_44321|intergenic_re…
354	C178	Nickel	Hom-Het	9	1310357	TT	TG	Intronic	313646	3_prime_UTR_variant													3_prime_UTR_variant|MODIFIER|DAPPUDRAFT_313646|DAPPUDRAFT_313646|transcript|EFX85806.1|protein_coding|3/3|c.*39T>A|||||39|,A|upstream_gene_variant|MODIFIER|DAPPUDRAFT_313645|DAPPUDRAFT_313645|transcript|EFX85939.1|protein_coding||c.-1741A>T|||||1741|,A|downstream_gene_variant|MODIFIER|DAPPUDRAFT_313648|DAPPUDRAFT_313648|transcript|EFX85938.1|protein_coding||c.*2509A>T|||||2509|
355	C178	Nickel	Hom-Het	15	628926	AA	AG	Intergenic	240048 / 195083	intergenic_region													intergenic_region|MODIFIER|DAPPUDRAFT_240048-DAPPUDRAFT_195083|DAPPUDRAFT_240048-DAPPUDRAFT_195083|intergenic_region|DAPPUDRAFT_240048-DAPPUDRAFT_195083|||n.628927A>G||||||
356	C178	Nickel	Hom-Het	16	355005	CC	GC	Intronic	240350	intron_variant													intron_variant|MODIFIER|DAPPUDRAFT_240350|DAPPUDRAFT_240350|transcript|EFX82944.1|protein_coding|15/26|c.2130-42C>G||||||
357	C178	Nickel	Hom-Het	18	556560	CC	CG	Exonic	101570	missense_variant													missense_variant|MODERATE|DAPPUDRAFT_101570|DAPPUDRAFT_101570|transcript|EFX82137.1|protein_coding|2/2|c.819C>G|p.Ser273Arg|819/1344|819/1344|273/447||,G|upstream_gene_variant|MODIFIER|DAPPUDRAFT_241248|DAPPUDRAFT_241248|transcript|EFX82425.1|protein_coding||c.-2478G>C|||||2478|,G|upstream_gene_variant|MODIFIER|DAPPUDRAFT_241250|DAPPUDRAFT_241250|transcript|EFX82138.1|protein_coding||c.-2077C>G||…
358	C178	Nickel	Hom-Het	37	958873	GG	GA	Exonic	320914	missense_variant													missense_variant|MODERATE|DAPPUDRAFT_320914|DAPPUDRAFT_320914|transcript|EFX78004.1|protein_coding|9/15|c.6905C>T|p.Ala2302Val|6905/8691|6905/8691|2302/2896||
359	C178	Nickel	Hom-Het	38	719245	GG	GT	Intergenic	305303 / 321047	intergenic_region													intergenic_region|MODIFIER|DAPPUDRAFT_305303-DAPPUDRAFT_321047|DAPPUDRAFT_305303-DAPPUDRAFT_321047|intergenic_region|DAPPUDRAFT_305303-DAPPUDRAFT_321047|||n.719246G>T||||||
360	C178	Nickel	Hom-Het	41	507767	GG	GA	Intergenic	54327	upstream_gene_variant													upstream_gene_variant|MODIFIER|DAPPUDRAFT_54327|DAPPUDRAFT_54327|transcript|EFX77366.1|protein_coding||c.-898C>T|||||898|WARNING_TRANSCRIPT_NO_START_CODON,A|downstream_gene_variant|MODIFIER|DAPPUDRAFT_321529|DAPPUDRAFT_321529|transcript|EFX77365.1|protein_coding||c.*273C>T|||||273|,A|downstream_gene_variant|MODIFIER|DAPPUDRAFT_321530|DAPPUDRAFT_321530|transcript|EFX77364.1|protein_coding||c.*1977…
361	C178	Nickel	Hom-Het	41	687230	GG	AG	Exonic	305847	synonymous_variant													synonymous_variant|LOW|DAPPUDRAFT_305847|DAPPUDRAFT_305847|transcript|EFX77288.1|protein_coding|4/9|c.438G>A|p.Leu146Leu|548/1677|438/1479|146/492||,A|upstream_gene_variant|MODIFIER|DAPPUDRAFT_247867|DAPPUDRAFT_247867|transcript|EFX77289.1|protein_coding||c.-3120G>A|||||3120|
362	C178	Nickel	Hom-Het	46	466447	GG	TG	Intergenic	55210	upstream_gene_variant													upstream_gene_variant|MODIFIER|DAPPUDRAFT_55210|DAPPUDRAFT_55210|transcript|EFX76507.1|protein_coding||c.-4484C>A|||||4484|WARNING_TRANSCRIPT_NO_START_CODON,T|intergenic_region|MODIFIER|DAPPUDRAFT_55210-DAPPUDRAFT_106993|DAPPUDRAFT_55210-DAPPUDRAFT_106993|intergenic_region|DAPPUDRAFT_55210-DAPPUDRAFT_106993|||n.466448G>T||||||
363	C178	Nickel	Hom-Het	98	477527	GG	GT	Exonic	257045	missense_variant													missense_variant|MODERATE|DAPPUDRAFT_257045|DAPPUDRAFT_257045|transcript|EFX70520.1|protein_coding|9/18|c.1946G>T|p.Gly649Val|1946/4014|1946/4014|649/1337||
364	C178	Nickel	Hom-Het	113	187635	AA	AT	Intergenic	347354	upstream_gene_variant													upstream_gene_variant|MODIFIER|DAPPUDRAFT_347354|DAPPUDRAFT_347354|transcript|EFX69544.1|protein_coding||c.-3750T>A|||||3720|,T|upstream_gene_variant|MODIFIER|DAPPUDRAFT_300917|DAPPUDRAFT_300917|transcript|EFX69543.1|protein_coding||c.-380T>A|||||344|,T|downstream_gene_variant|MODIFIER|DAPPUDRAFT_300910|DAPPUDRAFT_300910|transcript|EFX69542.1|protein_coding||c.*2958T>A|||||2674|,T|intergenic_regi…
365	C178	Nickel	Hom-Het	113	249503	GG	AG	Intronic	62157	intron_variant													intron_variant|MODIFIER|DAPPUDRAFT_62157|DAPPUDRAFT_62157|transcript|EFX69526.1|protein_coding|2/8|c.416+1872G>A||||||
366	C178	Nickel	Hom-Het	139	195237	CC	CT	Exonic	260514	synonymous_variant													synonymous_variant|LOW|DAPPUDRAFT_260514|DAPPUDRAFT_260514|transcript|EFX68169.1|protein_coding|3/5|c.246G>A|p.Ser82Ser|246/321|246/321|82/106||,T|upstream_gene_variant|MODIFIER|DAPPUDRAFT_260513|DAPPUDRAFT_260513|transcript|EFX68170.1|protein_coding||c.-2441G>A|||||2441|,T|upstream_gene_variant|MODIFIER|DAPPUDRAFT_114824|DAPPUDRAFT_114824|transcript|EFX68147.1|protein_coding||c.-3131C>T|||||3131…
367	C178	Nickel	Hom-Het	142	29400	CC	CG	Intergenic	260713	upstream_gene_variant													upstream_gene_variant|MODIFIER|DAPPUDRAFT_260713|DAPPUDRAFT_260713|transcript|EFX67976.1|protein_coding||c.-2751C>G|||||2751|,G|intron_variant|MODIFIER|DAPPUDRAFT_442635|DAPPUDRAFT_442635|transcript|EFX68032.2|protein_coding|2/8|c.123+295G>C||||||
368	C178	Nickel	Hom-Het	154	180557	CC	CA	Intergenic	261546	upstream_gene_variant													upstream_gene_variant|MODIFIER|DAPPUDRAFT_261546|DAPPUDRAFT_261546|transcript|EFX67514.1|protein_coding||c.-4662G>T|||||4662|,A|intron_variant|MODIFIER|DAPPUDRAFT_330995|DAPPUDRAFT_330995|transcript|EFX67513.1|protein_coding|1/1|c.963-3155G>T||||||
369	C178	Nickel	Hom-Het	155	264961	TT	TG	Intergenic	331038	upstream_gene_variant													upstream_gene_variant|MODIFIER|DAPPUDRAFT_331038|DAPPUDRAFT_331038|transcript|EFX67480.1|protein_coding||c.-4074A>C|||||4074|,G|upstream_gene_variant|MODIFIER|DAPPUDRAFT_331039|DAPPUDRAFT_331039|transcript|EFX67479.1|protein_coding||c.-861A>C|||||861|,G|upstream_gene_variant|MODIFIER|DAPPUDRAFT_302006|DAPPUDRAFT_302006|transcript|EFX67471.1|protein_coding||c.-2569T>G|||||2484|,G|upstream_gene_var…
370	C178	Nickel	Hom-Het	668	45388	CC	CT	Intergenic	335582	upstream_gene_variant													upstream_gene_variant|MODIFIER|DAPPUDRAFT_335582|DAPPUDRAFT_335582|transcript|EFX63354.1|protein_coding||c.-2207G>A|||||2207|,T|downstream_gene_variant|MODIFIER|DAPPUDRAFT_35911|DAPPUDRAFT_35911|transcript|EFX63353.1|protein_coding||c.*2241G>A|||||2241|WARNING_TRANSCRIPT_NO_START_CODON,T|downstream_gene_variant|MODIFIER|DAPPUDRAFT_268614|DAPPUDRAFT_268614|transcript|EFX63352.1|protein_coding||c.*…
371	C181	Nickel	Hom-Het	1	4189569	CC	CA	Exonic	299981	missense_variant													missense_variant|MODERATE|DAPPUDRAFT_299981|DAPPUDRAFT_299981|transcript|EFX90181.1|protein_coding|1/8|c.66G>T|p.Leu22Phe|102/1489|66/1335|22/444||,A|upstream_gene_variant|MODIFIER|DAPPUDRAFT_346923|DAPPUDRAFT_346923|transcript|EFX90182.1|protein_coding||c.-2452G>T|||||2297|,A|upstream_gene_variant|MODIFIER|DAPPUDRAFT_39904|DAPPUDRAFT_39904|transcript|EFX90179.1|protein_coding||c.-635C>A|||||635|…
372	C181	Nickel	Hom-Het	3	1915036	GG	GA	Intergenic	41064	upstream_gene_variant													upstream_gene_variant|MODIFIER|DAPPUDRAFT_41064|DAPPUDRAFT_41064|transcript|EFX88997.1|protein_coding||c.-1436C>T|||||1436|,A|intergenic_region|MODIFIER|DAPPUDRAFT_41064-DAPPUDRAFT_304719|DAPPUDRAFT_41064-DAPPUDRAFT_304719|intergenic_region|DAPPUDRAFT_41064-DAPPUDRAFT_304719|||n.1915037G>A||||||
373	C181	Nickel	Hom-Het	11	786808	GG	AG	Exonic	314376	synonymous_variant													synonymous_variant|LOW|DAPPUDRAFT_314376|DAPPUDRAFT_314376|transcript|EFX85098.1|protein_coding|4/4|c.1347C>T|p.Ser449Ser|1347/1422|1347/1422|449/473||,A|upstream_gene_variant|MODIFIER|DAPPUDRAFT_314375|DAPPUDRAFT_314375|transcript|EFX85099.1|protein_coding||c.-1521C>T|||||1521|,A|downstream_gene_variant|MODIFIER|DAPPUDRAFT_222746|DAPPUDRAFT_222746|transcript|EFX85097.1|protein_coding||c.*3174C>T…
374	C181	Nickel	Hom-Het	20	107788	CC	CT	Intergenic	102056	downstream_gene_variant													downstream_gene_variant|MODIFIER|DAPPUDRAFT_102056|DAPPUDRAFT_102056|transcript|EFX81592.1|protein_coding||c.*995C>T|||||995|,T|intergenic_region|MODIFIER|DAPPUDRAFT_102056-DAPPUDRAFT_241855|DAPPUDRAFT_102056-DAPPUDRAFT_241855|intergenic_region|DAPPUDRAFT_102056-DAPPUDRAFT_241855|||n.107789C>T||||||
375	C181	Nickel	Hom-Het	27	81068	CC	CG	Intergenic	318946	upstream_gene_variant													upstream_gene_variant|MODIFIER|DAPPUDRAFT_318946|DAPPUDRAFT_318946|transcript|EFX79941.1|protein_coding||c.-1615C>G|||||1615|,G|intergenic_region|MODIFIER|DAPPUDRAFT_103764-DAPPUDRAFT_318946|DAPPUDRAFT_103764-DAPPUDRAFT_318946|intergenic_region|DAPPUDRAFT_103764-DAPPUDRAFT_318946|||n.81069C>G||||||
376	C181	Nickel	Hom-Het	60	410019	CC	CT	Intergenic	56955 / 307186	intergenic_region													intergenic_region|MODIFIER|DAPPUDRAFT_56955-DAPPUDRAFT_307186|DAPPUDRAFT_56955-DAPPUDRAFT_307186|intergenic_region|DAPPUDRAFT_56955-DAPPUDRAFT_307186|||n.410020C>T||||||
377	C182	Nickel	Hom-Het	1	2912875	CC	CA	Intergenic	94386	upstream_gene_variant													upstream_gene_variant|MODIFIER|DAPPUDRAFT_94386|DAPPUDRAFT_94386|transcript|EFX90250.1|protein_coding||c.-1170G>T|||||1170|,A|downstream_gene_variant|MODIFIER|DAPPUDRAFT_299933|DAPPUDRAFT_299933|transcript|EFX90110.1|protein_coding||c.*4470C>A|||||4392|,A|downstream_gene_variant|MODIFIER|DAPPUDRAFT_300142|DAPPUDRAFT_300142|transcript|EFX90248.1|protein_coding||c.*3579G>T|||||3450|,A|intron_varian…
378	C182	Nickel	Hom-Het	2	457800	AA	GA	Exonic	310153	synonymous_variant													synonymous_variant|LOW|DAPPUDRAFT_310153|DAPPUDRAFT_310153|transcript|EFX89798.1|protein_coding|1/6|c.210T>C|p.Ile70Ile|210/2073|210/2073|70/690||,G|upstream_gene_variant|MODIFIER|DAPPUDRAFT_299561|DAPPUDRAFT_299561|transcript|EFX89230.2|protein_coding||c.-504A>G|||||349|,G|upstream_gene_variant|MODIFIER|DAPPUDRAFT_1152|DAPPUDRAFT_1152|transcript|EFX89231.1|protein_coding||c.-4879A>G|||||4879|WAR…
379	C182	Nickel	Hom-Het	2	2843019	TT	TA	Exonic	303213	stop_gained													stop_gained|HIGH|DAPPUDRAFT_303213|DAPPUDRAFT_303213|transcript|EFX89583.1|protein_coding|38/43|c.9475A>T|p.Lys3159*|9475/10682|9475/10410|3159/3469||,A|upstream_gene_variant|MODIFIER|DAPPUDRAFT_40502|DAPPUDRAFT_40502|transcript|EFX89584.1|protein_coding||c.-4857A>T|||||4857|,A|downstream_gene_variant|MODIFIER|DAPPUDRAFT_303036|DAPPUDRAFT_303036|transcript|EFX89426.1|protein_coding||c.*1718T>A|||…
380	C182	Nickel	Hom-Het	4	227596	GG	TG	Exonic	95911	stop_gained													stop_gained|HIGH|DAPPUDRAFT_95911|DAPPUDRAFT_95911|transcript|EFX87865.1|protein_coding|4/5|c.310G>T|p.Glu104*|310/534|310/534|104/177||,T|upstream_gene_variant|MODIFIER|DAPPUDRAFT_311255|DAPPUDRAFT_311255|transcript|EFX87866.1|protein_coding||c.-4442G>T|||||4442|,T|downstream_gene_variant|MODIFIER|DAPPUDRAFT_230293|DAPPUDRAFT_230293|transcript|EFX87864.1|protein_coding||c.*4457G>T|||||3805|,T|do…
381	C182	Nickel	Hom-Het	9	1584284	GG	AG	Intronic	45422	intron_variant													intron_variant|MODIFIER|DAPPUDRAFT_45422|DAPPUDRAFT_45422|transcript|EFX85922.1|protein_coding|2/5|c.241-693C>T||||||WARNING_TRANSCRIPT_NO_START_CODON
382	C182	Nickel	Hom-Het	12	383564	GG	AG	Intronic	238621	intron_variant													intron_variant|MODIFIER|DAPPUDRAFT_238621|DAPPUDRAFT_238621|transcript|EFX84363.1|protein_coding|4/6|c.273+2564G>A||||||
383	C182	Nickel	Hom-Het	30	496917	GG	GT	Exonic	20391	missense_variant													missense_variant|MODERATE|DAPPUDRAFT_20391|DAPPUDRAFT_20391|transcript|EFX79437.1|protein_coding|8/17|c.975C>A|p.Asn325Lys|975/3126|975/3126|325/1041||WARNING_TRANSCRIPT_NO_START_CODON,T|upstream_gene_variant|MODIFIER|DAPPUDRAFT_319583|DAPPUDRAFT_319583|transcript|EFX79438.1|protein_coding||c.-3641C>A|||||3641|,T|downstream_gene_variant|MODIFIER|DAPPUDRAFT_304854|DAPPUDRAFT_304854|transcript|EFX7…
384	C182	Nickel	Hom-Het	31	975559	CC	CT	Exonic	304960	synonymous_variant													synonymous_variant|LOW|DAPPUDRAFT_304960|DAPPUDRAFT_304960|transcript|EFX79172.1|protein_coding|15/23|c.3541C>T|p.Leu1181Leu|3541/6028|3541/5916|1181/1971||,T|upstream_gene_variant|MODIFIER|DAPPUDRAFT_304914|DAPPUDRAFT_304914|transcript|EFX79173.1|protein_coding||c.-5091C>T|||||4823|,T|downstream_gene_variant|MODIFIER|DAPPUDRAFT_304913|DAPPUDRAFT_304913|transcript|EFX79211.1|protein_coding||c.*32…
385	C182	Nickel	Hom-Het	48	406186	GG	GT	Intergenic	249341 / 322589	intergenic_region													intergenic_region|MODIFIER|DAPPUDRAFT_249341-DAPPUDRAFT_322589|DAPPUDRAFT_249341-DAPPUDRAFT_322589|intergenic_region|DAPPUDRAFT_249341-DAPPUDRAFT_322589|||n.406187G>T||||||
386	C182	Nickel	Hom-Het	69	407365	AA	AG	Intergenic	231352	upstream_gene_variant													upstream_gene_variant|MODIFIER|DAPPUDRAFT_231352|DAPPUDRAFT_231352|transcript|EFX73371.1|protein_coding||c.-2724A>G|||||2600|,G|downstream_gene_variant|MODIFIER|DAPPUDRAFT_253254|DAPPUDRAFT_253254|transcript|EFX73369.1|protein_coding||c.*1747A>G|||||1747|,G|downstream_gene_variant|MODIFIER|DAPPUDRAFT_307706|DAPPUDRAFT_307706|transcript|EFX73415.1|protein_coding||c.*4373T>C|||||4354|,G|intron_vari…
387	C182	Nickel	Hom-Het	90	357124	GG	GT	Intergenic	93396	upstream_gene_variant													upstream_gene_variant|MODIFIER|DAPPUDRAFT_93396|DAPPUDRAFT_93396|transcript|EFX71245.1|protein_coding||c.-74C>A|||||25|,T|upstream_gene_variant|MODIFIER|DAPPUDRAFT_228040|DAPPUDRAFT_228040|transcript|EFX71202.1|protein_coding||c.-3354G>T|||||3238|WARNING_TRANSCRIPT_NO_STOP_CODON,T|downstream_gene_variant|MODIFIER|DAPPUDRAFT_327383|DAPPUDRAFT_327383|transcript|EFX71201.1|protein_coding||c.*4300G>T…
388	C182	Nickel	Hom-Het	186	100206	GG	GT	Intergenic	116480	upstream_gene_variant													upstream_gene_variant|MODIFIER|DAPPUDRAFT_116480|DAPPUDRAFT_116480|transcript|EFX66345.1|protein_coding||c.-2919C>A|||||2919|,T|upstream_gene_variant|MODIFIER|DAPPUDRAFT_64792|DAPPUDRAFT_64792|transcript|EFX66336.1|protein_coding||c.-3234G>T|||||3234|,T|intron_variant|MODIFIER|DAPPUDRAFT_64785|DAPPUDRAFT_64785|transcript|EFX66344.1|protein_coding|3/4|c.579+114C>A||||||WARNING_TRANSCRIPT_NO_START_…
389	C182	Nickel	Hom-Het	2689	524	CC	CT	Intergenic	338859	upstream_gene_variant													upstream_gene_variant|MODIFIER|DAPPUDRAFT_338859|DAPPUDRAFT_338859|transcript|EFX61589.1|protein_coding||c.-716C>T|||||716|,T|intergenic_region|MODIFIER|CHR_START-DAPPUDRAFT_338859|CHR_START-DAPPUDRAFT_338859|intergenic_region|CHR_START-DAPPUDRAFT_338859|||n.525C>T||||||
390	C187	Nickel	Hom-Het	1	1130318	CC	TC	Intronic	232150	intron_variant													intron_variant|MODIFIER|DAPPUDRAFT_232150|DAPPUDRAFT_232150|transcript|EFX89940.1|protein_coding|4/6|c.281+11C>T||||||
391	C187	Nickel	Hom-Het	1	1844652	GG	GA	Intronic	190026	3_prime_UTR_variant													3_prime_UTR_variant|MODIFIER|DAPPUDRAFT_190026|DAPPUDRAFT_190026|transcript|EFX90003.1|protein_coding|8/8|c.*1355G>A|||||1355|,A|downstream_gene_variant|MODIFIER|DAPPUDRAFT_309707|DAPPUDRAFT_309707|transcript|EFX90002.1|protein_coding||c.*4176G>A|||||4176|,A|downstream_gene_variant|MODIFIER|DAPPUDRAFT_300068|DAPPUDRAFT_300068|transcript|EFX90353.1|protein_coding||c.*278C>T|||||278|,A|downstream_g…
392	C187	Nickel	Hom-Het	1	2751893	GG	GA	Intergenic	205349	upstream_gene_variant													upstream_gene_variant|MODIFIER|DAPPUDRAFT_205349|DAPPUDRAFT_205349|transcript|EFX90087.1|protein_coding||c.-1825G>A|||||618|,A|downstream_gene_variant|MODIFIER|DAPPUDRAFT_39669|DAPPUDRAFT_39669|transcript|EFX90263.1|protein_coding||c.*4966C>T|||||4966|,A|intergenic_region|MODIFIER|DAPPUDRAFT_299720-DAPPUDRAFT_205349|DAPPUDRAFT_299720-DAPPUDRAFT_205349|intergenic_region|DAPPUDRAFT_299720-DAPPUDRAF…
393	C187	Nickel	Hom-Het	3	823458	GG	AG	Intergenic	95363	upstream_gene_variant													upstream_gene_variant|MODIFIER|DAPPUDRAFT_95363|DAPPUDRAFT_95363|transcript|EFX89105.1|protein_coding||c.-4104C>T|||||4104|,A|downstream_gene_variant|MODIFIER|DAPPUDRAFT_233695|DAPPUDRAFT_233695|transcript|EFX88553.1|protein_coding||c.*2716G>A|||||2716|,A|downstream_gene_variant|MODIFIER|DAPPUDRAFT_95364|DAPPUDRAFT_95364|transcript|EFX89104.1|protein_coding||c.*470C>T|||||470|,A|intergenic_region…
394	C187	Nickel	Hom-Het	3	1592665	AA	TA	Intergenic	304699	upstream_gene_variant													upstream_gene_variant|MODIFIER|DAPPUDRAFT_304699|DAPPUDRAFT_304699|transcript|EFX89033.1|protein_coding||c.-4260T>A|||||2647|,T|upstream_gene_variant|MODIFIER|DAPPUDRAFT_206282|DAPPUDRAFT_206282|transcript|EFX89032.1|protein_coding||c.-1448T>A|||||1291|WARNING_TRANSCRIPT_NO_STOP_CODON,T|upstream_gene_variant|MODIFIER|DAPPUDRAFT_220814|DAPPUDRAFT_220814|transcript|EFX88621.1|protein_coding||c.-447…
395	C187	Nickel	Hom-Het	22	267253	GG	GA	Intergenic	242534	upstream_gene_variant													upstream_gene_variant|MODIFIER|DAPPUDRAFT_242534|DAPPUDRAFT_242534|transcript|EFX81093.1|protein_coding||c.-88G>A|||||88|,A|upstream_gene_variant|MODIFIER|DAPPUDRAFT_242535|DAPPUDRAFT_242535|transcript|EFX81094.1|protein_coding||c.-250G>A|||||250|,A|upstream_gene_variant|MODIFIER|DAPPUDRAFT_317759|DAPPUDRAFT_317759|transcript|EFX81095.1|protein_coding||c.-3092G>A|||||3092|,A|downstream_gene_varia…
396	C187	Nickel	Hom-Het	31	894293	AA	AT	Intergenic	245256	upstream_gene_variant													upstream_gene_variant|MODIFIER|DAPPUDRAFT_245256|DAPPUDRAFT_245256|transcript|EFX79218.1|protein_coding||c.-4076T>A|||||4076|,T|upstream_gene_variant|MODIFIER|DAPPUDRAFT_319806|DAPPUDRAFT_319806|transcript|EFX79217.1|protein_coding||c.-1154T>A|||||1154|,T|downstream_gene_variant|MODIFIER|DAPPUDRAFT_319807|DAPPUDRAFT_319807|transcript|EFX79163.1|protein_coding||c.*489A>T|||||489|,T|downstream_gene…
397	C187	Nickel	Hom-Het	40	732090	CC	TC	Intronic	305804	5_prime_UTR_variant													5_prime_UTR_variant|MODIFIER|DAPPUDRAFT_305804|DAPPUDRAFT_305804|transcript|EFX77536.1|protein_coding|1/1|c.-239G>A|||||239|,T|upstream_gene_variant|MODIFIER|LOPB5|DAPPUDRAFT_106095|transcript|EFX77473.1|protein_coding||c.-653C>T|||||653|,T|downstream_gene_variant|MODIFIER|LOPB4|DAPPUDRAFT_305803|transcript|EFX77472.1|protein_coding||c.*2470C>T|||||1636|
398	C187	Nickel	Hom-Het	42	653487	TT	TA	Intergenic	106354	downstream_gene_variant													downstream_gene_variant|MODIFIER|DAPPUDRAFT_106354|DAPPUDRAFT_106354|transcript|EFX77103.1|protein_coding||c.*285T>A|||||285|,A|intergenic_region|MODIFIER|DAPPUDRAFT_106354-DAPPUDRAFT_305909|DAPPUDRAFT_106354-DAPPUDRAFT_305909|intergenic_region|DAPPUDRAFT_106354-DAPPUDRAFT_305909|||n.653488T>A||||||
399	C187	Nickel	Hom-Het	44	186997	GG	AG	Intergenic	106655	downstream_gene_variant													downstream_gene_variant|MODIFIER|DAPPUDRAFT_106655|DAPPUDRAFT_106655|transcript|EFX76912.1|protein_coding||c.*2393C>T|||||2393|,A|intron_variant|MODIFIER|DAPPUDRAFT_321939|DAPPUDRAFT_321939|transcript|EFX76756.1|protein_coding|1/2|c.698-667G>A||||||
400	C187	Nickel	Hom-Het	56	786822	AA	GA	Intergenic	108312	upstream_gene_variant													upstream_gene_variant|MODIFIER|DAPPUDRAFT_108312|DAPPUDRAFT_108312|transcript|EFX75046.1|protein_coding||c.-1651A>G|||||1651|,G|intergenic_region|MODIFIER|DAPPUDRAFT_108311-DAPPUDRAFT_108312|DAPPUDRAFT_108311-DAPPUDRAFT_108312|intergenic_region|DAPPUDRAFT_108311-DAPPUDRAFT_108312|||n.786823A>G||||||
401	C187	Nickel	Hom-Het	62	562816	CC	TC	Intergenic	252091	upstream_gene_variant													upstream_gene_variant|MODIFIER|DAPPUDRAFT_252091|DAPPUDRAFT_252091|transcript|EFX74251.1|protein_coding||c.-2457C>T|||||2457|,T|downstream_gene_variant|MODIFIER|DAPPUDRAFT_307349|DAPPUDRAFT_307349|transcript|EFX74250.1|protein_coding||c.*4366C>T|||||4295|,T|intergenic_region|MODIFIER|DAPPUDRAFT_307349-DAPPUDRAFT_252091|DAPPUDRAFT_307349-DAPPUDRAFT_252091|intergenic_region|DAPPUDRAFT_307349-DAPPUD…
402	C187	Nickel	Hom-Het	87	307505	TT	TA	Intergenic	308852	upstream_gene_variant													upstream_gene_variant|MODIFIER|DAPPUDRAFT_308852|DAPPUDRAFT_308852|transcript|EFX71531.1|protein_coding||c.-1367A>T|||||1367|,A|upstream_gene_variant|MODIFIER|DAPPUDRAFT_308854|DAPPUDRAFT_308854|transcript|EFX71486.1|protein_coding||c.-4055T>A|||||3929|,A|downstream_gene_variant|MODIFIER|DAPPUDRAFT_308853|DAPPUDRAFT_308853|transcript|EFX71530.1|protein_coding||c.*703A>T|||||537|,A|intron_variant|…
403	C187	Nickel	Hom-Het	95	218111	CC	TC	Intergenic	TNC1	upstream_gene_variant													upstream_gene_variant|MODIFIER|TNC1|DAPPUDRAFT_442789|transcript|EFX70776.2|protein_coding||c.-653C>T|||||357|,T|downstream_gene_variant|MODIFIER|DAPPUDRAFT_256634|DAPPUDRAFT_256634|transcript|EFX70774.1|protein_coding||c.*3508C>T|||||3508|,T|downstream_gene_variant|MODIFIER|DAPPUDRAFT_33273|DAPPUDRAFT_33273|transcript|EFX70775.1|protein_coding||c.*1740C>T|||||1740|WARNING_TRANSCRIPT_NO_START_COD…
404	C187	Nickel	Hom-Het	118	34119	TT	TC	Exonic	301022	synonymous_variant													synonymous_variant|LOW|DAPPUDRAFT_301022|DAPPUDRAFT_301022|transcript|EFX69184.1|protein_coding|6/15|c.615T>C|p.Cys205Cys|615/2157|615/2157|205/718||,C|upstream_gene_variant|MODIFIER|DAPPUDRAFT_329313|DAPPUDRAFT_329313|transcript|EFX69242.1|protein_coding||c.-2832A>G|||||2832|,C|upstream_gene_variant|MODIFIER|DAPPUDRAFT_329314|DAPPUDRAFT_329314|transcript|EFX69241.1|protein_coding||c.-2122A>G||||…
405	C187	Nickel	Hom-Het	169	6296	CC	TC	Exonic	189566	stop_gained													stop_gained|HIGH|DAPPUDRAFT_189566|DAPPUDRAFT_189566|transcript|EFX66881.1|protein_coding|4/5|c.592C>T|p.Gln198*|592/2316|592/861|198/286||,T|upstream_gene_variant|MODIFIER|U1|EMDPUG00000001216|transcript|EMDPUT00000001216.1|snRNA||n.-4688G>A|||||4688|,T|upstream_gene_variant|MODIFIER|DAPPUDRAFT_299735|DAPPUDRAFT_299735|transcript|EFX66882.2|protein_coding||c.-3843C>T|||||3843|
406	C187	Nickel	Hom-Het	235	87582	GG	GT	Exonic	333419	missense_variant													missense_variant|MODERATE|DAPPUDRAFT_333419|DAPPUDRAFT_333419|transcript|EFX65220.1|protein_coding|1/4|c.220C>A|p.Gln74Lys|220/756|220/756|74/251||,T|downstream_gene_variant|MODIFIER|DAPPUDRAFT_65628|DAPPUDRAFT_65628|transcript|EFX65210.1|protein_coding||c.*1607G>T|||||1607|WARNING_TRANSCRIPT_NO_START_CODON,T|downstream_gene_variant|MODIFIER|DAPPUDRAFT_18001|DAPPUDRAFT_18001|transcript|EFX65211.1…
407	C251	Copper	Hom-Het	2	100599	AA	AT	Intergenic	310092	downstream_gene_variant													downstream_gene_variant|MODIFIER|DAPPUDRAFT_310092|DAPPUDRAFT_310092|transcript|EFX89192.1|protein_coding||c.*3383A>T|||||3383|,T|intron_variant|MODIFIER|DAPPUDRAFT_40603|DAPPUDRAFT_40603|transcript|EFX89193.1|protein_coding|3/4|c.678-20A>T||||||WARNING_TRANSCRIPT_NO_START_CODON
408	C251	Copper	Hom-Het	4	2182220	GG	GA	Exonic	191862	stop_gained													stop_gained|HIGH|DAPPUDRAFT_191862|DAPPUDRAFT_191862|transcript|EFX88063.1|protein_coding|3/4|c.134G>A|p.Trp45*|134/623|134/621|45/206||WARNING_TRANSCRIPT_NO_STOP_CODON,A|downstream_gene_variant|MODIFIER|DAPPUDRAFT_92028|DAPPUDRAFT_92028|transcript|EFX88062.1|protein_coding||c.*4448G>A|||||4327|,A|downstream_gene_variant|MODIFIER|DAPPUDRAFT_234781|DAPPUDRAFT_234781|transcript|EFX88280.1|protein_c…
409	C251	Copper	Hom-Het	8	1113590	CC	AC	Intronic	97999	intron_variant													intron_variant|MODIFIER|DAPPUDRAFT_97999|DAPPUDRAFT_97999|transcript|EFX86389.1|protein_coding|19/23|c.3472-154G>T||||||
410	C251	Copper	Hom-Het	14	440331	GG	GA	Intergenic	239568	upstream_gene_variant													upstream_gene_variant|MODIFIER|DAPPUDRAFT_239568|DAPPUDRAFT_239568|transcript|EFX83855.1|protein_coding||c.-772C>T|||||772|,A|intergenic_region|MODIFIER|DAPPUDRAFT_239568-DAPPUDRAFT_315400|DAPPUDRAFT_239568-DAPPUDRAFT_315400|intergenic_region|DAPPUDRAFT_239568-DAPPUDRAFT_315400|||n.440332G>A||||||
411	C251	Copper	Hom-Het	23	187366	GG	AG	Exonic	102782	stop_gained													stop_gained|HIGH|DAPPUDRAFT_102782|DAPPUDRAFT_102782|transcript|EFX81055.1|protein_coding|3/5|c.1960C>T|p.Gln654*|1960/3525|1960/3525|654/1174||,A|downstream_gene_variant|MODIFIER|DAPPUDRAFT_196379|DAPPUDRAFT_196379|transcript|EFX81054.1|protein_coding||c.*2513C>T|||||2513|
412	C251	Copper	Hom-Het	26	665728	TT	CT	Intronic	51584	splice_region_variant&intron_variant													splice_region_variant&intron_variant|LOW|DAPPUDRAFT_51584|DAPPUDRAFT_51584|transcript|EFX80266.1|protein_coding|3/13|c.773-6A>G||||||
413	C251	Copper	Hom-Het	42	289470	GG	GA	Intergenic	321665	upstream_gene_variant													upstream_gene_variant|MODIFIER|DAPPUDRAFT_321665|DAPPUDRAFT_321665|transcript|EFX77209.1|protein_coding||c.-3053C>T|||||3053|,A|upstream_gene_variant|MODIFIER|DAPPUDRAFT_248017|DAPPUDRAFT_248017|transcript|EFX77208.1|protein_coding||c.-726C>T|||||726|,A|upstream_gene_variant|MODIFIER|DAPPUDRAFT_54466|DAPPUDRAFT_54466|transcript|EFX77090.1|protein_coding||c.-2086G>A|||||2086|,A|downstream_gene_var…
414	C251	Copper	Hom-Het	115	69020	CC	CT	Exonic	329113	missense_variant													missense_variant|MODERATE|DAPPUDRAFT_329113|DAPPUDRAFT_329113|transcript|EFX69360.1|protein_coding|11/35|c.2378C>T|p.Ser793Leu|2378/8353|2378/8184|793/2727||,T|upstream_gene_variant|MODIFIER|DAPPUDRAFT_300962|DAPPUDRAFT_300962|transcript|EFX69428.1|protein_coding||c.-4690G>A|||||4546|
415	C251	Copper	Hom-Het	120	155604	TT	CT	Exonic	62579	missense_variant													missense_variant|MODERATE|DAPPUDRAFT_62579|DAPPUDRAFT_62579|transcript|EFX69136.1|protein_coding|3/5|c.473A>G|p.Asp158Gly|473/666|473/666|158/221||,C|upstream_gene_variant|MODIFIER|DAPPUDRAFT_113947|DAPPUDRAFT_113947|transcript|EFX69100.1|protein_coding||c.-1044T>C|||||1044|,C|downstream_gene_variant|MODIFIER|DAPPUDRAFT_329431|DAPPUDRAFT_329431|transcript|EFX69099.2|protein_coding||c.*605T>C|||||…
416	C251	Copper	Hom-Het	183	168626	CC	CT	Exonic	64710	missense_variant													missense_variant|MODERATE|DAPPUDRAFT_64710|DAPPUDRAFT_64710|transcript|EFX66425.1|protein_coding|1/2|c.169C>T|p.His57Tyr|169/1218|169/1218|57/405||,T|downstream_gene_variant|MODIFIER|DAPPUDRAFT_204061|DAPPUDRAFT_204061|transcript|EFX66431.1|protein_coding||c.*2210G>A|||||2210|,T|downstream_gene_variant|MODIFIER|DAPPUDRAFT_332232|DAPPUDRAFT_332232|transcript|EFX66430.1|protein_coding||c.*4805G>A||…
417	C251	Copper	Hom-Het	7105	999	TT	AT	Intergenic	-	intergenic_region													intergenic_region|MODIFIER|||||||||||||
418	C254	Copper	Hom-Het	1	4005089	GG	GA	Intronic	6	intron_variant													intron_variant|MODIFIER|DAPPUDRAFT_6|DAPPUDRAFT_6|transcript|EFX90172.1|protein_coding|1/14|c.1666-179G>A||||||WARNING_TRANSCRIPT_NO_START_CODON
419	C254	Copper	Hom-Het	3	2137820	TT	TG	Exonic	310960	missense_variant													missense_variant|MODERATE|DAPPUDRAFT_310960|DAPPUDRAFT_310960|transcript|EFX88982.1|protein_coding|4/4|c.339A>C|p.Lys113Asn|409/578|339/453|113/150||,G|upstream_gene_variant|MODIFIER|DAPPUDRAFT_310961|DAPPUDRAFT_310961|transcript|EFX88670.1|protein_coding||c.-2215T>G|||||2215|,G|upstream_gene_variant|MODIFIER|DAPPUDRAFT_310962|DAPPUDRAFT_310962|transcript|EFX88671.1|protein_coding||c.-3904T>G||||…
420	C254	Copper	Hom-Het	4	1773641	CC	CA	Exonic	311540	missense_variant													missense_variant|MODERATE|DAPPUDRAFT_311540|DAPPUDRAFT_311540|transcript|EFX88027.1|protein_coding|3/16|c.548C>A|p.Ser183Tyr|548/2945|548/2766|183/921||,A|upstream_gene_variant|MODIFIER|DAPPUDRAFT_42520|DAPPUDRAFT_42520|transcript|EFX88319.1|protein_coding||c.-1132G>T|||||1132|,A|upstream_gene_variant|MODIFIER|DAPPUDRAFT_96197|DAPPUDRAFT_96197|transcript|EFX88028.1|protein_coding||c.-4521C>A|||||…
421	C254	Copper	Hom-Het	5	764007	GG	CG	Intergenic	235137 / 13272	intergenic_region													intergenic_region|MODIFIER|DAPPUDRAFT_235137-DAPPUDRAFT_13272|DAPPUDRAFT_235137-DAPPUDRAFT_13272|intergenic_region|DAPPUDRAFT_235137-DAPPUDRAFT_13272|||n.764008G>C||||||
422	C254	Copper	Hom-Het	6	139921	TT	CT	Intergenic	96961	upstream_gene_variant													upstream_gene_variant|MODIFIER|DAPPUDRAFT_96961|DAPPUDRAFT_96961|transcript|EFX87455.1|protein_coding||c.-1050A>G|||||1050|,C|upstream_gene_variant|MODIFIER|DAPPUDRAFT_235552|DAPPUDRAFT_235552|transcript|EFX86846.1|protein_coding||c.-2322T>C|||||2322|,C|intergenic_region|MODIFIER|DAPPUDRAFT_96961-DAPPUDRAFT_235552|DAPPUDRAFT_96961-DAPPUDRAFT_235552|intergenic_region|DAPPUDRAFT_96961-DAPPUDRAFT_23…
423	C254	Copper	Hom-Het	7	24739	CC	CT	Exonic	312735	synonymous_variant													synonymous_variant|LOW|DAPPUDRAFT_312735|DAPPUDRAFT_312735|transcript|EFX86484.1|protein_coding|1/10|c.228C>T|p.Asp76Asp|228/1513|228/1386|76/461||,T|upstream_gene_variant|MODIFIER|DAPPUDRAFT_312736|DAPPUDRAFT_312736|transcript|EFX86485.1|protein_coding||c.-2627C>T|||||2627|,T|downstream_gene_variant|MODIFIER|DAPPUDRAFT_236145|DAPPUDRAFT_236145|transcript|EFX86483.1|protein_coding||c.*1587C>T||||…
424	C254	Copper	Hom-Het	8	917987	CC	TC	Intergenic	236786	upstream_gene_variant													upstream_gene_variant|MODIFIER|DAPPUDRAFT_236786|DAPPUDRAFT_236786|transcript|EFX86401.1|protein_coding||c.-739G>A|||||739|,T|upstream_gene_variant|MODIFIER|DAPPUDRAFT_313175|DAPPUDRAFT_313175|transcript|EFX86145.1|protein_coding||c.-700C>T|||||700|,T|downstream_gene_variant|MODIFIER|DAPPUDRAFT_313174|DAPPUDRAFT_313174|transcript|EFX86144.1|protein_coding||c.*3889C>T|||||3571|,T|intergenic_region…
425	C254	Copper	Hom-Het	12	2059239	CC	CT	Intergenic	314918	upstream_gene_variant													upstream_gene_variant|MODIFIER|DAPPUDRAFT_314918|DAPPUDRAFT_314918|transcript|EFX84584.1|protein_coding||c.-3467G>A|||||3467|,T|downstream_gene_variant|MODIFIER|DAPPUDRAFT_314917|DAPPUDRAFT_314917|transcript|EFX84560.1|protein_coding||c.*4075C>T|||||4075|,T|intergenic_region|MODIFIER|DAPPUDRAFT_314918-DAPPUDRAFT_47091|DAPPUDRAFT_314918-DAPPUDRAFT_47091|intergenic_region|DAPPUDRAFT_314918-DAPPUDRA…
426	C254	Copper	Hom-Het	39	877856	CC	TC	Intergenic	305359	upstream_gene_variant													upstream_gene_variant|MODIFIER|DAPPUDRAFT_305359|DAPPUDRAFT_305359|transcript|EFX77707.1|protein_coding||c.-999G>A|||||822|,T|upstream_gene_variant|MODIFIER|DAPPUDRAFT_105940|DAPPUDRAFT_105940|transcript|EFX77678.1|protein_coding||c.-3171C>T|||||3171|,T|intron_variant|MODIFIER|DAPPUDRAFT_321206|DAPPUDRAFT_321206|transcript|EFX77677.1|protein_coding|3/3|c.556-37C>T||||||
427	C254	Copper	Hom-Het	41	401028	GG	GA	Intergenic	247793	downstream_gene_variant													downstream_gene_variant|MODIFIER|DAPPUDRAFT_247793|DAPPUDRAFT_247793|transcript|EFX77260.1|protein_coding||c.*1801G>A|||||1801|,A|downstream_gene_variant|MODIFIER|DAPPUDRAFT_247794|DAPPUDRAFT_247794|transcript|EFX77261.1|protein_coding||c.*1454G>A|||||1454|,A|downstream_gene_variant|MODIFIER|DAPPUDRAFT_106201|DAPPUDRAFT_106201|transcript|EFX77376.1|protein_coding||c.*507C>T|||||507|,A|intergenic_…
428	C254	Copper	Hom-Het	43	606305	CC	AC	Intronic	306022	3_prime_UTR_variant													3_prime_UTR_variant|MODIFIER|DAPPUDRAFT_306022|DAPPUDRAFT_306022|transcript|EFX76973.1|protein_coding|12/12|c.*180C>A|||||180|,A|upstream_gene_variant|MODIFIER|DAPPUDRAFT_321858|DAPPUDRAFT_321858|transcript|EFX76974.1|protein_coding||c.-4397C>A|||||4397|
429	C254	Copper	Hom-Het	45	884131	TT	AT	Exonic	106895	missense_variant													missense_variant|MODERATE|DAPPUDRAFT_106895|DAPPUDRAFT_106895|transcript|EFX76633.1|protein_coding|3/7|c.393A>T|p.Gln131His|393/1047|393/1047|131/348||
430	C254	Copper	Hom-Het	50	166007	AA	AC	Intergenic	249713	downstream_gene_variant													downstream_gene_variant|MODIFIER|DAPPUDRAFT_249713|DAPPUDRAFT_249713|transcript|EFX75815.1|protein_coding||c.*3370A>C|||||3370|,C|intron_variant|MODIFIER|DAPPUDRAFT_322865|DAPPUDRAFT_322865|transcript|EFX75816.1|protein_coding|3/4|c.257-1196A>C||||||
431	C254	Copper	Hom-Het	72	320256	GG	TG	Exonic	32116	missense_variant													missense_variant|MODERATE|DAPPUDRAFT_32116|DAPPUDRAFT_32116|transcript|EFX73024.1|protein_coding|1/6|c.110C>A|p.Pro37His|110/555|110/555|37/184||WARNING_TRANSCRIPT_NO_START_CODON,T|upstream_gene_variant|MODIFIER|DAPPUDRAFT_200640|DAPPUDRAFT_200640|transcript|EFX72928.1|protein_coding||c.-3785G>T|||||3656|
432	C254	Copper	Hom-Het	98	281519	GG	AG	Exonic	328060	synonymous_variant													synonymous_variant|LOW|DAPPUDRAFT_328060|DAPPUDRAFT_328060|transcript|EFX70505.1|protein_coding|7/10|c.1239G>A|p.Arg413Arg|1239/1875|1239/1875|413/624||,A|upstream_gene_variant|MODIFIER|DAPPUDRAFT_309414|DAPPUDRAFT_309414|transcript|EFX70506.1|protein_coding||c.-907G>A|||||907|,A|downstream_gene_variant|MODIFIER|DAPPUDRAFT_256995|DAPPUDRAFT_256995|transcript|EFX70504.1|protein_coding||c.*2854G>A|…
433	C254	Copper	Hom-Het	100	411506	CC	CT	Intergenic	257272	upstream_gene_variant													upstream_gene_variant|MODIFIER|DAPPUDRAFT_257272|DAPPUDRAFT_257272|transcript|EFX70318.1|protein_coding||c.-4210C>T|||||4210|,T|intron_variant|MODIFIER|DAPPUDRAFT_328200|DAPPUDRAFT_328200|transcript|EFX70330.1|protein_coding|5/6|c.2404+660G>A||||||
434	C254	Copper	Hom-Het	202	124631	TT	TC	Intergenic	263980	upstream_gene_variant													upstream_gene_variant|MODIFIER|DAPPUDRAFT_263980|DAPPUDRAFT_263980|transcript|EFX65937.1|protein_coding||c.-813T>C|||||813|,C|upstream_gene_variant|MODIFIER|DAPPUDRAFT_263981|DAPPUDRAFT_263981|transcript|EFX65938.1|protein_coding||c.-3054T>C|||||3054|,C|intergenic_region|MODIFIER|DAPPUDRAFT_116846-DAPPUDRAFT_263980|DAPPUDRAFT_116846-DAPPUDRAFT_263980|intergenic_region|DAPPUDRAFT_116846-DAPPUDRAFT…
435	C254	Copper	Hom-Het	247	35152	GG	GA	Exonic	265349	synonymous_variant													synonymous_variant|LOW|DAPPUDRAFT_265349|DAPPUDRAFT_265349|transcript|EFX65021.1|protein_coding|3/5|c.99G>A|p.Lys33Lys|99/306|99/306|33/101||,A|upstream_gene_variant|MODIFIER|DAPPUDRAFT_265351|DAPPUDRAFT_265351|transcript|EFX65022.1|protein_coding||c.-3515G>A|||||3515|,A|downstream_gene_variant|MODIFIER|DAPPUDRAFT_117621|DAPPUDRAFT_117621|transcript|EFX65020.1|protein_coding||c.*3510G>A|||||3510|…
436	C256	Copper	Hom-Het	1	2681875	GG	GA	Intronic	232495	intron_variant													intron_variant|MODIFIER|DAPPUDRAFT_232495|DAPPUDRAFT_232495|transcript|EFX90084.1|protein_coding|2/17|c.58-2731G>A||||||
437	C256	Copper	Hom-Het	9	615720	CC	CT	Intergenic	DOP-R	upstream_gene_variant													upstream_gene_variant|MODIFIER|DOP-R|DAPPUDRAFT_45558|transcript|EFX85744.1|protein_coding||c.-4205C>T|||||4205|,T|intergenic_region|MODIFIER|DAPPUDRAFT_313504-DOP-R|DAPPUDRAFT_313504-DAPPUDRAFT_45558|intergenic_region|DAPPUDRAFT_313504-DAPPUDRAFT_45558|||n.615721C>T||||||
438	C256	Copper	Hom-Het	13	1818006	CC	CT	Exonic	301367	missense_variant													missense_variant|MODERATE|DAPPUDRAFT_301367|DAPPUDRAFT_301367|transcript|EFX84102.1|protein_coding|1/1|c.44C>T|p.Ser15Leu|68/832|44/363|15/120||,T|upstream_gene_variant|MODIFIER|DAPPUDRAFT_301396|DAPPUDRAFT_301396|transcript|EFX84123.1|protein_coding||c.-830G>A|||||830|,T|downstream_gene_variant|MODIFIER|DAPPUDRAFT_5968|DAPPUDRAFT_5968|transcript|EFX84122.1|protein_coding||c.*2306G>A|||||2306|WAR…
439	C256	Copper	Hom-Het	15	543889	CC	CT	Intergenic	240035 / 48053	intergenic_region													intergenic_region|MODIFIER|DAPPUDRAFT_240035-DAPPUDRAFT_48053|DAPPUDRAFT_240035-DAPPUDRAFT_48053|intergenic_region|DAPPUDRAFT_240035-DAPPUDRAFT_48053|||n.543890C>T||||||
440	C256	Copper	Hom-Het	19	1077694	GG	GA	Exonic	101964	missense_variant													missense_variant|MODERATE|DAPPUDRAFT_101964|DAPPUDRAFT_101964|transcript|EFX81986.1|protein_coding|5/5|c.1040C>T|p.Ala347Val|1040/1080|1040/1080|347/359||,A|upstream_gene_variant|MODIFIER|DAPPUDRAFT_317120|DAPPUDRAFT_317120|transcript|EFX81990.1|protein_coding||c.-4577C>T|||||4577|,A|upstream_gene_variant|MODIFIER|DAPPUDRAFT_241744|DAPPUDRAFT_241744|transcript|EFX81989.1|protein_coding||c.-3473C>…
441	C256	Copper	Hom-Het	26	250519	TT	TG	Intergenic	318730	downstream_gene_variant													downstream_gene_variant|MODIFIER|DAPPUDRAFT_318730|DAPPUDRAFT_318730|transcript|EFX80301.1|protein_coding||c.*4935A>C|||||4935|,G|intergenic_region|MODIFIER|KLF2B-DAPPUDRAFT_318730|DAPPUDRAFT_243802-DAPPUDRAFT_318730|intergenic_region|DAPPUDRAFT_243802-DAPPUDRAFT_318730|||n.250520T>G||||||
442	C256	Copper	Hom-Het	41	455297	AA	AG	Intergenic	247805	upstream_gene_variant													upstream_gene_variant|MODIFIER|DAPPUDRAFT_247805|DAPPUDRAFT_247805|transcript|EFX77372.1|protein_coding||c.-4522T>C|||||4522|,G|intergenic_region|MODIFIER|DAPPUDRAFT_247805-DAPPUDRAFT_305830|DAPPUDRAFT_247805-DAPPUDRAFT_305830|intergenic_region|DAPPUDRAFT_247805-DAPPUDRAFT_305830|||n.455298A>G||||||
443	C256	Copper	Hom-Het	41	521295	GG	CG	Intergenic	247819	upstream_gene_variant													upstream_gene_variant|MODIFIER|DAPPUDRAFT_247819|DAPPUDRAFT_247819|transcript|EFX77271.1|protein_coding||c.-1820G>C|||||1820|,C|downstream_gene_variant|MODIFIER|DAPPUDRAFT_321531|DAPPUDRAFT_321531|transcript|EFX77268.1|protein_coding||c.*4112G>C|||||4112|,C|downstream_gene_variant|MODIFIER|DAPPUDRAFT_321532|DAPPUDRAFT_321532|transcript|EFX77269.1|protein_coding||c.*3704G>C|||||3704|,C|downstream_…
444	C256	Copper	Hom-Het	46	299236	CC	TC	Exonic	198891	synonymous_variant													synonymous_variant|LOW|DAPPUDRAFT_198891|DAPPUDRAFT_198891|transcript|EFX76526.1|protein_coding|2/5|c.222G>A|p.Lys74Lys|365/968|222/825|74/274||,T|upstream_gene_variant|MODIFIER|DAPPUDRAFT_26393|DAPPUDRAFT_26393|transcript|EFX76527.1|protein_coding||c.-1964G>A|||||1964|WARNING_TRANSCRIPT_NO_START_CODON,T|upstream_gene_variant|MODIFIER|DAPPUDRAFT_322302|DAPPUDRAFT_322302|transcript|EFX76420.1|prot…
445	C256	Copper	Hom-Het	53	769772	GG	CG	Intergenic	129039	upstream_gene_variant													upstream_gene_variant|MODIFIER|DAPPUDRAFT_129039|DAPPUDRAFT_129039|transcript|EFX75451.1|protein_coding||c.-4215C>G|||||4215|,C|downstream_gene_variant|MODIFIER|DAPPUDRAFT_306816|DAPPUDRAFT_306816|transcript|EFX75438.1|protein_coding||c.*1455G>C|||||1229|,C|downstream_gene_variant|MODIFIER|DAPPUDRAFT_107963|DAPPUDRAFT_107963|transcript|EFX75450.1|protein_coding||c.*111C>G|||||111|,C|intergenic_re…
446	C256	Copper	Hom-Het	68	183338	CC	TC	Intergenic	253057	upstream_gene_variant													upstream_gene_variant|MODIFIER|DAPPUDRAFT_253057|DAPPUDRAFT_253057|transcript|EFX73507.1|protein_coding||c.-983G>A|||||983|,T|upstream_gene_variant|MODIFIER|DAPPUDRAFT_109754|DAPPUDRAFT_109754|transcript|EFX73443.1|protein_coding||c.-3103C>T|||||3103|,T|intergenic_region|MODIFIER|DAPPUDRAFT_253057-DAPPUDRAFT_109754|DAPPUDRAFT_253057-DAPPUDRAFT_109754|intergenic_region|DAPPUDRAFT_253057-DAPPUDRAFT…
447	C256	Copper	Hom-Het	69	547045	CC	CT	Intergenic	58076 / 325355	intergenic_region													intergenic_region|MODIFIER|DAPPUDRAFT_58076-DAPPUDRAFT_325355|DAPPUDRAFT_58076-DAPPUDRAFT_325355|intergenic_region|DAPPUDRAFT_58076-DAPPUDRAFT_325355|||n.547046C>T||||||
448	C256	Copper	Hom-Het	88	379783	TT	TC	Exonic	327247	missense_variant													missense_variant|MODERATE|DAPPUDRAFT_327247|DAPPUDRAFT_327247|transcript|EFX71379.1|protein_coding|3/4|c.254T>C|p.Met85Thr|254/564|254/564|85/187||,C|upstream_gene_variant|MODIFIER|DAPPUDRAFT_327246|DAPPUDRAFT_327246|transcript|EFX71405.1|protein_coding||c.-1154A>G|||||1098|,C|downstream_gene_variant|MODIFIER|DAPPUDRAFT_129719|DAPPUDRAFT_129719|transcript|EFX71378.1|protein_coding||c.*4137T>C||||…
449	C256	Copper	Hom-Het	122	294282	TT	TA	Intergenic	114097	upstream_gene_variant													upstream_gene_variant|MODIFIER|DAPPUDRAFT_114097|DAPPUDRAFT_114097|transcript|EFX68987.1|protein_coding||c.-822A>T|||||822|,A|upstream_gene_variant|MODIFIER|DAPPUDRAFT_114098|DAPPUDRAFT_114098|transcript|EFX68976.1|protein_coding||c.-2259T>A|||||2259|,A|intergenic_region|MODIFIER|DAPPUDRAFT_114097-DAPPUDRAFT_114098|DAPPUDRAFT_114097-DAPPUDRAFT_114098|intergenic_region|DAPPUDRAFT_114097-DAPPUDRAFT…
450	C256	Copper	Hom-Het	134	71741	CC	CT	Intergenic	330126	upstream_gene_variant													upstream_gene_variant|MODIFIER|DAPPUDRAFT_330126|DAPPUDRAFT_330126|transcript|EFX68381.1|protein_coding||c.-3439C>T|||||3439|,T|intergenic_region|MODIFIER|DAPPUDRAFT_330125-DAPPUDRAFT_330126|DAPPUDRAFT_330125-DAPPUDRAFT_330126|intergenic_region|DAPPUDRAFT_330125-DAPPUDRAFT_330126|||n.71742C>T||||||
451	C256	Copper	Hom-Het	207	102975	AA	TA	Intronic	HHG	intron_variant													intron_variant|MODIFIER|HHG|DAPPUDRAFT_290571|transcript|EFX65836.1|protein_coding|2/2|c.830-1709A>T||||||
452	C280	Copper	Hom-Het	2	3619159	GG	GA	Intronic	233506	intron_variant													intron_variant|MODIFIER|DAPPUDRAFT_233506|DAPPUDRAFT_233506|transcript|EFX89517.1|protein_coding|4/7|c.207+491C>T||||||
453	C280	Copper	Hom-Het	3	1069909	AA	AG	Intergenic	15798	downstream_gene_variant													downstream_gene_variant|MODIFIER|DAPPUDRAFT_15798|DAPPUDRAFT_15798|transcript|EFX88573.1|protein_coding||c.*400A>G|||||400|WARNING_TRANSCRIPT_NO_START_CODON,G|intron_variant|MODIFIER|DAPPUDRAFT_233738|DAPPUDRAFT_233738|transcript|EFX89090.1|protein_coding|3/3|c.228-88T>C||||||
454	C280	Copper	Hom-Het	4	2193183	GG	GA	Exonic	DpuGr8	missense_variant													missense_variant|MODERATE|DpuGr8|DAPPUDRAFT_311619|transcript|EFX88066.1|protein_coding|1/5|c.452G>A|p.Gly151Glu|452/1227|452/1227|151/408||,A|upstream_gene_variant|MODIFIER|DAPPUDRAFT_234781|DAPPUDRAFT_234781|transcript|EFX88280.1|protein_coding||c.-4849C>T|||||4849|,A|upstream_gene_variant|MODIFIER|DPUGR9|DAPPUDRAFT_346838|transcript|EFX88067.2|protein_coding||c.-1462G>A|||||1462|,A|downstream_…
455	C280	Copper	Hom-Het	18	176476	GG	GA	Exonic	28152	missense_variant													missense_variant|MODERATE|DAPPUDRAFT_28152|DAPPUDRAFT_28152|transcript|EFX82475.1|protein_coding|1/2|c.121C>T|p.His41Tyr|121/228|121/228|41/75||WARNING_TRANSCRIPT_NO_START_CODON,A|upstream_gene_variant|MODIFIER|DAPPUDRAFT_241133|DAPPUDRAFT_241133|transcript|EFX82476.1|protein_coding||c.-3479C>T|||||3479|,A|upstream_gene_variant|MODIFIER|DAPPUDRAFT_316623|DAPPUDRAFT_316623|transcript|EFX82082.1|pr…
456	C280	Copper	Hom-Het	21	1393901	GG	AG	Intergenic	26394	upstream_gene_variant													upstream_gene_variant|MODIFIER|DAPPUDRAFT_26394|DAPPUDRAFT_26394|transcript|EFX81444.1|protein_coding||c.-3577C>T|||||3577|WARNING_TRANSCRIPT_NO_START_CODON,A|upstream_gene_variant|MODIFIER|DAPPUDRAFT_50300|DAPPUDRAFT_50300|transcript|EFX81443.1|protein_coding||c.-1736C>T|||||1736|,A|downstream_gene_variant|MODIFIER|DAPPUDRAFT_50257|DAPPUDRAFT_50257|transcript|EFX81442.1|protein_coding||c.*1104C>…
457	C280	Copper	Hom-Het	36	614784	GG	AG	Intergenic	246515	upstream_gene_variant													upstream_gene_variant|MODIFIER|DAPPUDRAFT_246515|DAPPUDRAFT_246515|transcript|EFX78289.1|protein_coding||c.-4053C>T|||||4053|,A|upstream_gene_variant|MODIFIER|DAPPUDRAFT_246517|DAPPUDRAFT_246517|transcript|EFX78288.1|protein_coding||c.-600C>T|||||600|,A|downstream_gene_variant|MODIFIER|DAPPUDRAFT_246516|DAPPUDRAFT_246516|transcript|EFX78154.1|protein_coding||c.*1294G>A|||||1294|,A|downstream_gene…
458	C280	Copper	Hom-Het	38	421754	CC	CT	Intergenic	105734	upstream_gene_variant													upstream_gene_variant|MODIFIER|DAPPUDRAFT_105734|DAPPUDRAFT_105734|transcript|EFX77887.1|protein_coding||c.-3078G>A|||||3078|,T|upstream_gene_variant|MODIFIER|DAPPUDRAFT_105735|DAPPUDRAFT_105735|transcript|EFX77886.1|protein_coding||c.-1076G>A|||||1076|,T|intergenic_region|MODIFIER|DAPPUDRAFT_105735-DAPPUDRAFT_320995|DAPPUDRAFT_105735-DAPPUDRAFT_320995|intergenic_region|DAPPUDRAFT_105735-DAPPUDRA…
459	C280	Copper	Hom-Het	44	818712	TT	AT	Exonic	54893	missense_variant													missense_variant|MODERATE|DAPPUDRAFT_54893|DAPPUDRAFT_54893|transcript|EFX76851.1|protein_coding|9/10|c.1178A>T|p.His393Leu|1178/1302|1178/1302|393/433||,A|upstream_gene_variant|MODIFIER|DAPPUDRAFT_54889|DAPPUDRAFT_54889|transcript|EFX76852.1|protein_coding||c.-4815A>T|||||4815|WARNING_TRANSCRIPT_NO_START_CODON
460	C280	Copper	Hom-Het	56	236309	GG	AG	Intronic	323722	intron_variant													intron_variant|MODIFIER|DAPPUDRAFT_323722|DAPPUDRAFT_323722|transcript|EFX75014.1|protein_coding|1/6|c.86+897G>A||||||
461	C280	Copper	Hom-Het	68	512068	AA	CA	Exonic	307700	stop_gained													stop_gained|HIGH|DAPPUDRAFT_307700|DAPPUDRAFT_307700|transcript|EFX73484.1|protein_coding|6/18|c.659T>G|p.Leu220*|685/2699|659/2673|220/890||
462	C280	Copper	Hom-Het	138	118689	GG	GA	Intronic	63312	intron_variant													intron_variant|MODIFIER|DAPPUDRAFT_63312|DAPPUDRAFT_63312|transcript|EFX68222.1|protein_coding|5/14|c.478-4658C>T||||||WARNING_TRANSCRIPT_NO_START_CODON
463	C280	Copper	Hom-Het	190	102561	GG	GA	Intronic	263488	intron_variant													intron_variant|MODIFIER|DAPPUDRAFT_263488|DAPPUDRAFT_263488|transcript|EFX66222.1|protein_coding|6/19|c.1095-170G>A||||||
464	C280	Copper	Hom-Het	812	5354	GG	AG	Intronic	219748	intron_variant													intron_variant|MODIFIER|DAPPUDRAFT_219748|DAPPUDRAFT_219748|transcript|EFX63064.1|protein_coding|3/11|c.324-2201G>A||||||
465	C280	Copper	Hom-Het	812	5356	GG	AG	Intronic	219748	intron_variant													intron_variant|MODIFIER|DAPPUDRAFT_219748|DAPPUDRAFT_219748|transcript|EFX63064.1|protein_coding|3/11|c.324-2199G>A||||||
466	C281	Copper	Hom-Het	6	606036	GG	GT	Exonic	312327	missense_variant													missense_variant|MODERATE|DAPPUDRAFT_312327|DAPPUDRAFT_312327|transcript|EFX87402.1|protein_coding|2/5|c.120C>A|p.His40Gln|120/651|120/651|40/216||,T|upstream_gene_variant|MODIFIER|DAPPUDRAFT_307061|DAPPUDRAFT_307061|transcript|EFX87404.1|protein_coding||c.-4205C>A|||||4107|,T|upstream_gene_variant|MODIFIER|DAPPUDRAFT_312326|DAPPUDRAFT_312326|transcript|EFX87403.1|protein_coding||c.-1904C>A|||||1…
467	C281	Copper	Hom-Het	7	1096300	GG	GA	Intergenic	97606 / 44312	intergenic_region													intergenic_region|MODIFIER|DAPPUDRAFT_97606-DAPPUDRAFT_44312|DAPPUDRAFT_97606-DAPPUDRAFT_44312|intergenic_region|DAPPUDRAFT_97606-DAPPUDRAFT_44312|||n.1096301G>A||||||
468	C281	Copper	Hom-Het	14	768793	CC	TC	Intronic	ARTHROPSIN2	intron_variant													intron_variant|MODIFIER|ARTHROPSIN2|DAPPUDRAFT_346939|transcript|EFX83618.2|protein_coding|2/3|c.374-185C>T||||||
469	C281	Copper	Hom-Het	17	1103483	GG	AG	Exonic	302380	synonymous_variant													synonymous_variant|LOW|DAPPUDRAFT_302380|DAPPUDRAFT_302380|transcript|EFX82770.1|protein_coding|1/10|c.138C>T|p.Phe46Phe|138/1929|138/1821|46/606||,A|upstream_gene_variant|MODIFIER|DAPPUDRAFT_4284|DAPPUDRAFT_4284|transcript|EFX82654.1|protein_coding||c.-2924G>A|||||2924|WARNING_TRANSCRIPT_NO_START_CODON,A|downstream_gene_variant|MODIFIER|DAPPUDRAFT_302379|DAPPUDRAFT_302379|transcript|EFX82653.1|p…
470	C281	Copper	Hom-Het	21	607851	GG	GA	Intergenic	50312	downstream_gene_variant													downstream_gene_variant|MODIFIER|DAPPUDRAFT_50312|DAPPUDRAFT_50312|transcript|EFX81375.1|protein_coding||c.*4626G>A|||||4626|WARNING_TRANSCRIPT_NO_START_CODON,A|downstream_gene_variant|MODIFIER|DAPPUDRAFT_33294|DAPPUDRAFT_33294|transcript|EFX81376.1|protein_coding||c.*3070G>A|||||3070|WARNING_TRANSCRIPT_NO_START_CODON,A|downstream_gene_variant|MODIFIER|DAPPUDRAFT_242304|DAPPUDRAFT_242304|transcri…
471	C281	Copper	Hom-Het	34	810168	CC	AC	Intronic	320285	intron_variant													intron_variant|MODIFIER|DAPPUDRAFT_320285|DAPPUDRAFT_320285|transcript|EFX78633.1|protein_coding|9/11|c.669+556C>A||||||
472	C281	Copper	Hom-Het	45	627252	CC	CT	Intergenic	106864	upstream_gene_variant													upstream_gene_variant|MODIFIER|DAPPUDRAFT_106864|DAPPUDRAFT_106864|transcript|EFX76659.1|protein_coding||c.-635G>A|||||635|,T|upstream_gene_variant|MODIFIER|DAPPUDRAFT_322193|DAPPUDRAFT_322193|transcript|EFX76615.1|protein_coding||c.-1828C>T|||||1828|,T|upstream_gene_variant|MODIFIER|DAPPUDRAFT_322194|DAPPUDRAFT_322194|transcript|EFX76616.1|protein_coding||c.-2922C>T|||||2922|,T|upstream_gene_var…
473	C281	Copper	Hom-Het	56	667826	CC	CA	Intergenic	251092	upstream_gene_variant													upstream_gene_variant|MODIFIER|DAPPUDRAFT_251092|DAPPUDRAFT_251092|transcript|EFX75038.1|protein_coding||c.-645C>A|||||645|,A|upstream_gene_variant|MODIFIER|DAPPUDRAFT_251093|DAPPUDRAFT_251093|transcript|EFX75039.1|protein_coding||c.-3611C>A|||||3611|,A|intergenic_region|MODIFIER|DAPPUDRAFT_108299-DAPPUDRAFT_251092|DAPPUDRAFT_108299-DAPPUDRAFT_251092|intergenic_region|DAPPUDRAFT_108299-DAPPUDRAFT…
474	C281	Copper	Hom-Het	70	432304	CC	AC	Intergenic	325475	downstream_gene_variant													downstream_gene_variant|MODIFIER|DAPPUDRAFT_325475|DAPPUDRAFT_325475|transcript|EFX73206.1|protein_coding||c.*4517C>A|||||4123|,A|downstream_gene_variant|MODIFIER|DAPPUDRAFT_129381|DAPPUDRAFT_129381|transcript|EFX73207.1|protein_coding||c.*1407C>A|||||1407|,A|downstream_gene_variant|MODIFIER|DAPPUDRAFT_253444|DAPPUDRAFT_253444|transcript|EFX73292.1|protein_coding||c.*4869G>T|||||4869|,A|intron_va…
475	C281	Copper	Hom-Het	79	585359	CC	TC	Intergenic	254757	upstream_gene_variant													upstream_gene_variant|MODIFIER|DAPPUDRAFT_254757|DAPPUDRAFT_254757|transcript|EFX72243.1|protein_coding||c.-4106G>A|||||4106|,T|upstream_gene_variant|MODIFIER|DAPPUDRAFT_326465|DAPPUDRAFT_326465|transcript|EFX72242.1|protein_coding||c.-1700C>T|||||1700|,T|downstream_gene_variant|MODIFIER|DAPPUDRAFT_326464|DAPPUDRAFT_326464|transcript|EFX72241.1|protein_coding||c.*1621C>T|||||448|,T|intergenic_reg…
476	C281	Copper	Hom-Het	113	271237	CC	TC	Exonic	329028	missense_variant													missense_variant|MODERATE|DAPPUDRAFT_329028|DAPPUDRAFT_329028|transcript|EFX69538.1|protein_coding|21/21|c.4762G>A|p.Ala1588Thr|4762/4794|4762/4794|1588/1597||,T|upstream_gene_variant|MODIFIER|DAPPUDRAFT_258461|DAPPUDRAFT_258461|transcript|EFX69539.1|protein_coding||c.-2771G>A|||||2771|
477	C281	Copper	Hom-Het	118	52885	GG	GA	Intergenic	329324	upstream_gene_variant													upstream_gene_variant|MODIFIER|DAPPUDRAFT_329324|DAPPUDRAFT_329324|transcript|EFX69185.1|protein_coding||c.-799G>A|||||799|,A|intergenic_region|MODIFIER|DAPPUDRAFT_16724-DAPPUDRAFT_329324|DAPPUDRAFT_16724-DAPPUDRAFT_329324|intergenic_region|DAPPUDRAFT_16724-DAPPUDRAFT_329324|||n.52886G>A||||||
478	C281	Copper	Hom-Het	144	67774	CC	TC	Exonic	115038	synonymous_variant													synonymous_variant|LOW|DAPPUDRAFT_115038|DAPPUDRAFT_115038|transcript|EFX67907.1|protein_coding|2/2|c.423C>T|p.Phe141Phe|423/465|423/465|141/154||
479	C281	Copper	Hom-Het	145	40500	CC	CT	Exonic	301777	missense_variant													missense_variant|MODERATE|DAPPUDRAFT_301777|DAPPUDRAFT_301777|transcript|EFX67820.1|protein_coding|1/3|c.53C>T|p.Ser18Leu|340/1183|53/822|18/273||,T|downstream_gene_variant|MODIFIER|DAPPUDRAFT_330622|DAPPUDRAFT_330622|transcript|EFX67818.1|protein_coding||c.*4094C>T|||||4094|,T|downstream_gene_variant|MODIFIER|DAPPUDRAFT_63609|DAPPUDRAFT_63609|transcript|EFX67819.1|protein_coding||c.*2649C>T|||||…
480	C281	Copper	Hom-Het	186	117264	CC	CT	Intergenic	64792 / 18657	intergenic_region													intergenic_region|MODIFIER|DAPPUDRAFT_64792-DAPPUDRAFT_18657|DAPPUDRAFT_64792-DAPPUDRAFT_18657|intergenic_region|DAPPUDRAFT_64792-DAPPUDRAFT_18657|||n.117265C>T||||||
481	C281	Copper	Hom-Het	307	46956	GG	TG	Intergenic	304899	upstream_gene_variant													upstream_gene_variant|MODIFIER|DAPPUDRAFT_304899|DAPPUDRAFT_304899|transcript|EFX64474.1|protein_coding||c.-882C>A|||||882|,T|upstream_gene_variant|MODIFIER|tRNA-Trp|EMDPUG00000003818|transcript|EMDPUT00000003818.1|protein_coding||c.-1010G>T|||||1010|WARNING_TRANSCRIPT_MULTIPLE_STOP_CODONS,T|intergenic_region|MODIFIER|DAPPUDRAFT_304899-tRNA-Trp|DAPPUDRAFT_304899-EMDPUG00000003818|intergenic_regio…
482	C284	Copper	Hom-Het	2	1848661	GG	TG	Intergenic	ZFH3 / 94899	intergenic_region													intergenic_region|MODIFIER|DAPPUDRAFT_94899-ZFH3|DAPPUDRAFT_94899-DAPPUDRAFT_233159|intergenic_region|DAPPUDRAFT_94899-DAPPUDRAFT_233159|||n.1848662G>T||||||
483	C284	Copper	Hom-Het	3	2152728	CC	AC	Intronic	206384	intron_variant													intron_variant|MODIFIER|DAPPUDRAFT_206384|DAPPUDRAFT_206384|transcript|EFX88672.1|protein_coding|13/29|c.4039-102C>A||||||
484	C284	Copper	Hom-Het	5	1181146	CC	CT	Intergenic	306526	upstream_gene_variant													upstream_gene_variant|MODIFIER|DAPPUDRAFT_306526|DAPPUDRAFT_306526|transcript|EFX87748.1|protein_coding||c.-326G>A|||||326|,T|downstream_gene_variant|MODIFIER|DAPPUDRAFT_96684|DAPPUDRAFT_96684|transcript|EFX87747.1|protein_coding||c.*2806G>A|||||2806|,T|intergenic_region|MODIFIER|DAPPUDRAFT_306526-DAPPUDRAFT_96684|DAPPUDRAFT_306526-DAPPUDRAFT_96684|intergenic_region|DAPPUDRAFT_306526-DAPPUDRAFT_9…
485	C284	Copper	Hom-Het	10	577024	TT	CT	Exonic	313898	missense_variant													missense_variant|MODERATE|DAPPUDRAFT_313898|DAPPUDRAFT_313898|transcript|EFX85602.1|protein_coding|5/15|c.641A>G|p.Tyr214Cys|641/2241|641/2241|214/746||,C|upstream_gene_variant|MODIFIER|DAPPUDRAFT_313897|DAPPUDRAFT_313897|transcript|EFX85603.1|protein_coding||c.-3355A>G|||||3355|
486	C284	Copper	Hom-Het	11	1358108	TT	TC	Intronic	314454	3_prime_UTR_variant													3_prime_UTR_variant|MODIFIER|DAPPUDRAFT_314454|DAPPUDRAFT_314454|transcript|EFX85039.2|protein_coding|16/16|c.*329A>G|||||329|,C|upstream_gene_variant|MODIFIER|DAPPUDRAFT_238361|DAPPUDRAFT_238361|transcript|EFX85042.1|protein_coding||c.-2295A>G|||||2295|,C|upstream_gene_variant|MODIFIER|DAPPUDRAFT_238362|DAPPUDRAFT_238362|transcript|EFX85041.1|protein_coding||c.-1525A>G|||||1525|,C|upstream_gene_…
487	C284	Copper	Hom-Het	13	34045	GG	GA	Exonic	239022	synonymous_variant													synonymous_variant|LOW|DAPPUDRAFT_239022|DAPPUDRAFT_239022|transcript|EFX83912.1|protein_coding|3/6|c.288G>A|p.Gln96Gln|288/690|288/690|96/229||,A|upstream_gene_variant|MODIFIER|DAPPUDRAFT_47325|DAPPUDRAFT_47325|transcript|EFX83913.1|protein_coding||c.-3662G>A|||||3662|WARNING_TRANSCRIPT_NO_START_CODON,A|downstream_gene_variant|MODIFIER|DAPPUDRAFT_99751|DAPPUDRAFT_99751|transcript|EFX84333.1|prot…
488	C284	Copper	Hom-Het	26	286295	AA	AG	Exonic	103593	missense_variant													missense_variant|MODERATE|DAPPUDRAFT_103593|DAPPUDRAFT_103593|transcript|EFX80128.1|protein_coding|4/4|c.484A>G|p.Arg162Gly|484/561|484/561|162/186||,G|upstream_gene_variant|MODIFIER|DAPPUDRAFT_51651|DAPPUDRAFT_51651|transcript|EFX80298.1|protein_coding||c.-3655T>C|||||3655|,G|downstream_gene_variant|MODIFIER|DAPPUDRAFT_318738|DAPPUDRAFT_318738|transcript|EFX80297.1|protein_coding||c.*2721T>C||||…
489	C284	Copper	Hom-Het	38	407851	TT	GT	Intergenic	247021	upstream_gene_variant													upstream_gene_variant|MODIFIER|DAPPUDRAFT_247021|DAPPUDRAFT_247021|transcript|EFX77888.1|protein_coding||c.-2309A>C|||||2309|,G|intergenic_region|MODIFIER|DAPPUDRAFT_247021-DAPPUDRAFT_247022|DAPPUDRAFT_247021-DAPPUDRAFT_247022|intergenic_region|DAPPUDRAFT_247021-DAPPUDRAFT_247022|||n.407852T>G||||||
490	C284	Copper	Hom-Het	58	441249	TT	TC	Intergenic	56655	downstream_gene_variant													downstream_gene_variant|MODIFIER|DAPPUDRAFT_56655|DAPPUDRAFT_56655|transcript|EFX74792.1|protein_coding||c.*668T>C|||||668|WARNING_TRANSCRIPT_NO_START_CODON,C|downstream_gene_variant|MODIFIER|DAPPUDRAFT_323993|DAPPUDRAFT_323993|transcript|EFX74834.1|protein_coding||c.*926A>G|||||926|,C|intergenic_region|MODIFIER|DAPPUDRAFT_56655-DAPPUDRAFT_323993|DAPPUDRAFT_56655-DAPPUDRAFT_323993|intergenic_regi…
491	C284	Copper	Hom-Het	66	301777	TT	TG	Intergenic	324958 / 252699	intergenic_region													intergenic_region|MODIFIER|DAPPUDRAFT_324958-DAPPUDRAFT_252699|DAPPUDRAFT_324958-DAPPUDRAFT_252699|intergenic_region|DAPPUDRAFT_324958-DAPPUDRAFT_252699|||n.301778T>G||||||
492	C284	Copper	Hom-Het	74	158247	GG	GT	Intergenic	308080 / 254015	intergenic_region													intergenic_region|MODIFIER|DAPPUDRAFT_308080-DAPPUDRAFT_254015|DAPPUDRAFT_308080-DAPPUDRAFT_254015|intergenic_region|DAPPUDRAFT_308080-DAPPUDRAFT_254015|||n.158248G>T||||||
493	C284	Copper	Hom-Het	81	180737	CC	CT	Intronic	254915	intron_variant													intron_variant|MODIFIER|DAPPUDRAFT_254915|DAPPUDRAFT_254915|transcript|EFX72021.1|protein_coding|4/6|c.438+80C>T||||||
494	C284	Copper	Hom-Het	87	433365	GG	GA	Exonic	327169	missense_variant													missense_variant|MODERATE|DAPPUDRAFT_327169|DAPPUDRAFT_327169|transcript|EFX71499.1|protein_coding|32/32|c.4930G>A|p.Gly1644Ser|4930/5151|4930/5151|1644/1716||,A|upstream_gene_variant|MODIFIER|DpuGr43|DAPPUDRAFT_327170|transcript|EFX71500.1|protein_coding||c.-597G>A|||||597|,A|upstream_gene_variant|MODIFIER|DpuGr12|DAPPUDRAFT_327171|transcript|EFX71501.1|protein_coding||c.-2359G>A|||||2359|,A|ups…
495	C284	Copper	Hom-Het	213	75632	AA	AG	Exonic	303558	missense_variant													missense_variant|MODERATE|DAPPUDRAFT_303558|DAPPUDRAFT_303558|transcript|EFX65707.1|protein_coding|1/4|c.160T>C|p.Tyr54His|160/756|160/756|54/251||WARNING_TRANSCRIPT_NO_START_CODON,G|upstream_gene_variant|MODIFIER|DAPPUDRAFT_303557|DAPPUDRAFT_303557|transcript|EFX65709.1|protein_coding||c.-3474T>C|||||3441|,G|upstream_gene_variant|MODIFIER|DAPPUDRAFT_303549|DAPPUDRAFT_303549|transcript|EFX65708.1…
496	C291	Copper	Hom-Het	1	3880639	GG	AG	Exonic	126671	missense_variant													missense_variant|MODERATE|DAPPUDRAFT_126671|DAPPUDRAFT_126671|transcript|EFX90162.1|protein_coding|4/4|c.667G>A|p.Asp223Asn|667/690|667/690|223/229||,A|upstream_gene_variant|MODIFIER|DAPPUDRAFT_310020|DAPPUDRAFT_310020|transcript|EFX90203.1|protein_coding||c.-3305C>T|||||3305|,A|downstream_gene_variant|MODIFIER|DAPPUDRAFT_299963|DAPPUDRAFT_299963|transcript|EFX90161.1|protein_coding||c.*1497G>A||…
497	C291	Copper	Hom-Het	2	558497	CC	CT	Intergenic	40908	upstream_gene_variant													upstream_gene_variant|MODIFIER|DAPPUDRAFT_40908|DAPPUDRAFT_40908|transcript|EFX89237.1|protein_coding||c.-4761C>T|||||4761|,T|downstream_gene_variant|MODIFIER|DAPPUDRAFT_220367|DAPPUDRAFT_220367|transcript|EFX89236.1|protein_coding||c.*1470C>T|||||1146|,T|intron_variant|MODIFIER|DAPPUDRAFT_94666|DAPPUDRAFT_94666|transcript|EFX89789.1|protein_coding|7/11|c.727-22G>A||||||
498	C291	Copper	Hom-Het	2	2247335	TT	TG	Intronic	40255	splice_region_variant&intron_variant													splice_region_variant&intron_variant|LOW|DAPPUDRAFT_40255|DAPPUDRAFT_40255|transcript|EFX89379.1|protein_coding|10/10|c.1245-7T>G||||||,G|upstream_gene_variant|MODIFIER|LDHA|DAPPUDRAFT_230172|transcript|EFX89380.1|protein_coding||c.-1652T>G|||||1007|,G|upstream_gene_variant|MODIFIER|DAPPUDRAFT_40738|DAPPUDRAFT_40738|transcript|EFX89381.1|protein_coding||c.-3784T>G|||||3784|
499	C291	Copper	Hom-Het	2	2247342	GG	GT	Intronic	40255	splice_region_variant&synonymous_variant													splice_region_variant&synonymous_variant|LOW|DAPPUDRAFT_40255|DAPPUDRAFT_40255|transcript|EFX89379.1|protein_coding|11/11|c.1245G>T|p.Arg415Arg|1245/1335|1245/1335|415/444||,T|upstream_gene_variant|MODIFIER|LDHA|DAPPUDRAFT_230172|transcript|EFX89380.1|protein_coding||c.-1645G>T|||||1000|,T|upstream_gene_variant|MODIFIER|DAPPUDRAFT_40738|DAPPUDRAFT_40738|transcript|EFX89381.1|protein_coding||c.-37…
500	C291	Copper	Hom-Het	2	2247372	CC	CA	Exonic	40255	missense_variant													missense_variant|MODERATE|DAPPUDRAFT_40255|DAPPUDRAFT_40255|transcript|EFX89379.1|protein_coding|11/11|c.1275C>A|p.Phe425Leu|1275/1335|1275/1335|425/444||,A|upstream_gene_variant|MODIFIER|LDHA|DAPPUDRAFT_230172|transcript|EFX89380.1|protein_coding||c.-1615C>A|||||970|,A|upstream_gene_variant|MODIFIER|DAPPUDRAFT_40738|DAPPUDRAFT_40738|transcript|EFX89381.1|protein_coding||c.-3747C>A|||||3747|
501	C291	Copper	Hom-Het	5	1875988	TT	TC	Intergenic	312107	upstream_gene_variant													upstream_gene_variant|MODIFIER|DAPPUDRAFT_312107|DAPPUDRAFT_312107|transcript|EFX87708.1|protein_coding||c.-4356A>G|||||4238|,C|downstream_gene_variant|MODIFIER|DAPPUDRAFT_235385|DAPPUDRAFT_235385|transcript|EFX87707.1|protein_coding||c.*2337A>G|||||2337|,C|intergenic_region|MODIFIER|DAPPUDRAFT_312107-DAPPUDRAFT_235385|DAPPUDRAFT_312107-DAPPUDRAFT_235385|intergenic_region|DAPPUDRAFT_312107-DAPPUD…
502	C291	Copper	Hom-Het	5	2030949	GG	GA	Exonic	43172	missense_variant													missense_variant|MODERATE|DAPPUDRAFT_43172|DAPPUDRAFT_43172|transcript|EFX87692.1|protein_coding|1/3|c.118C>T|p.Pro40Ser|118/465|118/465|40/154||,A|upstream_gene_variant|MODIFIER|DAPPUDRAFT_306437|DAPPUDRAFT_306437|transcript|EFX87614.1|protein_coding||c.-1223G>A|||||618|,A|upstream_gene_variant|MODIFIER|DAPPUDRAFT_306438|DAPPUDRAFT_306438|transcript|EFX87615.1|protein_coding||c.-2908G>A|||||2813|
503	C291	Copper	Hom-Het	7	1849531	GG	GA	Intergenic	236499 / 97742	intergenic_region													intergenic_region|MODIFIER|DAPPUDRAFT_236499-DAPPUDRAFT_97742|DAPPUDRAFT_236499-DAPPUDRAFT_97742|intergenic_region|DAPPUDRAFT_236499-DAPPUDRAFT_97742|||n.1849532G>A||||||
504	C291	Copper	Hom-Het	8	557675	GG	GC	Intronic	313136	intron_variant													intron_variant|MODIFIER|DAPPUDRAFT_313136|DAPPUDRAFT_313136|transcript|EFX86426.1|protein_coding|2/52|c.181-2333C>G||||||
505	C291	Copper	Hom-Het	11	2061161	TT	CT	Intergenic	238523	upstream_gene_variant													upstream_gene_variant|MODIFIER|DAPPUDRAFT_238523|DAPPUDRAFT_238523|transcript|EFX84967.1|protein_coding||c.-1633A>G|||||1633|,C|intergenic_region|MODIFIER|DAPPUDRAFT_238523-DAPPUDRAFT_238528|DAPPUDRAFT_238523-DAPPUDRAFT_238528|intergenic_region|DAPPUDRAFT_238523-DAPPUDRAFT_238528|||n.2061162T>C||||||
506	C291	Copper	Hom-Het	20	1069504	GG	GA	Exonic	49977	synonymous_variant													synonymous_variant|LOW|DAPPUDRAFT_49977|DAPPUDRAFT_49977|transcript|EFX81760.1|protein_coding|23/25|c.3030C>T|p.Tyr1010Tyr|3030/3414|3030/3414|1010/1137||,A|downstream_gene_variant|MODIFIER|DAPPUDRAFT_317372|DAPPUDRAFT_317372|transcript|EFX81690.1|protein_coding||c.*1483G>A|||||1483|
507	C291	Copper	Hom-Het	23	576279	GG	AG	Intergenic	50689	upstream_gene_variant													upstream_gene_variant|MODIFIER|DAPPUDRAFT_50689|DAPPUDRAFT_50689|transcript|EFX81005.1|protein_coding||c.-3017C>T|||||3017|,A|upstream_gene_variant|MODIFIER|DAPPUDRAFT_318059|DAPPUDRAFT_318059|transcript|EFX81004.1|protein_coding||c.-528C>T|||||434|,A|downstream_gene_variant|MODIFIER|DAPPUDRAFT_303742|DAPPUDRAFT_303742|transcript|EFX81003.1|protein_coding||c.*712C>T|||||175|,A|intergenic_region|M…
508	C291	Copper	Hom-Het	28	108967	AA	AG	Intergenic	103920	upstream_gene_variant													upstream_gene_variant|MODIFIER|DAPPUDRAFT_103920|DAPPUDRAFT_103920|transcript|EFX79919.1|protein_coding||c.-4093T>C|||||4093|,G|upstream_gene_variant|MODIFIER|DAPPUDRAFT_103921|DAPPUDRAFT_103921|transcript|EFX79918.1|protein_coding||c.-1457T>C|||||1457|,G|upstream_gene_variant|MODIFIER|DAPPUDRAFT_244363|DAPPUDRAFT_244363|transcript|EFX79728.1|protein_coding||c.-3603A>G|||||3603|,G|intergenic_regi…
509	C291	Copper	Hom-Het	81	401507	TT	TG	Intergenic	326634	upstream_gene_variant													upstream_gene_variant|MODIFIER|DAPPUDRAFT_326634|DAPPUDRAFT_326634|transcript|EFX72057.1|protein_coding||c.-4225A>C|||||4225|,G|upstream_gene_variant|MODIFIER|DAPPUDRAFT_326635|DAPPUDRAFT_326635|transcript|EFX72056.1|protein_coding||c.-3837A>C|||||3837|,G|upstream_gene_variant|MODIFIER|DAPPUDRAFT_326638|DAPPUDRAFT_326638|transcript|EFX72040.1|protein_coding||c.-1300T>G|||||1300|,G|downstream_gene…
510	C291	Copper	Hom-Het	120	64843	GG	GA	Intergenic	189393	downstream_gene_variant													downstream_gene_variant|MODIFIER|DAPPUDRAFT_189393|DAPPUDRAFT_189393|transcript|EFX69094.1|protein_coding||c.*4782G>A|||||4688|,A|downstream_gene_variant|MODIFIER|DAPPUDRAFT_62565|DAPPUDRAFT_62565|transcript|EFX69095.1|protein_coding||c.*1808G>A|||||1808|WARNING_TRANSCRIPT_NO_START_CODON,A|intergenic_region|MODIFIER|DAPPUDRAFT_62565-mir-124|DAPPUDRAFT_62565-EMDPUG00000004035|intergenic_region|DAP…
511	C291	Copper	Hom-Het	183	51698	AA	AT	Intergenic	34498	upstream_gene_variant													upstream_gene_variant|MODIFIER|DAPPUDRAFT_34498|DAPPUDRAFT_34498|transcript|EFX66444.1|protein_coding||c.-766T>A|||||766|WARNING_TRANSCRIPT_NO_START_CODON,T|upstream_gene_variant|MODIFIER|DAPPUDRAFT_229417|DAPPUDRAFT_229417|transcript|EFX66404.1|protein_coding||c.-2262A>T|||||2195|,T|upstream_gene_variant|MODIFIER|DAPPUDRAFT_302710|DAPPUDRAFT_302710|transcript|EFX66405.1|protein_coding||c.-3524A>…
512	C291	Copper	Hom-Het	571	33884	GG	GT	Intronic	335234	intron_variant													intron_variant|MODIFIER|DAPPUDRAFT_335234|DAPPUDRAFT_335234|transcript|EFX63645.1|protein_coding|2/4|c.552+317G>T||||||
513	C291	Copper	Hom-Het	1340	9290	CC	CT	Exonic	301469	missense_variant													missense_variant|MODERATE|DAPPUDRAFT_301469|DAPPUDRAFT_301469|transcript|EFX62335.1|protein_coding|1/1|c.202C>T|p.His68Tyr|202/822|202/756|68/251||,T|upstream_gene_variant|MODIFIER|DAPPUDRAFT_270591|DAPPUDRAFT_270591|transcript|EFX62336.1|protein_coding||c.-2429G>A|||||2429|
514	C291	Copper	Hom-Het	1579	8002	CC	CA	Intergenic	271077	upstream_gene_variant													upstream_gene_variant|MODIFIER|DAPPUDRAFT_271077|DAPPUDRAFT_271077|transcript|EFX62071.1|protein_coding||c.-2867G>T|||||2867|,A|upstream_gene_variant|MODIFIER|DAPPUDRAFT_302031|DAPPUDRAFT_302031|transcript|EFX62070.1|protein_coding||c.-233C>A|||||206|,A|downstream_gene_variant|MODIFIER|DAPPUDRAFT_120557|DAPPUDRAFT_120557|transcript|EFX62069.1|protein_coding||c.*292C>A|||||292|,A|intergenic_region…
515	C299	Copper	Hom-Het	1	1191634	CC	CT	Intergenic	299828	downstream_gene_variant													downstream_gene_variant|MODIFIER|DAPPUDRAFT_299828|DAPPUDRAFT_299828|transcript|EFX89943.1|protein_coding||c.*3426C>T|||||3287|,T|intergenic_region|MODIFIER|DAPPUDRAFT_299828-KLF3|DAPPUDRAFT_299828-DAPPUDRAFT_27999|intergenic_region|DAPPUDRAFT_299828-DAPPUDRAFT_27999|||n.1191635C>T||||||
516	C299	Copper	Hom-Het	3	195715	TT	TC	Exonic	95269	missense_variant													missense_variant|MODERATE|DAPPUDRAFT_95269|DAPPUDRAFT_95269|transcript|EFX89162.1|protein_coding|4/13|c.902A>G|p.Lys301Arg|902/2613|902/2613|301/870||,C|downstream_gene_variant|MODIFIER|DAPPUDRAFT_233572|DAPPUDRAFT_233572|transcript|EFX88497.1|protein_coding||c.*3893T>C|||||3893|,C|downstream_gene_variant|MODIFIER|DAPPUDRAFT_95270|DAPPUDRAFT_95270|transcript|EFX89161.1|protein_coding||c.*3298A>G|…
517	C299	Copper	Hom-Het	4	2699651	AA	AG	Exonic	311747	missense_variant													missense_variant|MODERATE|DAPPUDRAFT_311747|DAPPUDRAFT_311747|transcript|EFX88152.1|protein_coding|2/3|c.116A>G|p.Tyr39Cys|116/375|116/375|39/124||,G|upstream_gene_variant|MODIFIER|DAPPUDRAFT_42067|DAPPUDRAFT_42067|transcript|EFX88234.1|protein_coding||c.-3198T>C|||||3198|WARNING_TRANSCRIPT_NO_START_CODON,G|upstream_gene_variant|MODIFIER|DAPPUDRAFT_311745|DAPPUDRAFT_311745|transcript|EFX88233.1|p…
518	C299	Copper	Hom-Het	7	947962	TT	TA	Intergenic	307848	upstream_gene_variant													upstream_gene_variant|MODIFIER|DAPPUDRAFT_307848|DAPPUDRAFT_307848|transcript|EFX86541.1|protein_coding||c.-1659T>A|||||1520|,A|downstream_gene_variant|MODIFIER|DAPPUDRAFT_44414|DAPPUDRAFT_44414|transcript|EFX86772.1|protein_coding||c.*263A>T|||||263|,A|intergenic_region|MODIFIER|D2HGDH-DAPPUDRAFT_44414|DAPPUDRAFT_307847-DAPPUDRAFT_44414|intergenic_region|DAPPUDRAFT_307847-DAPPUDRAFT_44414|||n.94…
519	C299	Copper	Hom-Het	8	922225	CC	GC	Intergenic	236786	upstream_gene_variant													upstream_gene_variant|MODIFIER|DAPPUDRAFT_236786|DAPPUDRAFT_236786|transcript|EFX86401.1|protein_coding||c.-4977G>C|||||4977|,G|intron_variant|MODIFIER|DAPPUDRAFT_313175|DAPPUDRAFT_313175|transcript|EFX86145.1|protein_coding|3/14|c.325-43C>G||||||
520	C299	Copper	Hom-Het	8	1061067	AA	CA	Intergenic	97992	downstream_gene_variant													downstream_gene_variant|MODIFIER|DAPPUDRAFT_97992|DAPPUDRAFT_97992|transcript|EFX86390.1|protein_coding||c.*4557T>G|||||4557|,C|intron_variant|MODIFIER|DAPPUDRAFT_236811|DAPPUDRAFT_236811|transcript|EFX86159.1|protein_coding|5/7|c.289-76A>C||||||
521	C299	Copper	Hom-Het	13	1288985	CC	CA	Exonic	315175	synonymous_variant													synonymous_variant|LOW|DAPPUDRAFT_315175|DAPPUDRAFT_315175|transcript|EFX84060.1|protein_coding|4/6|c.702C>A|p.Thr234Thr|725/1184|702/1161|234/386||,A|upstream_gene_variant|MODIFIER|DAPPUDRAFT_315173|DAPPUDRAFT_315173|transcript|EFX84189.1|protein_coding||c.-4846G>T|||||4776|,A|upstream_gene_variant|MODIFIER|DAPPUDRAFT_315174|DAPPUDRAFT_315174|transcript|EFX84188.1|protein_coding||c.-1778G>T|||||…
522	C299	Copper	Hom-Het	35	1046910	TT	TG	Intergenic	53261	upstream_gene_variant													upstream_gene_variant|MODIFIER|DAPPUDRAFT_53261|DAPPUDRAFT_53261|transcript|EFX78483.1|protein_coding||c.-3632T>G|||||3632|WARNING_TRANSCRIPT_NO_START_CODON,G|downstream_gene_variant|MODIFIER|DAPPUDRAFT_246314|DAPPUDRAFT_246314|transcript|EFX78490.1|protein_coding||c.*4520A>C|||||4520|,G|intergenic_region|MODIFIER|DAPPUDRAFT_246310-DAPPUDRAFT_53261|DAPPUDRAFT_246310-DAPPUDRAFT_53261|intergenic_re…
523	C299	Copper	Hom-Het	41	698756	AA	CA	Intronic	321563	intron_variant													intron_variant|MODIFIER|DAPPUDRAFT_321563|DAPPUDRAFT_321563|transcript|EFX77290.1|protein_coding|8/19|c.1635+9A>C||||||
524	C299	Copper	Hom-Het	121	139018	GG	GT	Exonic	301200	missense_variant													missense_variant|MODERATE|DAPPUDRAFT_301200|DAPPUDRAFT_301200|transcript|EFX69065.1|protein_coding|2/3|c.233C>A|p.Pro78Gln|935/1375|233/618|78/205||,T|upstream_gene_variant|MODIFIER|DAPPUDRAFT_301174|DAPPUDRAFT_301174|transcript|EFX69066.1|protein_coding||c.-1591C>A|||||1550|,T|downstream_gene_variant|MODIFIER|DAPPUDRAFT_301201|DAPPUDRAFT_301201|transcript|EFX69064.1|protein_coding||c.*1220C>A|||…
525	C299	Copper	Hom-Het	228	37107	GG	GA	Exonic	333266	missense_variant													missense_variant|MODERATE|DAPPUDRAFT_333266|DAPPUDRAFT_333266|transcript|EFX65347.1|protein_coding|6/7|c.715G>A|p.Asp239Asn|715/1062|715/984|239/327||,A|downstream_gene_variant|MODIFIER|DAPPUDRAFT_303646|DAPPUDRAFT_303646|transcript|EFX65345.1|protein_coding||c.*3905G>A|||||3789|,A|downstream_gene_variant|MODIFIER|DAPPUDRAFT_117344|DAPPUDRAFT_117344|transcript|EFX65346.1|protein_coding||c.*1492G>…
526	C300	Copper	Hom-Het	6	2382610	CC	CA	Exonic	312722	missense_variant													missense_variant|MODERATE|DAPPUDRAFT_312722|DAPPUDRAFT_312722|transcript|EFX87160.1|protein_coding|5/10|c.1117G>T|p.Val373Phe|1131/2336|1117/2199|373/732||,A|upstream_gene_variant|MODIFIER|DAPPUDRAFT_97448|DAPPUDRAFT_97448|transcript|EFX87161.1|protein_coding||c.-2855G>T|||||2855|,A|downstream_gene_variant|MODIFIER|DAPPUDRAFT_307167|DAPPUDRAFT_307167|transcript|EFX87159.1|protein_coding||c.*1865G…
527	C300	Copper	Hom-Het	11	626835	CC	CT	Intergenic	194077	upstream_gene_variant													upstream_gene_variant|MODIFIER|DAPPUDRAFT_194077|DAPPUDRAFT_194077|transcript|EFX85114.1|protein_coding||c.-3581G>A|||||3421|,T|upstream_gene_variant|MODIFIER|DAPPUDRAFT_314357|DAPPUDRAFT_314357|transcript|EFX85113.1|protein_coding||c.-2515G>A|||||2515|,T|upstream_gene_variant|MODIFIER|DAPPUDRAFT_194080|DAPPUDRAFT_194080|transcript|EFX85112.1|protein_coding||c.-1621G>A|||||1472|,T|upstream_gene_v…
528	C300	Copper	Hom-Het	19	461476	AA	CA	Exonic	317041	missense_variant													missense_variant|MODERATE|DAPPUDRAFT_317041|DAPPUDRAFT_317041|transcript|EFX82034.1|protein_coding|10/26|c.1301T>G|p.Phe434Cys|1301/3309|1301/3309|434/1102||
529	C300	Copper	Hom-Het	28	817979	GG	GA	Exonic	104041	missense_variant													missense_variant|MODERATE|DAPPUDRAFT_104041|DAPPUDRAFT_104041|transcript|EFX79857.1|protein_coding|1/1|c.1280C>T|p.Ser427Leu|1280/3045|1280/3045|427/1014||
530	C300	Copper	Hom-Het	32	412222	AA	TA	Exonic	305035	synonymous_variant													synonymous_variant|LOW|DAPPUDRAFT_305035|DAPPUDRAFT_305035|transcript|EFX79080.1|protein_coding|5/8|c.1512T>A|p.Val504Val|1559/2369|1512/2304|504/767||,T|upstream_gene_variant|MODIFIER|DAPPUDRAFT_52884|DAPPUDRAFT_52884|transcript|EFX79081.1|protein_coding||c.-4288T>A|||||4288|WARNING_TRANSCRIPT_NO_START_CODON,T|downstream_gene_variant|MODIFIER|DAPPUDRAFT_319910|DAPPUDRAFT_319910|transcript|EFX789…
531	C300	Copper	Hom-Het	49	830397	GG	GC	Intergenic	249640	upstream_gene_variant													upstream_gene_variant|MODIFIER|DAPPUDRAFT_249640|DAPPUDRAFT_249640|transcript|EFX75999.1|protein_coding||c.-684G>C|||||684|,C|intergenic_region|MODIFIER|DAPPUDRAFT_306341-DAPPUDRAFT_249640|DAPPUDRAFT_306341-DAPPUDRAFT_249640|intergenic_region|DAPPUDRAFT_306341-DAPPUDRAFT_249640|||n.830398G>C||||||
532	C300	Copper	Hom-Het	52	100152	AA	AT	Intergenic	199244	upstream_gene_variant													upstream_gene_variant|MODIFIER|DAPPUDRAFT_199244|DAPPUDRAFT_199244|transcript|EFX75648.1|protein_coding||c.-4241T>A|||||3594|,T|intergenic_region|MODIFIER|DAPPUDRAFT_199244-DAPPUDRAFT_27848|DAPPUDRAFT_199244-DAPPUDRAFT_27848|intergenic_region|DAPPUDRAFT_199244-DAPPUDRAFT_27848|||n.100153A>T||||||
533	C300	Copper	Hom-Het	76	604327	CC	CT	Intronic	326142	intron_variant													intron_variant|MODIFIER|DAPPUDRAFT_326142|DAPPUDRAFT_326142|transcript|EFX72577.1|protein_coding|4/6|c.316-10483C>T||||||WARNING_TRANSCRIPT_NO_STOP_CODON
534	C300	Copper	Hom-Het	83	206547	CC	CT	Intergenic	326754	downstream_gene_variant													downstream_gene_variant|MODIFIER|DAPPUDRAFT_326754|DAPPUDRAFT_326754|transcript|EFX71851.1|protein_coding||c.*3151C>T|||||3151|,T|intron_variant|MODIFIER|DAPPUDRAFT_326755|DAPPUDRAFT_326755|transcript|EFX71852.1|protein_coding|6/16|c.738-13C>T||||||
535	C300	Copper	Hom-Het	90	427753	CC	TC	Exonic	309150	missense_variant													missense_variant|MODERATE|DAPPUDRAFT_309150|DAPPUDRAFT_309150|transcript|EFX71233.1|protein_coding|3/12|c.299G>A|p.Arg100Gln|473/1959|299/1458|100/485||,T|upstream_gene_variant|MODIFIER|DAPPUDRAFT_309149|DAPPUDRAFT_309149|transcript|EFX71234.1|protein_coding||c.-4626G>A|||||4544|,T|downstream_gene_variant|MODIFIER|DAPPUDRAFT_327405|DAPPUDRAFT_327405|transcript|EFX71213.1|protein_coding||c.*2707C>…
536	C300	Copper	Hom-Het	139	158968	GG	GA	Intergenic	114815	downstream_gene_variant													downstream_gene_variant|MODIFIER|DAPPUDRAFT_114815|DAPPUDRAFT_114815|transcript|EFX68141.1|protein_coding||c.*2950G>A|||||2950|,A|downstream_gene_variant|MODIFIER|DAPPUDRAFT_203390|DAPPUDRAFT_203390|transcript|EFX68142.1|protein_coding||c.*904G>A|||||904|,A|downstream_gene_variant|MODIFIER|DAPPUDRAFT_63387|DAPPUDRAFT_63387|transcript|EFX68171.1|protein_coding||c.*294C>T|||||294|,A|intergenic_regi…
537	C300	Copper	Hom-Het	146	93605	GG	AG	Intergenic	301782	downstream_gene_variant													downstream_gene_variant|MODIFIER|DAPPUDRAFT_301782|DAPPUDRAFT_301782|transcript|EFX67769.1|protein_coding||c.*4794G>A|||||4557|,A|downstream_gene_variant|MODIFIER|DAPPUDRAFT_261022|DAPPUDRAFT_261022|transcript|EFX67770.1|protein_coding||c.*2876G>A|||||2876|,A|intergenic_region|MODIFIER|DAPPUDRAFT_261022-DAPPUDRAFT_330704|DAPPUDRAFT_261022-DAPPUDRAFT_330704|intergenic_region|DAPPUDRAFT_261022-DAPP…
538	C300	Copper	Hom-Het	422	40303	CC	CT	Intergenic	334845	upstream_gene_variant													upstream_gene_variant|MODIFIER|DAPPUDRAFT_334845|DAPPUDRAFT_334845|transcript|EFX63895.1|protein_coding||c.-295C>T|||||295|,T|upstream_gene_variant|MODIFIER|DAPPUDRAFT_229881|DAPPUDRAFT_229881|transcript|EFX63896.1|protein_coding||c.-3674C>T|||||2693|,T|downstream_gene_variant|MODIFIER|DAPPUDRAFT_305931|DAPPUDRAFT_305931|transcript|EFX63892.1|protein_coding||c.*4947C>T|||||4862|,T|downstream_gene…
539	C300	Copper	Hom-Het	598	3571	AA	GA	Intergenic	335322	upstream_gene_variant													upstream_gene_variant|MODIFIER|DAPPUDRAFT_335322|DAPPUDRAFT_335322|transcript|EFX63565.1|protein_coding||c.-2190A>G|||||2190|WARNING_TRANSCRIPT_NO_START_CODON,G|intergenic_region|MODIFIER|CHR_START-DAPPUDRAFT_335322|CHR_START-DAPPUDRAFT_335322|intergenic_region|CHR_START-DAPPUDRAFT_335322|||n.3572A>G||||||
540	C352	Nickel-Copper	Hom-Het	5	400235	CC	TC	Intergenic	96564 / 42745	intergenic_region													intergenic_region|MODIFIER|DAPPUDRAFT_96564-DAPPUDRAFT_42745|DAPPUDRAFT_96564-DAPPUDRAFT_42745|intergenic_region|DAPPUDRAFT_96564-DAPPUDRAFT_42745|||n.400236C>T||||||
541	C352	Nickel-Copper	Hom-Het	5	1168265	AA	AG	Exonic	306525	synonymous_variant													synonymous_variant|LOW|DAPPUDRAFT_306525|DAPPUDRAFT_306525|transcript|EFX87750.1|protein_coding|8/9|c.1392T>C|p.Val464Val|1574/1861|1392/1485|464/494||,G|upstream_gene_variant|MODIFIER|DAPPUDRAFT_43247|DAPPUDRAFT_43247|transcript|EFX87546.1|protein_coding||c.-3722A>G|||||3722|,G|downstream_gene_variant|MODIFIER|DAPPUDRAFT_306524|DAPPUDRAFT_306524|transcript|EFX87545.1|protein_coding||c.*653A>G|||…
542	C352	Nickel-Copper	Hom-Het	6	1554341	AA	AG	Exonic	299732	missense_variant													missense_variant|MODERATE|DAPPUDRAFT_299732|DAPPUDRAFT_299732|transcript|EFX87280.2|protein_coding|2/2|c.491T>C|p.Ile164Thr|491/1149|491/1149|164/382||,G|downstream_gene_variant|MODIFIER|DAPPUDRAFT_127273|DAPPUDRAFT_127273|transcript|EFX87034.1|protein_coding||c.*1505A>G|||||1505|
543	C352	Nickel-Copper	Hom-Het	11	1878705	CC	CA	Intergenic	314550	upstream_gene_variant													upstream_gene_variant|MODIFIER|DAPPUDRAFT_314550|DAPPUDRAFT_314550|transcript|EFX84984.1|protein_coding||c.-4055G>T|||||4055|,A|upstream_gene_variant|MODIFIER|DAPPUDRAFT_314551|DAPPUDRAFT_314551|transcript|EFX84983.1|protein_coding||c.-3519G>T|||||3519|,A|upstream_gene_variant|MODIFIER|DAPPUDRAFT_300824|DAPPUDRAFT_300824|transcript|EFX84945.1|protein_coding||c.-1514C>A|||||1417|,A|downstream_gene…
544	C352	Nickel-Copper	Hom-Het	23	1232264	GG	GT	Intergenic	ESG / 50585	intergenic_region													intergenic_region|MODIFIER|DAPPUDRAFT_50585-ESG|DAPPUDRAFT_50585-DAPPUDRAFT_347447|intergenic_region|DAPPUDRAFT_50585-DAPPUDRAFT_347447|||n.1232265G>T||||||
545	C352	Nickel-Copper	Hom-Het	29	960587	CC	TC	Intronic	304502	3_prime_UTR_variant													3_prime_UTR_variant|MODIFIER|DAPPUDRAFT_304502|DAPPUDRAFT_304502|transcript|EFX79628.1|protein_coding|12/12|c.*920G>A|||||920|,T|downstream_gene_variant|MODIFIER|DAPPUDRAFT_52191|DAPPUDRAFT_52191|transcript|EFX79562.1|protein_coding||c.*3428C>T|||||3428|
546	C352	Nickel-Copper	Hom-Het	31	350250	AA	GA	Intergenic	104588 / 304939	intergenic_region													intergenic_region|MODIFIER|DAPPUDRAFT_104588-DAPPUDRAFT_304939|DAPPUDRAFT_104588-DAPPUDRAFT_304939|intergenic_region|DAPPUDRAFT_104588-DAPPUDRAFT_304939|||n.350251A>G||||||
547	C352	Nickel-Copper	Hom-Het	47	350615	CC	CT	Intergenic	188575	upstream_gene_variant													upstream_gene_variant|MODIFIER|DAPPUDRAFT_188575|DAPPUDRAFT_188575|transcript|EFX76259.1|protein_coding||c.-4956C>T|||||4956|,T|intergenic_region|MODIFIER|TERT-DAPPUDRAFT_188575|DAPPUDRAFT_346816-DAPPUDRAFT_188575|intergenic_region|DAPPUDRAFT_346816-DAPPUDRAFT_188575|||n.350616C>T||||||
548	C352	Nickel-Copper	Hom-Het	62	51863	CC	TC	Intergenic	251987 / 57291	intergenic_region													intergenic_region|MODIFIER|DAPPUDRAFT_251987-DAPPUDRAFT_57291|DAPPUDRAFT_251987-DAPPUDRAFT_57291|intergenic_region|DAPPUDRAFT_251987-DAPPUDRAFT_57291|||n.51864C>T||||||
549	C352	Nickel-Copper	Hom-Het	79	494316	GG	TG	Exonic	254739	synonymous_variant													synonymous_variant|LOW|DAPPUDRAFT_254739|DAPPUDRAFT_254739|transcript|EFX72248.1|protein_coding|1/1|c.201C>A|p.Ile67Ile|201/297|201/297|67/98||,T|upstream_gene_variant|MODIFIER|DAPPUDRAFT_254740|DAPPUDRAFT_254740|transcript|EFX72231.1|protein_coding||c.-285G>T|||||285|,T|upstream_gene_variant|MODIFIER|DAPPUDRAFT_227614|DAPPUDRAFT_227614|transcript|EFX72232.1|protein_coding||c.-2702G>T|||||2680|
550	C352	Nickel-Copper	Hom-Het	92	386977	GG	GT	Exonic	14562	missense_variant													missense_variant|MODERATE|DAPPUDRAFT_14562|DAPPUDRAFT_14562|transcript|EFX71035.1|protein_coding|1/1|c.592C>A|p.Pro198Thr|592/666|592/666|198/221||WARNING_TRANSCRIPT_NO_STOP_CODON,T|upstream_gene_variant|MODIFIER|DAPPUDRAFT_112172|DAPPUDRAFT_112172|transcript|EFX71036.1|protein_coding||c.-4480C>A|||||4480|,T|downstream_gene_variant|MODIFIER|DAPPUDRAFT_256340|DAPPUDRAFT_256340|transcript|EFX71034.…
551	C352	Nickel-Copper	Hom-Het	95	384281	AA	AT	Intergenic	UNOP1	intergenic_region													intergenic_region|MODIFIER|UNOP1-DAPPUDRAFT_112390|DAPPUDRAFT_346930-DAPPUDRAFT_112390|intergenic_region|DAPPUDRAFT_346930-DAPPUDRAFT_112390|||n.384282A>T||||||
552	C352	Nickel-Copper	Hom-Het	144	297641	GG	TG	Intergenic	260908	upstream_gene_variant													upstream_gene_variant|MODIFIER|DAPPUDRAFT_260908|DAPPUDRAFT_260908|transcript|EFX67921.1|protein_coding||c.-4328C>A|||||4328|,T|intergenic_region|MODIFIER|DAPPUDRAFT_260908-DAPPUDRAFT_330601|DAPPUDRAFT_260908-DAPPUDRAFT_330601|intergenic_region|DAPPUDRAFT_260908-DAPPUDRAFT_330601|||n.297642G>T||||||
553	C352	Nickel-Copper	Hom-Het	144	297659	CC	TC	Intergenic	260908	upstream_gene_variant													upstream_gene_variant|MODIFIER|DAPPUDRAFT_260908|DAPPUDRAFT_260908|transcript|EFX67921.1|protein_coding||c.-4346G>A|||||4346|,T|intergenic_region|MODIFIER|DAPPUDRAFT_260908-DAPPUDRAFT_330601|DAPPUDRAFT_260908-DAPPUDRAFT_330601|intergenic_region|DAPPUDRAFT_260908-DAPPUDRAFT_330601|||n.297660C>T||||||
554	C352	Nickel-Copper	Hom-Het	242	107877	AA	AT	Intergenic	265222	upstream_gene_variant													upstream_gene_variant|MODIFIER|DAPPUDRAFT_265222|DAPPUDRAFT_265222|transcript|EFX65104.1|protein_coding||c.-2164T>A|||||2164|,T|upstream_gene_variant|MODIFIER|DAPPUDRAFT_265223|DAPPUDRAFT_265223|transcript|EFX65103.1|protein_coding||c.-1341T>A|||||1341|,T|upstream_gene_variant|MODIFIER|DAPPUDRAFT_333525|DAPPUDRAFT_333525|transcript|EFX65102.1|protein_coding||c.-1122T>A|||||1122|,T|downstream_gene…
555	C355	Nickel-Copper	Hom-Het	4	226031	GG	GA	Intergenic	191515	upstream_gene_variant													upstream_gene_variant|MODIFIER|DAPPUDRAFT_191515|DAPPUDRAFT_191515|transcript|EFX88456.1|protein_coding||c.-4618C>T|||||4618|,A|upstream_gene_variant|MODIFIER|DAPPUDRAFT_95911|DAPPUDRAFT_95911|transcript|EFX87865.1|protein_coding||c.-757G>A|||||757|,A|downstream_gene_variant|MODIFIER|DAPPUDRAFT_230293|DAPPUDRAFT_230293|transcript|EFX87864.1|protein_coding||c.*2892G>A|||||2240|,A|downstream_gene_v…
556	C355	Nickel-Copper	Hom-Het	6	2217035	AA	AG	Exonic	312683	missense_variant													missense_variant|MODERATE|DAPPUDRAFT_312683|DAPPUDRAFT_312683|transcript|EFX87124.1|protein_coding|7/7|c.888A>G|p.Ile296Met|888/891|888/891|296/296||,G|upstream_gene_variant|MODIFIER|DAPPUDRAFT_187433|DAPPUDRAFT_187433|transcript|EFX87182.1|protein_coding||c.-4101T>C|||||1688|,G|downstream_gene_variant|MODIFIER|DAPPUDRAFT_97404|DAPPUDRAFT_97404|transcript|EFX87181.1|protein_coding||c.*1238T>C||||…
557	C355	Nickel-Copper	Hom-Het	21	1264536	CC	CT	Intergenic	7338 / 211388	intergenic_region													intergenic_region|MODIFIER|DAPPUDRAFT_7338-DAPPUDRAFT_211388|DAPPUDRAFT_7338-DAPPUDRAFT_211388|intergenic_region|DAPPUDRAFT_7338-DAPPUDRAFT_211388|||n.1264537C>T||||||
558	C355	Nickel-Copper	Hom-Het	24	1283407	CC	CT	Exonic	318416	synonymous_variant													synonymous_variant|LOW|DAPPUDRAFT_318416|DAPPUDRAFT_318416|transcript|EFX80705.1|protein_coding|6/9|c.2028C>T|p.Val676Val|2028/5280|2028/5280|676/1759||,T|downstream_gene_variant|MODIFIER|DAPPUDRAFT_27344|DAPPUDRAFT_27344|transcript|EFX80704.1|protein_coding||c.*3789C>T|||||3789|WARNING_TRANSCRIPT_NO_START_CODON
559	C355	Nickel-Copper	Hom-Het	31	665916	AA	AG	Intergenic	304955 / 245225	intergenic_region													intergenic_region|MODIFIER|DAPPUDRAFT_304955-DAPPUDRAFT_245225|DAPPUDRAFT_304955-DAPPUDRAFT_245225|intergenic_region|DAPPUDRAFT_304955-DAPPUDRAFT_245225|||n.665917A>G||||||
560	C355	Nickel-Copper	Hom-Het	47	497100	TT	TC	Exonic	306240	synonymous_variant													synonymous_variant|LOW|DAPPUDRAFT_306240|DAPPUDRAFT_306240|transcript|EFX76353.1|protein_coding|1/3|c.78A>G|p.Glu26Glu|309/2229|78/1872|26/623||,C|upstream_gene_variant|MODIFIER|DAPPUDRAFT_249169|DAPPUDRAFT_249169|transcript|EFX76268.1|protein_coding||c.-1044T>C|||||1044|,C|upstream_gene_variant|MODIFIER|DAPPUDRAFT_198981|DAPPUDRAFT_198981|transcript|EFX76269.1|protein_coding||c.-3531T>C|||||3262…
561	C355	Nickel-Copper	Hom-Het	70	608645	CC	TC	Exonic	110040	synonymous_variant													synonymous_variant|LOW|DAPPUDRAFT_110040|DAPPUDRAFT_110040|transcript|EFX73239.1|protein_coding|2/2|c.354C>T|p.Asp118Asp|354/891|354/891|118/296||,T|downstream_gene_variant|MODIFIER|DAPPUDRAFT_307962|DAPPUDRAFT_307962|transcript|EFX73235.1|protein_coding||c.*4280C>T|||||4172|,T|downstream_gene_variant|MODIFIER|DAPPUDRAFT_307936|DAPPUDRAFT_307936|transcript|EFX73236.1|protein_coding||c.*3386C>T|||…
562	C355	Nickel-Copper	Hom-Het	119	16613	CC	AC	Exonic	329385	missense_variant													missense_variant|MODERATE|DAPPUDRAFT_329385|DAPPUDRAFT_329385|transcript|EFX69145.1|protein_coding|12/28|c.2005C>A|p.Pro669Thr|2005/5850|2005/5850|669/1949||
563	C355	Nickel-Copper	Hom-Het	149	122280	CC	TC	Intergenic	115251	upstream_gene_variant													upstream_gene_variant|MODIFIER|DAPPUDRAFT_115251|DAPPUDRAFT_115251|transcript|EFX67669.1|protein_coding||c.-3702G>A|||||3702|,T|intergenic_region|MODIFIER|DAPPUDRAFT_115251-DAPPUDRAFT_261239|DAPPUDRAFT_115251-DAPPUDRAFT_261239|intergenic_region|DAPPUDRAFT_115251-DAPPUDRAFT_261239|||n.122281C>T||||||
564	C355	Nickel-Copper	Hom-Het	422	40627	GG	GA	Exonic	334845	synonymous_variant													synonymous_variant|LOW|DAPPUDRAFT_334845|DAPPUDRAFT_334845|transcript|EFX63895.1|protein_coding|1/4|c.30G>A|p.Leu10Leu|30/1413|30/1413|10/470||,A|upstream_gene_variant|MODIFIER|DAPPUDRAFT_229881|DAPPUDRAFT_229881|transcript|EFX63896.1|protein_coding||c.-3350G>A|||||2369|,A|downstream_gene_variant|MODIFIER|DAPPUDRAFT_334843|DAPPUDRAFT_334843|transcript|EFX63893.1|protein_coding||c.*2450G>A|||||245…
565	C364	Nickel-Copper	Hom-Het	1	498336	TT	TC	Intergenic	93970	upstream_gene_variant													upstream_gene_variant|MODIFIER|DAPPUDRAFT_93970|DAPPUDRAFT_93970|transcript|EFX90430.1|protein_coding||c.-3726A>G|||||3726|,C|downstream_gene_variant|MODIFIER|DAPPUDRAFT_39785|DAPPUDRAFT_39785|transcript|EFX90429.1|protein_coding||c.*4059A>G|||||4059|,C|intergenic_region|MODIFIER|DAPPUDRAFT_93970-DAPPUDRAFT_39785|DAPPUDRAFT_93970-DAPPUDRAFT_39785|intergenic_region|DAPPUDRAFT_93970-DAPPUDRAFT_3978…
566	C364	Nickel-Copper	Hom-Het	2	15950	GG	AG	Exonic	346971	missense_variant													missense_variant|MODERATE|DAPPUDRAFT_346971|DAPPUDRAFT_346971|transcript|EFX89859.1|protein_coding|34/35|c.4865C>T|p.Ser1622Leu|4996/5431|4865/5160|1622/1719||,A|downstream_gene_variant|MODIFIER|DAPPUDRAFT_232780|DAPPUDRAFT_232780|transcript|EFX89187.1|protein_coding||c.*4091G>A|||||4091|
567	C364	Nickel-Copper	Hom-Het	4	1768476	AA	AG	Intergenic	42022	upstream_gene_variant													upstream_gene_variant|MODIFIER|DAPPUDRAFT_42022|DAPPUDRAFT_42022|transcript|EFX88320.1|protein_coding||c.-2843T>C|||||2843|,G|upstream_gene_variant|MODIFIER|DAPPUDRAFT_191776|DAPPUDRAFT_191776|transcript|EFX88026.1|protein_coding||c.-514A>G|||||441|,G|upstream_gene_variant|MODIFIER|DAPPUDRAFT_311540|DAPPUDRAFT_311540|transcript|EFX88027.1|protein_coding||c.-4485A>G|||||4485|,G|downstream_gene_var…
568	C364	Nickel-Copper	Hom-Het	8	2116478	CC	AC	Intergenic	45012	upstream_gene_variant													upstream_gene_variant|MODIFIER|DAPPUDRAFT_45012|DAPPUDRAFT_45012|transcript|EFX86268.1|protein_coding||c.-1037C>A|||||1037|WARNING_TRANSCRIPT_NO_START_CODON,A|upstream_gene_variant|MODIFIER|DAPPUDRAFT_98176|DAPPUDRAFT_98176|transcript|EFX86269.1|protein_coding||c.-3785C>A|||||3785|,A|downstream_gene_variant|MODIFIER|DAPPUDRAFT_237022|DAPPUDRAFT_237022|transcript|EFX86265.1|protein_coding||c.*4258…
569	C364	Nickel-Copper	Hom-Het	30	429509	GG	GA	Exonic	231033	synonymous_variant													synonymous_variant|LOW|DAPPUDRAFT_231033|DAPPUDRAFT_231033|transcript|EFX79446.1|protein_coding|1/1|c.702C>T|p.Gly234Gly|1161/1269|702/783|234/260||,A|upstream_gene_variant|MODIFIER|DAPPUDRAFT_304848|DAPPUDRAFT_304848|transcript|EFX79449.1|protein_coding||c.-4330C>T|||||4330|,A|upstream_gene_variant|MODIFIER|DAPPUDRAFT_52589|DAPPUDRAFT_52589|transcript|EFX79448.1|protein_coding||c.-1493C>T|||||14…
570	C364	Nickel-Copper	Hom-Het	44	990179	CC	TC	Intergenic	322072	upstream_gene_variant													upstream_gene_variant|MODIFIER|DAPPUDRAFT_322072|DAPPUDRAFT_322072|transcript|EFX76836.1|protein_coding||c.-405C>T|||||405|,T|downstream_gene_variant|MODIFIER|DAPPUDRAFT_248606|DAPPUDRAFT_248606|transcript|EFX76835.1|protein_coding||c.*1221C>T|||||1221|,T|downstream_gene_variant|MODIFIER|DAPPUDRAFT_106757|DAPPUDRAFT_106757|transcript|EFX76845.1|protein_coding||c.*3263G>A|||||3263|,T|intergenic_re…
571	C364	Nickel-Copper	Hom-Het	65	325479	TT	TC	Intergenic	252542	downstream_gene_variant													downstream_gene_variant|MODIFIER|DAPPUDRAFT_252542|DAPPUDRAFT_252542|transcript|EFX73862.1|protein_coding||c.*4000T>C|||||4000|,C|downstream_gene_variant|MODIFIER|DAPPUDRAFT_324855|DAPPUDRAFT_324855|transcript|EFX73863.1|protein_coding||c.*3134T>C|||||3134|,C|downstream_gene_variant|MODIFIER|DAPPUDRAFT_109399|DAPPUDRAFT_109399|transcript|EFX73864.1|protein_coding||c.*1404T>C|||||1404|,C|downstrea…
572	C364	Nickel-Copper	Hom-Het	140	66212	AA	AC	Exonic	114842	missense_variant													missense_variant|MODERATE|DAPPUDRAFT_114842|DAPPUDRAFT_114842|transcript|EFX68079.1|protein_coding|1/2|c.227A>C|p.Glu76Ala|227/3678|227/3678|76/1225||,C|upstream_gene_variant|MODIFIER|DAPPUDRAFT_330395|DAPPUDRAFT_330395|transcript|EFX68080.1|protein_coding||c.-4568A>C|||||4568|,C|downstream_gene_variant|MODIFIER|DAPPUDRAFT_114841|DAPPUDRAFT_114841|transcript|EFX68078.1|protein_coding||c.*4108A>C|…
573	C364	Nickel-Copper	Hom-Het	152	56530	CC	TC	Intergenic	347444	upstream_gene_variant													upstream_gene_variant|MODIFIER|DAPPUDRAFT_347444|DAPPUDRAFT_347444|transcript|EFX67564.2|protein_coding||c.-3953C>T|||||3953|,T|downstream_gene_variant|MODIFIER|DAPPUDRAFT_330918|DAPPUDRAFT_330918|transcript|EFX67563.1|protein_coding||c.*1180C>T|||||1180|,T|intergenic_region|MODIFIER|DAPPUDRAFT_330918-DAPPUDRAFT_347444|DAPPUDRAFT_330918-DAPPUDRAFT_347444|intergenic_region|DAPPUDRAFT_330918-DAPPUD…
574	C372	Nickel-Copper	Hom-Het	2	41435	GG	AG	Exonic	20932	synonymous_variant													synonymous_variant|LOW|DAPPUDRAFT_20932|DAPPUDRAFT_20932|transcript|EFX89854.1|protein_coding|9/10|c.1839C>T|p.Leu613Leu|1839/2109|1839/2109|613/702||WARNING_TRANSCRIPT_NO_START_CODON,A|downstream_gene_variant|MODIFIER|DAPPUDRAFT_220308|DAPPUDRAFT_220308|transcript|EFX89189.1|protein_coding||c.*4119G>A|||||3881|
575	C372	Nickel-Copper	Hom-Het	2	1970222	TT	TG	Intergenic	40490	upstream_gene_variant													upstream_gene_variant|MODIFIER|DAPPUDRAFT_40490|DAPPUDRAFT_40490|transcript|EFX89648.1|protein_coding||c.-17A>C|||||17|WARNING_TRANSCRIPT_NO_START_CODON,G|upstream_gene_variant|MODIFIER|DAPPUDRAFT_220501|DAPPUDRAFT_220501|transcript|EFX89350.1|protein_coding||c.-3268T>G|||||3037|,G|downstream_gene_variant|MODIFIER|DAPPUDRAFT_303178|DAPPUDRAFT_303178|transcript|EFX89349.1|protein_coding||c.*4743T>…
576	C372	Nickel-Copper	Hom-Het	8	2014680	CC	TC	Exonic	222251	missense_variant													missense_variant|MODERATE|DAPPUDRAFT_222251|DAPPUDRAFT_222251|transcript|EFX86249.1|protein_coding|5/6|c.809C>T|p.Ser270Leu|867/1257|809/1080|270/359||,T|upstream_gene_variant|MODIFIER|DAPPUDRAFT_308521|DAPPUDRAFT_308521|transcript|EFX86310.1|protein_coding||c.-4607G>A|||||4607|,T|upstream_gene_variant|MODIFIER|DAPPUDRAFT_222252|DAPPUDRAFT_222252|transcript|EFX86250.1|protein_coding||c.-1939C>T||…
577	C372	Nickel-Copper	Hom-Het	32	914024	CC	TC	Intergenic	305006 / 245458	intergenic_region													intergenic_region|MODIFIER|DAPPUDRAFT_305006-DAPPUDRAFT_245458|DAPPUDRAFT_305006-DAPPUDRAFT_245458|intergenic_region|DAPPUDRAFT_305006-DAPPUDRAFT_245458|||n.914025C>T||||||
578	C372	Nickel-Copper	Hom-Het	39	1028110	GG	TG	Intergenic	105963	upstream_gene_variant													upstream_gene_variant|MODIFIER|DAPPUDRAFT_105963|DAPPUDRAFT_105963|transcript|EFX77688.1|protein_coding||c.-2018G>T|||||2018|,T|intergenic_region|MODIFIER|DAPPUDRAFT_28712-DAPPUDRAFT_105963|DAPPUDRAFT_28712-DAPPUDRAFT_105963|intergenic_region|DAPPUDRAFT_28712-DAPPUDRAFT_105963|||n.1028111G>T||||||
579	C372	Nickel-Copper	Hom-Het	73	510812	GG	GA	Intergenic	308045	downstream_gene_variant													downstream_gene_variant|MODIFIER|DAPPUDRAFT_308045|DAPPUDRAFT_308045|transcript|EFX72823.1|protein_coding||c.*2988G>A|||||2181|,A|intergenic_region|MODIFIER|DAPPUDRAFT_308045-DAPPUDRAFT_215757|DAPPUDRAFT_308045-DAPPUDRAFT_215757|intergenic_region|DAPPUDRAFT_308045-DAPPUDRAFT_215757|||n.510813G>A||||||
580	C372	Nickel-Copper	Hom-Het	111	39521	CC	AC	Intergenic	300874	intergenic_region													intergenic_region|MODIFIER|CHR_START-DAPPUDRAFT_300874|CHR_START-DAPPUDRAFT_300874|intergenic_region|CHR_START-DAPPUDRAFT_300874|||n.39522C>A||||||
581	C372	Nickel-Copper	Hom-Het	115	104396	GG	GA	Intergenic	329118	downstream_gene_variant													downstream_gene_variant|MODIFIER|DAPPUDRAFT_329118|DAPPUDRAFT_329118|transcript|EFX69363.1|protein_coding||c.*1748G>A|||||1658|,A|downstream_gene_variant|MODIFIER|DAPPUDRAFT_258637|DAPPUDRAFT_258637|transcript|EFX69425.1|protein_coding||c.*631C>T|||||631|,A|intergenic_region|MODIFIER|DAPPUDRAFT_329118-DAPPUDRAFT_258637|DAPPUDRAFT_329118-DAPPUDRAFT_258637|intergenic_region|DAPPUDRAFT_329118-DAPPUD…
582	C372	Nickel-Copper	Hom-Het	131	146955	TT	TA	Intronic	301423	5_prime_UTR_variant													5_prime_UTR_variant|MODIFIER|DAPPUDRAFT_301423|DAPPUDRAFT_301423|transcript|EFX68531.1|protein_coding|1/1|c.-3376T>A|||||3376|
583	C372	Nickel-Copper	Hom-Het	138	82074	TT	TA	Exonic	299616	stop_gained													stop_gained|HIGH|DAPPUDRAFT_299616|DAPPUDRAFT_299616|transcript|EFX68190.2|protein_coding|1/9|c.23T>A|p.Leu8*|23/1995|23/1449|8/482||,A|downstream_gene_variant|MODIFIER|DAPPUDRAFT_299609|DAPPUDRAFT_299609|transcript|EFX68189.1|protein_coding||c.*4219T>A|||||3943|
584	C372	Nickel-Copper	Hom-Het	162	218897	CC	CT	Intergenic	HKB / 331336	intergenic_region													intergenic_region|MODIFIER|DAPPUDRAFT_331336-HKB|DAPPUDRAFT_331336-DAPPUDRAFT_331337|intergenic_region|DAPPUDRAFT_331336-DAPPUDRAFT_331337|||n.218898C>T||||||
585	C374	Nickel-Copper	Hom-Het	1	3432244	TT	AT	Intergenic	232652	upstream_gene_variant													upstream_gene_variant|MODIFIER|DAPPUDRAFT_232652|DAPPUDRAFT_232652|transcript|EFX90216.1|protein_coding||c.-2010A>T|||||2010|,A|intergenic_region|MODIFIER|DAPPUDRAFT_232652-DAPPUDRAFT_94461|DAPPUDRAFT_232652-DAPPUDRAFT_94461|intergenic_region|DAPPUDRAFT_232652-DAPPUDRAFT_94461|||n.3432245T>A||||||
586	C374	Nickel-Copper	Hom-Het	2	1918357	TT	CT	Intergenic	233162	upstream_gene_variant													upstream_gene_variant|MODIFIER|DAPPUDRAFT_233162|DAPPUDRAFT_233162|transcript|EFX89652.1|protein_coding||c.-2340A>G|||||2340|,C|downstream_gene_variant|MODIFIER|DAPPUDRAFT_233164|DAPPUDRAFT_233164|transcript|EFX89650.1|protein_coding||c.*4599A>G|||||4599|,C|intron_variant|MODIFIER|DAPPUDRAFT_233163|DAPPUDRAFT_233163|transcript|EFX89651.1|protein_coding|5/5|c.291+94A>G||||||
587	C374	Nickel-Copper	Hom-Het	10	1079003	AA	AC	Intergenic	314031	upstream_gene_variant													upstream_gene_variant|MODIFIER|DAPPUDRAFT_314031|DAPPUDRAFT_314031|transcript|EFX85303.1|protein_coding||c.-508A>C|||||508|,C|upstream_gene_variant|MODIFIER|DAPPUDRAFT_314032|DAPPUDRAFT_314032|transcript|EFX85304.1|protein_coding||c.-2045A>C|||||2045|,C|upstream_gene_variant|MODIFIER|DAPPUDRAFT_300277|DAPPUDRAFT_300277|transcript|EFX85305.1|protein_coding||c.-3411A>C|||||3248|,C|downstream_gene_v…
588	C374	Nickel-Copper	Hom-Het	27	537024	GG	GA	Intergenic	244164	upstream_gene_variant													upstream_gene_variant|MODIFIER|DAPPUDRAFT_244164|DAPPUDRAFT_244164|transcript|EFX79967.1|protein_coding||c.-699G>A|||||699|,A|upstream_gene_variant|MODIFIER|DAPPUDRAFT_318984|DAPPUDRAFT_318984|transcript|EFX79968.1|protein_coding||c.-4735G>A|||||4735|,A|downstream_gene_variant|MODIFIER|DAPPUDRAFT_318982|DAPPUDRAFT_318982|transcript|EFX79966.1|protein_coding||c.*3733G>A|||||3733|,A|intergenic_regi…
589	C374	Nickel-Copper	Hom-Het	32	427008	GG	AG	Exonic	188353	missense_variant													missense_variant|MODERATE|DAPPUDRAFT_188353|DAPPUDRAFT_188353|transcript|EFX78989.1|protein_coding|1/8|c.65G>A|p.Arg22His|139/1580|65/1506|22/501||,A|upstream_gene_variant|MODIFIER|DAPPUDRAFT_231060|DAPPUDRAFT_231060|transcript|EFX79078.1|protein_coding||c.-3617C>T|||||3557|,A|upstream_gene_variant|MODIFIER|DAPPUDRAFT_128610|DAPPUDRAFT_128610|transcript|EFX79077.1|protein_coding||c.-593C>T|||||59…
590	C374	Nickel-Copper	Hom-Het	42	165351	GG	AG	Intergenic	SP8	intergenic_region													intergenic_region|MODIFIER|SP8-DAPPUDRAFT_106304|DAPPUDRAFT_106303-DAPPUDRAFT_106304|intergenic_region|DAPPUDRAFT_106303-DAPPUDRAFT_106304|||n.165352G>A||||||
591	C374	Nickel-Copper	Hom-Het	76	605380	CC	CA	Intronic	326142	intron_variant													intron_variant|MODIFIER|DAPPUDRAFT_326142|DAPPUDRAFT_326142|transcript|EFX72577.1|protein_coding|4/6|c.316-9430C>A||||||WARNING_TRANSCRIPT_NO_STOP_CODON
592	C374	Nickel-Copper	Hom-Het	99	141248	AA	AC	Intergenic	328308	upstream_gene_variant													upstream_gene_variant|MODIFIER|DAPPUDRAFT_328308|DAPPUDRAFT_328308|transcript|EFX70463.1|protein_coding||c.-198T>G|||||198|,C|downstream_gene_variant|MODIFIER|DAPPUDRAFT_328306|DAPPUDRAFT_328306|transcript|EFX70400.1|protein_coding||c.*1777A>C|||||807|,C|downstream_gene_variant|MODIFIER|DAPPUDRAFT_231612|DAPPUDRAFT_231612|transcript|EFX70462.1|protein_coding||c.*3989T>G|||||3809|,C|intergenic_reg…
593	C374	Nickel-Copper	Hom-Het	133	164106	GG	GT	Intronic	330092	intron_variant													intron_variant|MODIFIER|DAPPUDRAFT_330092|DAPPUDRAFT_330092|transcript|EFX68436.1|protein_coding|5/5|c.964+236G>T||||||
594	C374	Nickel-Copper	Hom-Het	215	129518	CC	CA	Intergenic	264406	upstream_gene_variant													upstream_gene_variant|MODIFIER|DAPPUDRAFT_264406|DAPPUDRAFT_264406|transcript|EFX65654.1|protein_coding||c.-1191C>A|||||1191|,A|intergenic_region|MODIFIER|DAPPUDRAFT_117093-DAPPUDRAFT_264406|DAPPUDRAFT_117093-DAPPUDRAFT_264406|intergenic_region|DAPPUDRAFT_117093-DAPPUDRAFT_264406|||n.129519C>A||||||
595	C374	Nickel-Copper	Hom-Het	266	6636	AA	TA	Intergenic	117821	upstream_gene_variant													upstream_gene_variant|MODIFIER|DAPPUDRAFT_117821|DAPPUDRAFT_117821|transcript|EFX64820.1|protein_coding||c.-4777T>A|||||4777|,T|intron_variant|MODIFIER|DAPPUDRAFT_333806|DAPPUDRAFT_333806|transcript|EFX64809.1|protein_coding|1/4|c.243-27A>T||||||
596	C374	Nickel-Copper	Hom-Het	436	28317	AA	TA	Intronic	334894	intron_variant													intron_variant|MODIFIER|DAPPUDRAFT_334894|DAPPUDRAFT_334894|transcript|EFX63860.1|protein_coding|2/5|c.126+4694A>T||||||
597	C376	Nickel-Copper	Hom-Het	3	3227652	GG	GA	Intronic	41569	intron_variant													intron_variant|MODIFIER|DAPPUDRAFT_41569|DAPPUDRAFT_41569|transcript|EFX88772.1|protein_coding|2/4|c.395+3816G>A||||||
598	C376	Nickel-Copper	Hom-Het	23	55715	AA	AG	Intergenic	102767 / 317966	intergenic_region													intergenic_region|MODIFIER|DAPPUDRAFT_102767-DAPPUDRAFT_317966|DAPPUDRAFT_102767-DAPPUDRAFT_317966|intergenic_region|DAPPUDRAFT_102767-DAPPUDRAFT_317966|||n.55716A>G||||||
599	C376	Nickel-Copper	Hom-Het	31	828326	CC	TC	Intergenic	104643 / 128585	intergenic_region													intergenic_region|MODIFIER|DAPPUDRAFT_104643-DAPPUDRAFT_128585|DAPPUDRAFT_104643-DAPPUDRAFT_128585|intergenic_region|DAPPUDRAFT_104643-DAPPUDRAFT_128585|||n.828327C>T||||||
600	C376	Nickel-Copper	Hom-Het	39	847333	GG	AG	Intergenic	305404	downstream_gene_variant													downstream_gene_variant|MODIFIER|DAPPUDRAFT_305404|DAPPUDRAFT_305404|transcript|EFX77675.1|protein_coding||c.*5013G>A|||||4189|,A|intron_variant|MODIFIER|DAPPUDRAFT_305405|DAPPUDRAFT_305405|transcript|EFX77710.1|protein_coding|4/5|c.203+810C>T||||||
601	C376	Nickel-Copper	Hom-Het	46	301353	GG	GC	Intergenic	26393	upstream_gene_variant													upstream_gene_variant|MODIFIER|DAPPUDRAFT_26393|DAPPUDRAFT_26393|transcript|EFX76527.1|protein_coding||c.-4081C>G|||||4081|WARNING_TRANSCRIPT_NO_START_CODON,C|upstream_gene_variant|MODIFIER|DAPPUDRAFT_198891|DAPPUDRAFT_198891|transcript|EFX76526.1|protein_coding||c.-1652C>G|||||1509|,C|upstream_gene_variant|MODIFIER|DAPPUDRAFT_322302|DAPPUDRAFT_322302|transcript|EFX76420.1|protein_coding||c.-69G>…
602	C376	Nickel-Copper	Hom-Het	90	233860	CC	CA	Intergenic	309138	upstream_gene_variant													upstream_gene_variant|MODIFIER|DAPPUDRAFT_309138|DAPPUDRAFT_309138|transcript|EFX71194.1|protein_coding||c.-2957C>A|||||2292|,A|downstream_gene_variant|MODIFIER|DAPPUDRAFT_60469|DAPPUDRAFT_60469|transcript|EFX71193.1|protein_coding||c.*1062C>A|||||1062|WARNING_TRANSCRIPT_NO_START_CODON,A|downstream_gene_variant|MODIFIER|DAPPUDRAFT_216884|DAPPUDRAFT_216884|transcript|EFX71254.1|protein_coding||c.*…
603	C376	Nickel-Copper	Hom-Het	100	184874	GG	AG	Intergenic	300507	upstream_gene_variant													upstream_gene_variant|MODIFIER|DAPPUDRAFT_300507|DAPPUDRAFT_300507|transcript|EFX70359.1|protein_coding||c.-4171C>T|||||3510|,A|upstream_gene_variant|MODIFIER|DAPPUDRAFT_328154|DAPPUDRAFT_328154|transcript|EFX70358.1|protein_coding||c.-2130C>T|||||2130|,A|downstream_gene_variant|MODIFIER|DAPPUDRAFT_300508|DAPPUDRAFT_300508|transcript|EFX70357.1|protein_coding||c.*2917C>T|||||2846|,A|intergenic_re…
604	C376	Nickel-Copper	Hom-Het	105	302270	AA	AG	Exonic	113135	missense_variant													missense_variant|MODERATE|DAPPUDRAFT_113135|DAPPUDRAFT_113135|transcript|EFX69958.1|protein_coding|4/6|c.466A>G|p.Thr156Ala|466/978|466/978|156/325||,G|downstream_gene_variant|MODIFIER|DAPPUDRAFT_328597|DAPPUDRAFT_328597|transcript|EFX69957.1|protein_coding||c.*4106A>G|||||4106|
605	C376	Nickel-Copper	Hom-Het	130	254611	CC	TC	Intergenic	63009	upstream_gene_variant													upstream_gene_variant|MODIFIER|DAPPUDRAFT_63009|DAPPUDRAFT_63009|transcript|EFX68604.1|protein_coding||c.-758G>A|||||758|,T|downstream_gene_variant|MODIFIER|DAPPUDRAFT_62978|DAPPUDRAFT_62978|transcript|EFX68603.1|protein_coding||c.*3993G>A|||||3993|,T|intergenic_region|MODIFIER|DAPPUDRAFT_63009-DAPPUDRAFT_62978|DAPPUDRAFT_63009-DAPPUDRAFT_62978|intergenic_region|DAPPUDRAFT_63009-DAPPUDRAFT_62978|…
606	C376	Nickel-Copper	Hom-Het	141	115962	AA	AG	Intergenic	260665	upstream_gene_variant													upstream_gene_variant|MODIFIER|DAPPUDRAFT_260665|DAPPUDRAFT_260665|transcript|EFX68062.1|protein_coding||c.-3083T>C|||||3083|,G|intergenic_region|MODIFIER|DAPPUDRAFT_260665-DAPPUDRAFT_330463|DAPPUDRAFT_260665-DAPPUDRAFT_330463|intergenic_region|DAPPUDRAFT_260665-DAPPUDRAFT_330463|||n.115963A>G||||||
607	C378	Nickel-Copper	Hom-Het	11	1070790	CC	CT	Intergenic	238299	upstream_gene_variant													upstream_gene_variant|MODIFIER|DAPPUDRAFT_238299|DAPPUDRAFT_238299|transcript|EFX85069.1|protein_coding||c.-3824G>A|||||3824|,T|upstream_gene_variant|MODIFIER|DAPPUDRAFT_238301|DAPPUDRAFT_238301|transcript|EFX84863.1|protein_coding||c.-794C>T|||||794|,T|intergenic_region|MODIFIER|DAPPUDRAFT_238299-DAPPUDRAFT_238301|DAPPUDRAFT_238299-DAPPUDRAFT_238301|intergenic_region|DAPPUDRAFT_238299-DAPPUDRAFT…
608	C378	Nickel-Copper	Hom-Het	12	744682	CC	CT	Exonic	314695	synonymous_variant													synonymous_variant|LOW|DAPPUDRAFT_314695|DAPPUDRAFT_314695|transcript|EFX84704.1|protein_coding|10/15|c.1422G>A|p.Leu474Leu|1422/2407|1422/2244|474/747||,T|upstream_gene_variant|MODIFIER|DAPPUDRAFT_46936|DAPPUDRAFT_46936|transcript|EFX84705.1|protein_coding||c.-2728G>A|||||2728|
609	C378	Nickel-Copper	Hom-Het	12	1009330	CC	AC	Intergenic	238759	upstream_gene_variant													upstream_gene_variant|MODIFIER|DAPPUDRAFT_238759|DAPPUDRAFT_238759|transcript|EFX84678.1|protein_coding||c.-3803G>T|||||3803|,A|upstream_gene_variant|MODIFIER|DAPPUDRAFT_99571|DAPPUDRAFT_99571|transcript|EFX84677.1|protein_coding||c.-1759G>T|||||1759|WARNING_TRANSCRIPT_NO_START_CODON,A|upstream_gene_variant|MODIFIER|DAPPUDRAFT_46987|DAPPUDRAFT_46987|transcript|EFX84676.1|protein_coding||c.-1158G>…
610	C378	Nickel-Copper	Hom-Het	14	370817	CC	CG	Intronic	301617	5_prime_UTR_premature_start_codon_gain_variant													5_prime_UTR_premature_start_codon_gain_variant|LOW|DAPPUDRAFT_301617|DAPPUDRAFT_301617|transcript|EFX83585.1|protein_coding|1/3|c.-109C>G||||||,G|5_prime_UTR_variant|MODIFIER|DAPPUDRAFT_301617|DAPPUDRAFT_301617|transcript|EFX83585.1|protein_coding|1/3|c.-109C>G|||||109|,G|downstream_gene_variant|MODIFIER|DAPPUDRAFT_239556|DAPPUDRAFT_239556|transcript|EFX83859.1|protein_coding||c.*2579G>C|||||2579|
611	C378	Nickel-Copper	Hom-Het	14	598972	CC	CT	Intergenic	239618	upstream_gene_variant													upstream_gene_variant|MODIFIER|DAPPUDRAFT_239618|DAPPUDRAFT_239618|transcript|EFX83605.1|protein_coding||c.-23C>T|||||23|,T|upstream_gene_variant|MODIFIER|DAPPUDRAFT_100194|DAPPUDRAFT_100194|transcript|EFX83606.1|protein_coding||c.-783C>T|||||783|,T|upstream_gene_variant|MODIFIER|DAPPUDRAFT_315422|DAPPUDRAFT_315422|transcript|EFX83607.1|protein_coding||c.-1724C>T|||||1724|,T|downstream_gene_varia…
612	C378	Nickel-Copper	Hom-Het	19	791050	CC	CT	Intergenic	317090	downstream_gene_variant													downstream_gene_variant|MODIFIER|DAPPUDRAFT_317090|DAPPUDRAFT_317090|transcript|EFX81908.1|protein_coding||c.*819C>T|||||819|,T|intergenic_region|MODIFIER|DAPPUDRAFT_317090-DAPPUDRAFT_49450|DAPPUDRAFT_317090-DAPPUDRAFT_49450|intergenic_region|DAPPUDRAFT_317090-DAPPUDRAFT_49450|||n.791051C>T||||||
613	C378	Nickel-Copper	Hom-Het	22	991312	GG	GA	Intergenic	102719	downstream_gene_variant													downstream_gene_variant|MODIFIER|DAPPUDRAFT_102719|DAPPUDRAFT_102719|transcript|EFX81220.1|protein_coding||c.*2303C>T|||||2303|,A|intergenic_region|MODIFIER|DAPPUDRAFT_303608-DAPPUDRAFT_102719|DAPPUDRAFT_303608-DAPPUDRAFT_102719|intergenic_region|DAPPUDRAFT_303608-DAPPUDRAFT_102719|||n.991313G>A||||||
614	C378	Nickel-Copper	Hom-Het	52	549181	TT	TC	Intergenic	323212	upstream_gene_variant													upstream_gene_variant|MODIFIER|DAPPUDRAFT_323212|DAPPUDRAFT_323212|transcript|EFX75612.1|protein_coding||c.-458A>G|||||458|,C|upstream_gene_variant|MODIFIER|DAPPUDRAFT_107780|DAPPUDRAFT_107780|transcript|EFX75553.1|protein_coding||c.-252T>C|||||252|,C|upstream_gene_variant|MODIFIER|DAPPUDRAFT_250266|DAPPUDRAFT_250266|transcript|EFX75554.1|protein_coding||c.-4739T>C|||||4739|,C|intergenic_region|M…
615	C378	Nickel-Copper	Hom-Het	76	272046	GG	GA	Intergenic	326110	upstream_gene_variant													upstream_gene_variant|MODIFIER|DAPPUDRAFT_326110|DAPPUDRAFT_326110|transcript|EFX72556.1|protein_coding||c.-1061G>A|||||1061|,A|downstream_gene_variant|MODIFIER|DAPPUDRAFT_308209|DAPPUDRAFT_308209|transcript|EFX72554.1|protein_coding||c.*2743G>A|||||2387|,A|downstream_gene_variant|MODIFIER|DAPPUDRAFT_308179|DAPPUDRAFT_308179|transcript|EFX72555.1|protein_coding||c.*614G>A|||||570|,A|intergenic_re…
616	C378	Nickel-Copper	Hom-Het	81	427634	GG	GC	Exonic	308593	synonymous_variant													synonymous_variant|LOW|DAPPUDRAFT_308593|DAPPUDRAFT_308593|transcript|EFX72041.1|protein_coding|2/2|c.450G>C|p.Leu150Leu|549/827|450/630|150/209||,C|downstream_gene_variant|MODIFIER|DAPPUDRAFT_59461|DAPPUDRAFT_59461|transcript|EFX72054.1|protein_coding||c.*3989C>G|||||3989|WARNING_TRANSCRIPT_NO_START_CODON
617	C378	Nickel-Copper	Hom-Het	99	374815	AA	GA	Intronic	309468	3_prime_UTR_variant													3_prime_UTR_variant|MODIFIER|DAPPUDRAFT_309468|DAPPUDRAFT_309468|transcript|EFX70430.1|protein_coding|10/10|c.*427A>G|||||427|,G|upstream_gene_variant|MODIFIER|DAPPUDRAFT_228342|DAPPUDRAFT_228342|transcript|EFX70431.1|protein_coding||c.-2362A>G|||||2319|,G|downstream_gene_variant|MODIFIER|DAPPUDRAFT_231617|DAPPUDRAFT_231617|transcript|EFX70445.1|protein_coding||c.*646T>C|||||401|
618	C378	Nickel-Copper	Hom-Het	113	330998	GG	GA	Intergenic	62190 / 113602	intergenic_region													intergenic_region|MODIFIER|DAPPUDRAFT_62190-DAPPUDRAFT_113602|DAPPUDRAFT_62190-DAPPUDRAFT_113602|intergenic_region|DAPPUDRAFT_62190-DAPPUDRAFT_113602|||n.330999G>A||||||
619	C378	Nickel-Copper	Hom-Het	141	39515	CC	CT	Intergenic	218385	upstream_gene_variant													upstream_gene_variant|MODIFIER|DAPPUDRAFT_218385|DAPPUDRAFT_218385|transcript|EFX68039.1|protein_coding||c.-3923C>T|||||3794|,T|downstream_gene_variant|MODIFIER|DAPPUDRAFT_9137|DAPPUDRAFT_9137|transcript|EFX68038.1|protein_coding||c.*4848C>T|||||4848|WARNING_TRANSCRIPT_NO_START_CODON,T|downstream_gene_variant|MODIFIER|DAPPUDRAFT_63418|DAPPUDRAFT_63418|transcript|EFX68067.1|protein_coding||c.*4835…
620	C378	Nickel-Copper	Hom-Het	220	183705	GG	GA	Intergenic	333119 / 333121	intergenic_region													intergenic_region|MODIFIER|DAPPUDRAFT_333119-DAPPUDRAFT_333121|DAPPUDRAFT_333119-DAPPUDRAFT_333121|intergenic_region|DAPPUDRAFT_333119-DAPPUDRAFT_333121|||n.183706G>A||||||
621	C380	Nickel-Copper	Hom-Het	2	3094474	CC	TC	Intergenic	233375	upstream_gene_variant													upstream_gene_variant|MODIFIER|DAPPUDRAFT_233375|DAPPUDRAFT_233375|transcript|EFX89566.1|protein_coding||c.-3116G>A|||||3116|,T|downstream_gene_variant|MODIFIER|DAPPUDRAFT_233376|DAPPUDRAFT_233376|transcript|EFX89565.1|protein_coding||c.*274G>A|||||274|,T|intergenic_region|MODIFIER|DAPPUDRAFT_233375-DAPPUDRAFT_233376|DAPPUDRAFT_233375-DAPPUDRAFT_233376|intergenic_region|DAPPUDRAFT_233375-DAPPUDRA…
622	C380	Nickel-Copper	Hom-Het	3	786366	AA	GA	Intergenic	41046	upstream_gene_variant													upstream_gene_variant|MODIFIER|DAPPUDRAFT_41046|DAPPUDRAFT_41046|transcript|EFX89110.1|protein_coding||c.-1748T>C|||||1748|,G|upstream_gene_variant|MODIFIER|DAPPUDRAFT_233690|DAPPUDRAFT_233690|transcript|EFX89109.1|protein_coding||c.-221T>C|||||221|,G|upstream_gene_variant|MODIFIER|DAPPUDRAFT_304661|DAPPUDRAFT_304661|transcript|EFX88552.1|protein_coding||c.-871A>G|||||836|,G|intergenic_region|MOD…
623	C380	Nickel-Copper	Hom-Het	6	446416	CC	CG	Exonic	235609	missense_variant													missense_variant|MODERATE|DAPPUDRAFT_235609|DAPPUDRAFT_235609|transcript|EFX86875.1|protein_coding|1/1|c.1270C>G|p.Leu424Val|1270/5877|1270/5877|424/1958||,G|downstream_gene_variant|MODIFIER|DAPPUDRAFT_307050|DAPPUDRAFT_307050|transcript|EFX86873.1|protein_coding||c.*3871C>G|||||3800|,G|downstream_gene_variant|MODIFIER|DAPPUDRAFT_235608|DAPPUDRAFT_235608|transcript|EFX86874.1|protein_coding||c.*1…
624	C380	Nickel-Copper	Hom-Het	8	887417	CC	TC	Intergenic	308458	upstream_gene_variant													upstream_gene_variant|MODIFIER|DAPPUDRAFT_308458|DAPPUDRAFT_308458|transcript|EFX86141.1|protein_coding||c.-3213C>T|||||3213|,T|downstream_gene_variant|MODIFIER|DAPPUDRAFT_193158|DAPPUDRAFT_193158|transcript|EFX86139.1|protein_coding||c.*4169C>T|||||3769|,T|downstream_gene_variant|MODIFIER|DAPPUDRAFT_97958|DAPPUDRAFT_97958|transcript|EFX86140.1|protein_coding||c.*673C>T|||||673|WARNING_TRANSCRIPT…
625	C380	Nickel-Copper	Hom-Het	10	96181	GG	GA	Exonic	300337	missense_variant													missense_variant|MODERATE|DAPPUDRAFT_300337|DAPPUDRAFT_300337|transcript|EFX85169.1|protein_coding|7/9|c.1480G>A|p.Gly494Ser|1480/2004|1480/1920|494/639||,A|upstream_gene_variant|MODIFIER|DAPPUDRAFT_46236|DAPPUDRAFT_46236|transcript|EFX85170.1|protein_coding||c.-4574G>A|||||4574|,A|downstream_gene_variant|MODIFIER|DAPPUDRAFT_237569|DAPPUDRAFT_237569|transcript|EFX85673.1|protein_coding||c.*880C>T…
626	C380	Nickel-Copper	Hom-Het	12	1547797	CC	CT	Exonic	46794	synonymous_variant													synonymous_variant|LOW|DAPPUDRAFT_46794|DAPPUDRAFT_46794|transcript|EFX84496.1|protein_coding|1/2|c.138C>T|p.Ser46Ser|138/843|138/843|46/280||,T|upstream_gene_variant|MODIFIER|DAPPUDRAFT_194495|DAPPUDRAFT_194495|transcript|EFX84623.1|protein_coding||c.-1243G>A|||||1038|,T|upstream_gene_variant|MODIFIER|DAPPUDRAFT_238866|DAPPUDRAFT_238866|transcript|EFX84497.1|protein_coding||c.-4707C>T|||||4707|,…
627	C380	Nickel-Copper	Hom-Het	46	498633	TT	CT	Intergenic	55080	upstream_gene_variant													upstream_gene_variant|MODIFIER|DAPPUDRAFT_55080|DAPPUDRAFT_55080|transcript|EFX76437.1|protein_coding||c.-3892T>C|||||3892|,C|downstream_gene_variant|MODIFIER|DAPPUDRAFT_55188|DAPPUDRAFT_55188|transcript|EFX76436.1|protein_coding||c.*3694T>C|||||3694|,C|intergenic_region|MODIFIER|DAPPUDRAFT_55188-DAPPUDRAFT_55080|DAPPUDRAFT_55188-DAPPUDRAFT_55080|intergenic_region|DAPPUDRAFT_55188-DAPPUDRAFT_5508…
628	C380	Nickel-Copper	Hom-Het	76	570551	GG	AG	Intergenic	326142	upstream_gene_variant													upstream_gene_variant|MODIFIER|DAPPUDRAFT_326142|DAPPUDRAFT_326142|transcript|EFX72577.1|protein_coding||c.-241G>A|||||241|WARNING_TRANSCRIPT_NO_STOP_CODON,A|downstream_gene_variant|MODIFIER|DAPPUDRAFT_326141|DAPPUDRAFT_326141|transcript|EFX72576.1|protein_coding||c.*769G>A|||||492|,A|intergenic_region|MODIFIER|DAPPUDRAFT_326141-DAPPUDRAFT_326142|DAPPUDRAFT_326141-DAPPUDRAFT_326142|intergenic_reg…
629	C380	Nickel-Copper	Hom-Het	92	10763	CC	CT	Intergenic	U11	downstream_gene_variant													downstream_gene_variant|MODIFIER|U11|EMDPUG00000002529|transcript|EMDPUT00000002529.1|snRNA||n.*993C>T|||||993|,T|intergenic_region|MODIFIER|U11-DAPPUDRAFT_309229|EMDPUG00000002529-DAPPUDRAFT_309229|intergenic_region|EMDPUG00000002529-DAPPUDRAFT_309229|||n.10764C>T||||||
630	C380	Nickel-Copper	Hom-Het	133	199406	CC	TC	Intergenic	347288	upstream_gene_variant													upstream_gene_variant|MODIFIER|DAPPUDRAFT_347288|DAPPUDRAFT_347288|transcript|EFX68457.1|protein_coding||c.-734G>A|||||734|,T|downstream_gene_variant|MODIFIER|DAPPUDRAFT_218254|DAPPUDRAFT_218254|transcript|EFX68456.1|protein_coding||c.*1507G>A|||||889|,T|intergenic_region|MODIFIER|DAPPUDRAFT_347288-DAPPUDRAFT_218254|DAPPUDRAFT_347288-DAPPUDRAFT_218254|intergenic_region|DAPPUDRAFT_347288-DAPPUDRAF…
631	C380	Nickel-Copper	Hom-Het	142	238988	CC	TC	Intergenic	63437	upstream_gene_variant													upstream_gene_variant|MODIFIER|DAPPUDRAFT_63437|DAPPUDRAFT_63437|transcript|EFX68001.1|protein_coding||c.-2017C>T|||||2017|WARNING_TRANSCRIPT_NO_START_CODON,T|downstream_gene_variant|MODIFIER|DAPPUDRAFT_301724|DAPPUDRAFT_301724|transcript|EFX68000.1|protein_coding||c.*3229C>T|||||2965|,T|intergenic_region|MODIFIER|DAPPUDRAFT_301724-DAPPUDRAFT_63437|DAPPUDRAFT_301724-DAPPUDRAFT_63437|intergenic_re…
632	C380	Nickel-Copper	Hom-Het	155	245618	GG	GA	Exonic	63883	missense_variant													missense_variant|MODERATE|DAPPUDRAFT_63883|DAPPUDRAFT_63883|transcript|EFX67482.1|protein_coding|8/20|c.3238C>T|p.Pro1080Ser|3238/8277|3238/8277|1080/2758||
633	C380	Nickel-Copper	Hom-Het	221	74476	TT	TG	Intergenic	229629	downstream_gene_variant													downstream_gene_variant|MODIFIER|DAPPUDRAFT_229629|DAPPUDRAFT_229629|transcript|EFX65491.1|protein_coding||c.*1257T>G|||||1256|WARNING_TRANSCRIPT_NO_STOP_CODON,G|downstream_gene_variant|MODIFIER|DAPPUDRAFT_303621|DAPPUDRAFT_303621|transcript|EFX65503.1|protein_coding||c.*3285A>C|||||3013|,G|intron_variant|MODIFIER|DAPPUDRAFT_333124|DAPPUDRAFT_333124|transcript|EFX65492.1|protein_coding|1/4|c.901-…
634	C380	Nickel-Copper	Hom-Het	816	12727	TT	TC	Intergenic	229938	upstream_gene_variant													upstream_gene_variant|MODIFIER|DAPPUDRAFT_229938|DAPPUDRAFT_229938|transcript|EFX63056.1|protein_coding||c.-3384A>G|||||3384|,C|upstream_gene_variant|MODIFIER|DAPPUDRAFT_269150|DAPPUDRAFT_269150|transcript|EFX63055.1|protein_coding||c.-2861A>G|||||2861|,C|downstream_gene_variant|MODIFIER|DAPPUDRAFT_336001|DAPPUDRAFT_336001|transcript|EFX63053.1|protein_coding||c.*4461T>C|||||4461|,C|intron_varian…
635	C391	Nickel-Copper	Hom-Het	3	2679617	CC	TC	Exonic	95682	synonymous_variant													synonymous_variant|LOW|DAPPUDRAFT_95682|DAPPUDRAFT_95682|transcript|EFX88722.1|protein_coding|1/1|c.72C>T|p.Cys24Cys|72/432|72/432|24/143||,T|upstream_gene_variant|MODIFIER|DAPPUDRAFT_304755|DAPPUDRAFT_304755|transcript|EFX88723.1|protein_coding||c.-1097C>T|||||1097|,T|downstream_gene_variant|MODIFIER|DAPPUDRAFT_234052|DAPPUDRAFT_234052|transcript|EFX88721.1|protein_coding||c.*529C>T|||||529|
636	C391	Nickel-Copper	Hom-Het	13	639749	GG	GA	Exonic	194610	synonymous_variant													synonymous_variant|LOW|DAPPUDRAFT_194610|DAPPUDRAFT_194610|transcript|EFX84254.1|protein_coding|3/3|c.825C>T|p.Pro275Pro|931/1669|825/1449|275/482||,A|upstream_gene_variant|MODIFIER|DAPPUDRAFT_223072|DAPPUDRAFT_223072|transcript|EFX84256.1|protein_coding||c.-4311C>T|||||4257|,A|upstream_gene_variant|MODIFIER|DAPPUDRAFT_209708|DAPPUDRAFT_209708|transcript|EFX84255.1|protein_coding||c.-1694C>T|||||…
637	C391	Nickel-Copper	Hom-Het	15	1039963	TT	CT	Intergenic	100633	upstream_gene_variant													upstream_gene_variant|MODIFIER|DAPPUDRAFT_100633|DAPPUDRAFT_100633|transcript|EFX83465.1|protein_coding||c.-622A>G|||||622|,C|intergenic_region|MODIFIER|DAPPUDRAFT_100633-DAPPUDRAFT_315823|DAPPUDRAFT_100633-DAPPUDRAFT_315823|intergenic_region|DAPPUDRAFT_100633-DAPPUDRAFT_315823|||n.1039964T>C||||||
638	C391	Nickel-Copper	Hom-Het	26	931404	GG	GT	Intergenic	243976	upstream_gene_variant													upstream_gene_variant|MODIFIER|DAPPUDRAFT_243976|DAPPUDRAFT_243976|transcript|EFX80243.1|protein_coding||c.-855C>A|||||855|,T|intergenic_region|MODIFIER|DAPPUDRAFT_243976-DAPPUDRAFT_318890|DAPPUDRAFT_243976-DAPPUDRAFT_318890|intergenic_region|DAPPUDRAFT_243976-DAPPUDRAFT_318890|||n.931405G>T||||||
639	C391	Nickel-Copper	Hom-Het	29	1023744	CC	CT	Intergenic	244787	upstream_gene_variant													upstream_gene_variant|MODIFIER|DAPPUDRAFT_244787|DAPPUDRAFT_244787|transcript|EFX79625.1|protein_coding||c.-149G>A|||||149|,T|intergenic_region|MODIFIER|DAPPUDRAFT_244787-DAPPUDRAFT_304507|DAPPUDRAFT_244787-DAPPUDRAFT_304507|intergenic_region|DAPPUDRAFT_244787-DAPPUDRAFT_304507|||n.1023745C>T||||||
640	C391	Nickel-Copper	Hom-Het	43	501391	CC	CT	Intergenic	321838	upstream_gene_variant													upstream_gene_variant|MODIFIER|DAPPUDRAFT_321838|DAPPUDRAFT_321838|transcript|EFX76962.1|protein_coding||c.-294C>T|||||251|,T|upstream_gene_variant|MODIFIER|DAPPUDRAFT_321839|DAPPUDRAFT_321839|transcript|EFX76963.1|protein_coding||c.-1747C>T|||||1747|,T|downstream_gene_variant|MODIFIER|DAPPUDRAFT_306015|DAPPUDRAFT_306015|transcript|EFX76960.1|protein_coding||c.*3741C>T|||||3130|,T|downstream_gene…
641	C391	Nickel-Copper	Hom-Het	48	644106	TT	TA	Intergenic	107274	upstream_gene_variant													upstream_gene_variant|MODIFIER|DAPPUDRAFT_107274|DAPPUDRAFT_107274|transcript|EFX76168.1|protein_coding||c.-4872A>T|||||4872|,A|intron_variant|MODIFIER|DAPPUDRAFT_322645|DAPPUDRAFT_322645|transcript|EFX76121.1|protein_coding|2/4|c.462+3433T>A||||||
642	C391	Nickel-Copper	Hom-Het	62	282719	GG	TG	Intergenic	57300	upstream_gene_variant													upstream_gene_variant|MODIFIER|DAPPUDRAFT_57300|DAPPUDRAFT_57300|transcript|EFX74316.1|protein_coding||c.-4092C>A|||||4092|,T|upstream_gene_variant|MODIFIER|mir-279|EMDPUG00000004604|transcript|EMDPUT00000004604.1|miRNA||n.-967G>T|||||967|,T|downstream_gene_variant|MODIFIER|DAPPUDRAFT_57329|DAPPUDRAFT_57329|transcript|EFX74223.1|protein_coding||c.*1621G>T|||||1621|,T|downstream_gene_variant|MODIF…
643	C391	Nickel-Copper	Hom-Het	128	95165	GG	GT	Intergenic	259744	upstream_gene_variant													upstream_gene_variant|MODIFIER|DAPPUDRAFT_259744|DAPPUDRAFT_259744|transcript|EFX68684.1|protein_coding||c.-3059G>T|||||3059|,T|downstream_gene_variant|MODIFIER|DAPPUDRAFT_259742|DAPPUDRAFT_259742|transcript|EFX68683.1|protein_coding||c.*1413G>T|||||1413|,T|intergenic_region|MODIFIER|DAPPUDRAFT_259742-DAPPUDRAFT_259744|DAPPUDRAFT_259742-DAPPUDRAFT_259744|intergenic_region|DAPPUDRAFT_259742-DAPPUD…
644	C391	Nickel-Copper	Hom-Het	206	34160	GG	GA	Intergenic	332753	downstream_gene_variant													downstream_gene_variant|MODIFIER|DAPPUDRAFT_332753|DAPPUDRAFT_332753|transcript|EFX65847.1|protein_coding||c.*3555G>A|||||3555|,A|downstream_gene_variant|MODIFIER|DAPPUDRAFT_264105|DAPPUDRAFT_264105|transcript|EFX65868.1|protein_coding||c.*1844C>T|||||1844|,A|downstream_gene_variant|MODIFIER|DAPPUDRAFT_264106|DAPPUDRAFT_264106|transcript|EFX65867.1|protein_coding||c.*2386C>T|||||2386|,A|intergeni…

## Sheet: Table S6
Table S6. Details of the 16 small INDELs detected. Type indicates if the affected site was homozygous (Hom) or heterozygous (Het) before and after the INDEL. Genome region, gene (DAPPUDRAFT_### in reference genome, or closest gene if mutation occurred in an intergenic region) and effects were determined using snpEFF v4.30. Cingolani P et al. (2012) A program for annotating and predicting the effe…
#	Line	Treatment	Type	In/Del	Length	Scaffold	Start position	Ancestral state	Mutant state	Genome region	Gene	Effect
1	C002	Metal-free control	Hom-Het	Insertion	2	12	891479	T;T	T;TTC	Exonic	314726	frameshift_variant
2	C017	Metal-free control	Hom-Het	Deletion	4	12	1246419	TTGGA;TTGGA	TTGGA;T	Exonic	99613	frameshift_variant
3	C021	Metal-free control	Hom-Het	Deletion	1	14	1376349	TC;TC	TC;T	Intergenic	239817	downstream_gene_variant
4	C036	Metal-free control	Hom-Het	Deletion	1	182	129116	TC;TC	T;TC	Intergenic	302681	downstream_gene_variant
5	C037	Metal-free control	Hom-Het	Deletion	1	5	76129	AC;AC	AC;A	Exonic	311851	frameshift_variant
6	C039	Metal-free control	Hom-Het	Deletion	7	26	864716	ATAGGTAT;ATAGGTAT	ATAGGTAT;A	Intergenic	6952	upstream_gene_variant
7	C049	Metal-free control	Hom-Het	Deletion	1	8	1323798	GC;GC	GC;G	Intergenic	313227	upstream_gene_variant
8	C178	Nickel	Hom-Het	Deletion	2	39	604658	GAT;GAT	G;GAT	Intergenic	53920	upstream_gene_variant
9	C280	Copper	Hom-Het	Deletion	1	34	588315	TC;TC	TC;T	Intergenic	26684	upstream_gene_variant
10	C280	Copper	Hom-Het	Deletion	5	44	715970	AGGTGC;AGGTGC	AGGTG;CA	Intergenic	322035	upstream_gene_variant
11	C299	Copper	Hom-Het	Deletion	2	17	715929	CGT;CGT	CGT;C	Intergenic	48935	downstream_gene_variant
12	C300	Copper	Hom-Het	Deletion	3	61	512525	CATT;CATT	CATT;C	Exonic	199988	conservative_inframe_deletion
13	C355	Nickel-Copper	Hom-Het	Deletion	4	69	373054	TGTTG;TGTTG	TGTTG;T	Exonic	325323	frameshift_variant
14	C374	Nickel-Copper	Hom-Het	Deletion	1	215	129511	AT;AT	A;AT	Intergenic	264406	upstream_gene_variant
15	C376	Nickel-Copper	Hom-Het	Deletion	1	121	222705	AG;AG	AG;A	Intronic	30835	intron_variant
16	C391	Nickel-Copper	Hom-Het	Deletion	1	78	278765	GA;GA	G;GA	Intergenic	254539	downstream_gene_variant

## Sheet: Table S7
Table S7. Details of the 67 LOH events detected. Ratio is the average coverage across the LOH event in the affected line divided by that averaged across that region for all lines, corrected for the difference in genome-wide coverage for that line compared to genome-wide coverage averaged across all lines. For events covering multiple scaffolds, we do not report start site since the relative orien…
							Event size (bp)
#	Line	Treatment	Type	Ratio	Scaffold(s)	Start Site	Minimum	Mid Point	Maximum	Chromosome
1	C001	Metal-free control	Hemizygous Deletion	0.54	20	1063860	1259	1264	1262	5,8
2	C002	Metal-free control	Conversion	0.96	257	49200	338	424	381	?
3	C002	Metal-free control	Hemizygous Deletion	0.56	173	171200	1528	1646	1587	10
4	C008	Metal-free control	Hemizygous Deletion	0.7	48	122634	3884	4113	3999	7
5	C014	Metal-free control	Conversion	0.86	142	133692	213	292	253	12
6	C017	Metal-free control	Hemizygous Deletion	0.65	38	557455	5472	5593	5533	5
7	C020	Metal-free control	Hemizygous Deletion	0.52	12	1029277	731	939	835	5
8	C020	Metal-free control	Hemizygous Deletion	0.61	5	1108084	3785	4330	4058	12
9	C023	Metal-free control	Conversion	0.81	247	103109	203	382	293	8
10	C023	Metal-free control	Conversion	1.22	1	3177281	210	311	261	2
11	C023	Metal-free control	Conversion	0.79	58	468285	1979	2065	2022	2,12
12	C023	Metal-free control	Conversion	0.9	81, 85, 111, 116, 166, 177, 193, 260, 280, 283, 327, 350, 406, 684	-	1718070	-	-	11
13	C023	Metal-free control	Hemizygous Deletion	0.38	146	125071	385	553	469	12
14	C027	Metal-free control	Hemizygous Deletion	0.73	97	235150	2911	3066	2989	3
15	C038	Metal-free control	Conversion	1.03	21	854247	213	229	221	3
16	C038	Metal-free control	Hemizygous Deletion	0.54	104	238632	632	1219	926	9
17	C038	Metal-free control	Hemizygous Deletion	0.48	88	143544	998	1026	1012	10
18	C040	Metal-free control	Conversion	0.91	38	462399	281	296	289	5
19	C040	Metal-free control	Conversion	0.8	152	74058	423	2379	1401	12
20	C040	Metal-free control	Conversion	1.02	102	234956	225173	225236	225205	10
21	C040	Metal-free control	Conversion	0.98	10, 24, 67, 75, 81, 85, 111, 116, 141, 166, 177, 193, 242, 260, 280, 283, 315, 327, 350, 406, 444, 684, 743, 1008, 1108, 1579, 4243, 4248, 4333, 5176, 6589, 6837, 7138	-	7349102	-	-	11
22	C040	Metal-free control	Hemizygous Deletion	0.54	1684	5031	274	1182	728	?
23	C040	Metal-free control	Hemizygous Deletion	0.65	9254	828	374	1302	838	?
24	C040	Metal-free control	Hemizygous Deletion	0.52	146	125071	385	409	397	12
25	C049	Metal-free control	Conversion	1.15	29	1166464	581	630	606	10
26	C049	Metal-free control	Conversion	0.92	3	2850295	16465	16577	16521	1
27	C155	Nickel	Conversion	0.81	4	2624325	302	410	356	7
28	C171	Nickel	Hemizygous Deletion	0.57	21	621523	1893	2000	1947	3
29	C178	Nickel	Conversion	0.81	2	2588824	42974	43058	43016	?
30	C182	Nickel	Conversion	0.88	5	1754998	232	329	281	12
31	C182	Nickel	Hemizygous Deletion	0.53	12	1523743	679	800	740	5
32	C187	Nickel	Conversion	0.91	174	110209	243	398	321	3
33	C187	Nickel	Hemizygous Deletion	0.57	20	215657	370013	370087	370050	?
34	C251	Copper	Conversion	0.92	31	947080	206	315	261	4
35	C251	Copper	Hemizygous Deletion	0.54	134	191222	580	2678	1629	2
36	C254	Copper	Hemizygous Deletion	0.49	10	1506658	21621	21698	21660	11
37	C280	Copper	Conversion	0.81	1512	1693	226	250	238	?
38	C280	Copper	Conversion	0.82	34	1056663	369	379	374	8
39	C280	Copper	Hemizygous Deletion	0.6	295	6699	250	323	287	?
40	C280	Copper	Hemizygous Deletion	0.73	34	1083408	9812	9830	9821	8
41	C280	Copper	Hemizygous Deletion	0.7	18	1027332	402753	402796	402775	7
42	C281	Copper	Conversion	1.01	182	149431	263	418	341	10
43	C299	Copper	Conversion	0.77	59	196265	249	368	309	12
44	C291	Copper	Hemizygous Deletion	0.41	68	623759	375	433	404	7
45	C291	Copper	Hemizygous Deletion	0.57	127	147001	637	668	653	?
46	C291	Copper	Hemizygous Deletion	0.44	128	320570	739	879	809	3
47	C291	Copper	Hemizygous Deletion	0.56	1867	806	4081	4236	4159	?
48	C291	Copper	Hemizygous Deletion	0.54	82	493292	53884	54077	53981	7
49	C291	Copper	Hemizygous Deletion	0.59	48, 133	-	717371	-	-	7
50	C300	Copper	Hemizygous Deletion	0.49	20	1039216	5930	6073	6002	5,8
51	C352	Nickel-Copper	Conversion	0.87	10	1362695	6693	6724	6709	11
52	C352	Nickel-Copper	Hemizygous Deletion	0.58	23, 80, 123	-	1044420	-	-	6
53	C355	Nickel-Copper	Conversion	0.9	794	6574	945	1102	1024	?
54	C364	Nickel-Copper	Conversion	0.83	8	1665461	234	349	292	4
55	C372	Nickel-Copper	Hemizygous Deletion	0.64	6	278403	795	844	820	10
56	C374	Nickel-Copper	Hemizygous Deletion	0.56	9	326523	1072	1142	1107	9
57	C374	Nickel-Copper	Hemizygous Deletion	0.6	10	1739255	12903	13078	12991	11
58	C374	Nickel-Copper	Hemizygous Deletion	0.56	10	1388059	10564	10703	10634	11
59	C376	Nickel-Copper	Conversion	1.39	35	218445	208	1094	651	10
60	C376	Nickel-Copper	Conversion	1.28	247	103109	252	427	340	8
61	C376	Nickel-Copper	Conversion	0.94	315	18381	48291	48442	48367	?
62	C376	Nickel-Copper	Conversion	0.92	58	281087	698	867	783	10
63	C376	Nickel-Copper	Conversion	0.97	102	238228	221901	221973	221937	10
64	C376	Nickel-Copper	Conversion	1	10, 24, 67, 75, 81, 85, 111, 116, 114, 166, 177, 193, 242, 260, 280, 283, 315, 327, 350, 406, 444, 684, 743, 1008, 1108, 1579, 4243, 4248, 4333, 5176, 6589, 6837, 7138	-	7336814	-	-	11
65	C376	Nickel-Copper	Hemizygous Deletion	0.65	1392	184	428	466	447	?
66	C376	Nickel-Copper	Hemizygous Deletion	0.57	135	83715	834	1220	1027	2
67	C391	Nickel-Copper	Hemizygous Deletion	0.55	17	1387063	8951	9441	9196	10
